# Supplementary material
Source: Research Square preprint supplement (doi:10.21203/rs.3.rs-9139538/v1)
Supplement: Supplementary file 1 [file 97dcbcd1287818ced9ee8a00.pdf]

## 1. In-depth interview guide for midwifery educators

### Evaluation of an innovative programme to drive down maternal mortality and neonatal mortality in Nigeria

#### Preamble

We are carrying out research on midwifery education and training in 20 midwifery institutions to evaluate the impact of maternal and newborn health interventions aimed at reducing preventable maternal deaths in Nigeria. You have been invited to take part in the study because you are a midwifery educator at **XX** training institution. By sharing your views, we will gain a better understanding of midwifery education and training within the local context and plan better for future training. All the answers you give will be confidential. The questions will take about 1 hour. Your participation in the study is voluntary. If I ask any question you don't want to answer, please let me know and I will go on to the next question or you can stop the interview at any time. The discussion will be audio recorded to help with writing out the notes.

Do you have any questions? **YES/ NO**            May I begin the interview now? **YES/ NO**

#### SECTION 1: DEMOGRAPHIC INFORMATION

| Demographic information                                                      | Response |
|------------------------------------------------------------------------------|----------|
| Date of interview                                                            |          |
| Name of interviewer                                                          |          |
| Participant ID                                                               |          |
| State                                                                        |          |
| Midwifery institution                                                        |          |
| Age                                                                          |          |
| Gender                                                                       |          |
| Educational level                                                            |          |
| How many years have you worked as an educator at this midwifery institution? |          |

#### SECTION 2: SIMULATION

- What are the current practices of teaching and learning at your institution? **Probe: Answer based on your current curriculum, council requirements, time spent in classroom, skills lab, clinical placement**

- What are the strengths and gaps that you see in the current teaching and learning practice?
- To have an enabling environment for implementing simulation-based programs, what are the needs that you see from an institutional level and as a faculty?

### **SECTION 3: DIGITAL SKILLS FOR FACULTY**

**Tell me what you think about the use of digital technology use in the midwifery curriculum**

**Probes:**

- How comfortable are you with using digital tools like emails, online learning platforms, or video calls for teaching and learning?
- How prepared do you feel as an academic/teacher to use pre-created resources?
- How about your students? Do you think they will be receptive to try new things?
- How can digital learning tools make learning more fun and interactive?
- What digital skills do you think are important for learning and which ones do you already have?
- How would you like to learn about creating new resources yourself?
- Are there any specific skills you think are relevant to digital learning and do you have any?

### **SECTION 4: IMPLEMENTING DIGITAL LEARNING IN THE CURRICULUM**

**How can faculty be better supported using digital teaching resources?**

**Probes**

- Could online, mobile-based, or self-paced learning modules help bridge the gap in digital training?
- Should it be short workshops, ongoing mentorship, or hands-on practice? What do you think works best?

**Have you seen or used digital learning resources that worked well in your context?**

### **SECTION 5: POTENTIAL CHALLENGES AND SOLUTIONS**

**What potential challenges should we be considering?**

**Probes**

- Limited computers, unstable internet, and power shortages are common challenges—what do you think are some practical ways to work around these issues?
- How can we protect student and faculty information when using online learning platforms?

**How can digital learning be adapted to be useful for educators and students in rural settings?**

**Probe:** Would offline tools, or SMS-based learning work? What alternatives do you think are realistic?

## SECTION 6: MONITORING EFFECTIVENESS

### How will we know digital learning is effective in schools?

#### Probes:

- How can we tell if digital learning is working well for faculty?
- What are the best ways to check if students are actually learning and applying digital skills?
- How can we use student feedback and real-life experiences to improve assessments?

### 2. In-depth interview guide for preceptors

#### Evaluation of an innovative programme to drive down maternal mortality and neonatal mortality in Nigeria

##### Preamble

We are carrying out research on midwifery education and training in 20 midwifery institutions to evaluate the impact of maternal and newborn health interventions aimed at reducing preventable maternal deaths in Nigeria. You have been invited to take part in the study because you are a preceptor in ..... training institution. By sharing your views, we will gain a better understanding of midwifery education and training within the local context and plan better for future training. All the answers you give will be confidential. The questions will take about 40 minutes. Your participation in the study is voluntary. If I ask any question you don't want to answer, please let me know and I will go on to the next question or you can stop the interview at any time. The discussion will be audio recorded to help with writing out the notes.

Do you have any questions? **YES/ NO**

May I begin the interview now? **YES/ NO**

|   | Demographic information | Response |
|---|-------------------------|----------|
| 1 | Date of interview       |          |
| 2 | State                   |          |
| 3 | Midwifery institution   |          |
| 4 | Name of health facility |          |
| 6 | Name of interviewer     |          |
| 7 | Age                     |          |
| 8 | Gender                  |          |
| 9 | Educational level       |          |

|    |                                                                              |  |
|----|------------------------------------------------------------------------------|--|
| 10 | How many years have you worked as a preceptor at this midwifery institution? |  |
| 11 | How many hours a week/month do you provide clinical learning for students?   |  |
| 12 | How many students do you support during clinical learning at the hospital?   |  |

### **Experiences supporting midwifery education**

1. Briefly describe your role in supporting students during clinical learning in the hospital.
2. What part of your role as a preceptor do you find enjoyable or rewarding?
3. What part of your role as a preceptor do you find challenging?
4. How can preceptors be supported to provide clinical learning for midwifery students during placement?

### **Digital learning/technology**

5. What are your views regarding the use of digital technology in midwifery education? Probe: online learning platforms e.g. Moodle, videos, podcasts, google/online resources
6. What type of digital technology have you used if any to update your knowledge/skills in midwifery? probe: hinderances to using digital technology
7. Can you share any previous experience you have had using digital/online learning platform? (Probe: what device used, platform, internet materials accessed, student reaction)
8. In what ways can the use of digital technology be used to improve student knowledge and skills for midwifery students?
9. What are the major challenges to using digital technology in midwifery education?
10. Is there anything else you would like to say about preceptorship that we have not covered?

### 3. Focus group discussion guide for students

#### Evaluation of an innovative programme to drive down maternal mortality and neonatal mortality in Nigeria

##### Preamble

We are carrying out research on midwifery education and training in 20 midwifery institutions to evaluate the impact of maternal and newborn health interventions aimed at reducing preventable maternal deaths in Nigeria. You have been invited to take part in the study because you are a final year midwifery student **XX** training institution. By sharing your views, we will gain a better understanding of midwifery education and training within the local context and plan better for future training. All the answers you give will be confidential. The questions will take about one hour. Your participation in the study is voluntary. If I ask any question you don't want to answer, please let me know and I will go on to the next question or you can stop the interview at any time. The discussion will be audio recorded to help with writing out the notes.

Do you have any questions? **YES/ NO**

May I begin the interview now? **YES/ NO**

|   | Demographic information                                        | Response |
|---|----------------------------------------------------------------|----------|
| 1 | Date of interview                                              |          |
| 2 | Name of interviewer                                            |          |
| 3 | State                                                          |          |
| 4 | Midwifery institution                                          |          |
| 5 | Age                                                            |          |
| 6 | Gender                                                         |          |
| 7 | Type of digital device owned (smart phone, laptop, tablet etc) |          |

##### Questions

11. What are your thoughts on the use of digital technology as part of the midwifery curriculum/in your educational journey to becoming a midwife?

##### Probe:

- [Online learning platforms/virtual classrooms](#): group activities, lecture notes and reading materials uploaded on a learning platform e.g. Moodle, WCEA etc

- [Online educational resources](#): videos, animations, links for further reading included in class notes
- [Mobile learning and online tools](#) e.g. google drive and Dropbox (enable students and teachers to work on a project)

12. What type of digital technology have you used for educational purposes during the midwifery course, If any?
13. What type of digital technology/online resources did you find most relevant in understanding midwifery modules? Probe: videos, internet materials etc.
14. What are the major challenges to using digital technology in your learning?
15. What improvements would you like to see in integrating digital technology into your midwifery program? Probe: [support sessions on how to use learning platforms](#), [how to find resources](#), [how to participate in an online group activity](#), [access to internet/device](#)

Is there anything else you would like to say about the use of digital technology for midwifery training?
