# Supplementary material
Source: Research Square preprint supplement (doi:10.21203/rs.3.rs-9139538/v1)
Supplement: Supplementary file 2 [file edf0b036cc3d6398a34ad1c1.pdf]

# Data Dictionary Codebook

2025-01-17 2:47pm

| #                                                                                                                  | Variable / Field Name                                        | Field Label<br><i>Field Note</i>                                                                                                                                                                                                                                                                                                                                                                                                                                                                                                                                                                                                                                      | Field Attributes (Field Type, Validation, Choices, Calculations, etc.)                                                                                                                                                                                                                                                                                                                                                                                                                                                 |   |                                                |   |                                                     |   |             |   |              |   |              |   |            |   |               |   |             |   |               |    |            |    |               |
|--------------------------------------------------------------------------------------------------------------------|--------------------------------------------------------------|-----------------------------------------------------------------------------------------------------------------------------------------------------------------------------------------------------------------------------------------------------------------------------------------------------------------------------------------------------------------------------------------------------------------------------------------------------------------------------------------------------------------------------------------------------------------------------------------------------------------------------------------------------------------------|------------------------------------------------------------------------------------------------------------------------------------------------------------------------------------------------------------------------------------------------------------------------------------------------------------------------------------------------------------------------------------------------------------------------------------------------------------------------------------------------------------------------|---|------------------------------------------------|---|-----------------------------------------------------|---|-------------|---|--------------|---|--------------|---|------------|---|---------------|---|-------------|---|---------------|----|------------|----|---------------|
| Instrument: <b>Students Maternal Shock Scenario</b> (students_maternal_shock_scenario) [collapsed]                 |                                                              |                                                                                                                                                                                                                                                                                                                                                                                                                                                                                                                                                                                                                                                                       |                                                                                                                                                                                                                                                                                                                                                                                                                                                                                                                        |   |                                                |   |                                                     |   |             |   |              |   |              |   |            |   |               |   |             |   |               |    |            |    |               |
| Instrument: <b>BMGF Nigeria Maternal Mortality Baseline</b> (bmgf_nigeria_maternal_mortality_baseline) [collapsed] |                                                              |                                                                                                                                                                                                                                                                                                                                                                                                                                                                                                                                                                                                                                                                       |                                                                                                                                                                                                                                                                                                                                                                                                                                                                                                                        |   |                                                |   |                                                     |   |             |   |              |   |              |   |            |   |               |   |             |   |               |    |            |    |               |
| Instrument: <b>Data demo</b> (data_demo) [collapsed]                                                               |                                                              |                                                                                                                                                                                                                                                                                                                                                                                                                                                                                                                                                                                                                                                                       |                                                                                                                                                                                                                                                                                                                                                                                                                                                                                                                        |   |                                                |   |                                                     |   |             |   |              |   |              |   |            |   |               |   |             |   |               |    |            |    |               |
| Instrument: <b>Institutional assessment tool_V1</b> (institutional_assessment_tool_v1) [collapsed]                 |                                                              |                                                                                                                                                                                                                                                                                                                                                                                                                                                                                                                                                                                                                                                                       |                                                                                                                                                                                                                                                                                                                                                                                                                                                                                                                        |   |                                                |   |                                                     |   |             |   |              |   |              |   |            |   |               |   |             |   |               |    |            |    |               |
| Instrument: <b>Teaching Observation Form_V1</b> (teaching_observation_form_v1) [collapsed]                         |                                                              |                                                                                                                                                                                                                                                                                                                                                                                                                                                                                                                                                                                                                                                                       |                                                                                                                                                                                                                                                                                                                                                                                                                                                                                                                        |   |                                                |   |                                                     |   |             |   |              |   |              |   |            |   |               |   |             |   |               |    |            |    |               |
| Instrument: <b>Staff retention initial online survey</b> (staff_retention_initial_online_survey) [collapsed]       |                                                              |                                                                                                                                                                                                                                                                                                                                                                                                                                                                                                                                                                                                                                                                       |                                                                                                                                                                                                                                                                                                                                                                                                                                                                                                                        |   |                                                |   |                                                     |   |             |   |              |   |              |   |            |   |               |   |             |   |               |    |            |    |               |
| Instrument: <b>NMCN checklist tool_2025</b> (nmcn_checklist_tool_2025) [collapsed]                                 |                                                              |                                                                                                                                                                                                                                                                                                                                                                                                                                                                                                                                                                                                                                                                       |                                                                                                                                                                                                                                                                                                                                                                                                                                                                                                                        |   |                                                |   |                                                     |   |             |   |              |   |              |   |            |   |               |   |             |   |               |    |            |    |               |
| Instrument: <b>OSCE Basic Life Support Of The Newborn V1</b> (osce_basic_life_support_of_the_newborn_v1)           |                                                              |                                                                                                                                                                                                                                                                                                                                                                                                                                                                                                                                                                                                                                                                       |                                                                                                                                                                                                                                                                                                                                                                                                                                                                                                                        |   |                                                |   |                                                     |   |             |   |              |   |              |   |            |   |               |   |             |   |               |    |            |    |               |
| 951                                                                                                                | [ c_aa01 ]                                                   | Section Header: <i>Skill 1: Basic Life Support of the Newborn - (5 minutes per participant)</i> Equipment: <i>Needed: Neonatal mannequin; neonatal bag and mask; baby hat, towels x3; stethoscope.</i> Scenario: <i>A 37-week baby was born through vaginal delivery to a 22-year-old primigravida with severe pre-eclampsia after induction of labour. After delivery the baby did not cry immediately after birth and appeared blue and floppy. You are the midwife attending to the delivery</i> Questions (Please do not prompt) <i>Please give whole marks if participants mention all the answers. No decimal places e.g. 1.5 etc.)</i><br><br>1. Name of state | dropdown, Required<br><table border="1"> <tr><td>1</td><td>Akwa Ibom (AKW)</td></tr> <tr><td>2</td><td>Bauchi (BAU)</td></tr> <tr><td>3</td><td>Borno (BOR)</td></tr> <tr><td>4</td><td>Ebonyi (EBO)</td></tr> <tr><td>5</td><td>Kaduna (KAD)</td></tr> <tr><td>6</td><td>Kano (KAU)</td></tr> <tr><td>7</td><td>Katsina (KAT)</td></tr> <tr><td>8</td><td>Niger (NIG)</td></tr> <tr><td>9</td><td>Plateau (PLT)</td></tr> <tr><td>10</td><td>Yobe (YOB)</td></tr> <tr><td>11</td><td>Zamfara (ZAM)</td></tr> </table> | 1 | Akwa Ibom (AKW)                                | 2 | Bauchi (BAU)                                        | 3 | Borno (BOR) | 4 | Ebonyi (EBO) | 5 | Kaduna (KAD) | 6 | Kano (KAU) | 7 | Katsina (KAT) | 8 | Niger (NIG) | 9 | Plateau (PLT) | 10 | Yobe (YOB) | 11 | Zamfara (ZAM) |
| 1                                                                                                                  | Akwa Ibom (AKW)                                              |                                                                                                                                                                                                                                                                                                                                                                                                                                                                                                                                                                                                                                                                       |                                                                                                                                                                                                                                                                                                                                                                                                                                                                                                                        |   |                                                |   |                                                     |   |             |   |              |   |              |   |            |   |               |   |             |   |               |    |            |    |               |
| 2                                                                                                                  | Bauchi (BAU)                                                 |                                                                                                                                                                                                                                                                                                                                                                                                                                                                                                                                                                                                                                                                       |                                                                                                                                                                                                                                                                                                                                                                                                                                                                                                                        |   |                                                |   |                                                     |   |             |   |              |   |              |   |            |   |               |   |             |   |               |    |            |    |               |
| 3                                                                                                                  | Borno (BOR)                                                  |                                                                                                                                                                                                                                                                                                                                                                                                                                                                                                                                                                                                                                                                       |                                                                                                                                                                                                                                                                                                                                                                                                                                                                                                                        |   |                                                |   |                                                     |   |             |   |              |   |              |   |            |   |               |   |             |   |               |    |            |    |               |
| 4                                                                                                                  | Ebonyi (EBO)                                                 |                                                                                                                                                                                                                                                                                                                                                                                                                                                                                                                                                                                                                                                                       |                                                                                                                                                                                                                                                                                                                                                                                                                                                                                                                        |   |                                                |   |                                                     |   |             |   |              |   |              |   |            |   |               |   |             |   |               |    |            |    |               |
| 5                                                                                                                  | Kaduna (KAD)                                                 |                                                                                                                                                                                                                                                                                                                                                                                                                                                                                                                                                                                                                                                                       |                                                                                                                                                                                                                                                                                                                                                                                                                                                                                                                        |   |                                                |   |                                                     |   |             |   |              |   |              |   |            |   |               |   |             |   |               |    |            |    |               |
| 6                                                                                                                  | Kano (KAU)                                                   |                                                                                                                                                                                                                                                                                                                                                                                                                                                                                                                                                                                                                                                                       |                                                                                                                                                                                                                                                                                                                                                                                                                                                                                                                        |   |                                                |   |                                                     |   |             |   |              |   |              |   |            |   |               |   |             |   |               |    |            |    |               |
| 7                                                                                                                  | Katsina (KAT)                                                |                                                                                                                                                                                                                                                                                                                                                                                                                                                                                                                                                                                                                                                                       |                                                                                                                                                                                                                                                                                                                                                                                                                                                                                                                        |   |                                                |   |                                                     |   |             |   |              |   |              |   |            |   |               |   |             |   |               |    |            |    |               |
| 8                                                                                                                  | Niger (NIG)                                                  |                                                                                                                                                                                                                                                                                                                                                                                                                                                                                                                                                                                                                                                                       |                                                                                                                                                                                                                                                                                                                                                                                                                                                                                                                        |   |                                                |   |                                                     |   |             |   |              |   |              |   |            |   |               |   |             |   |               |    |            |    |               |
| 9                                                                                                                  | Plateau (PLT)                                                |                                                                                                                                                                                                                                                                                                                                                                                                                                                                                                                                                                                                                                                                       |                                                                                                                                                                                                                                                                                                                                                                                                                                                                                                                        |   |                                                |   |                                                     |   |             |   |              |   |              |   |            |   |               |   |             |   |               |    |            |    |               |
| 10                                                                                                                 | Yobe (YOB)                                                   |                                                                                                                                                                                                                                                                                                                                                                                                                                                                                                                                                                                                                                                                       |                                                                                                                                                                                                                                                                                                                                                                                                                                                                                                                        |   |                                                |   |                                                     |   |             |   |              |   |              |   |            |   |               |   |             |   |               |    |            |    |               |
| 11                                                                                                                 | Zamfara (ZAM)                                                |                                                                                                                                                                                                                                                                                                                                                                                                                                                                                                                                                                                                                                                                       |                                                                                                                                                                                                                                                                                                                                                                                                                                                                                                                        |   |                                                |   |                                                     |   |             |   |              |   |              |   |            |   |               |   |             |   |               |    |            |    |               |
| 952                                                                                                                | [ c_aa01a ]<br><br>Show the field ONLY if:<br>[c_aa01] = '1' | 1a. Akwa Ibom state facilities                                                                                                                                                                                                                                                                                                                                                                                                                                                                                                                                                                                                                                        | dropdown, Required<br><table border="1"> <tr><td>1</td><td>(1) College of Nursing Sciences, Anua Uyo</td></tr> </table>                                                                                                                                                                                                                                                                                                                                                                                                | 1 | (1) College of Nursing Sciences, Anua Uyo      |   |                                                     |   |             |   |              |   |              |   |            |   |               |   |             |   |               |    |            |    |               |
| 1                                                                                                                  | (1) College of Nursing Sciences, Anua Uyo                    |                                                                                                                                                                                                                                                                                                                                                                                                                                                                                                                                                                                                                                                                       |                                                                                                                                                                                                                                                                                                                                                                                                                                                                                                                        |   |                                                |   |                                                     |   |             |   |              |   |              |   |            |   |               |   |             |   |               |    |            |    |               |
| 953                                                                                                                | [ c_aa01b ]<br><br>Show the field ONLY if:<br>[c_aa01] = '2' | 1b. Bauchi state facilities                                                                                                                                                                                                                                                                                                                                                                                                                                                                                                                                                                                                                                           | dropdown, Required<br><table border="1"> <tr><td>1</td><td>(1) ATBUTH College of Nursing Sciences, Bauchi</td></tr> <tr><td>2</td><td>(2) Adamu College of Nursing Sciences, Azare Bauchi</td></tr> </table>                                                                                                                                                                                                                                                                                                           | 1 | (1) ATBUTH College of Nursing Sciences, Bauchi | 2 | (2) Adamu College of Nursing Sciences, Azare Bauchi |   |             |   |              |   |              |   |            |   |               |   |             |   |               |    |            |    |               |
| 1                                                                                                                  | (1) ATBUTH College of Nursing Sciences, Bauchi               |                                                                                                                                                                                                                                                                                                                                                                                                                                                                                                                                                                                                                                                                       |                                                                                                                                                                                                                                                                                                                                                                                                                                                                                                                        |   |                                                |   |                                                     |   |             |   |              |   |              |   |            |   |               |   |             |   |               |    |            |    |               |
| 2                                                                                                                  | (2) Adamu College of Nursing Sciences, Azare Bauchi          |                                                                                                                                                                                                                                                                                                                                                                                                                                                                                                                                                                                                                                                                       |                                                                                                                                                                                                                                                                                                                                                                                                                                                                                                                        |   |                                                |   |                                                     |   |             |   |              |   |              |   |            |   |               |   |             |   |               |    |            |    |               |

|     |                                                           |                              |                                                                                                                                                  |
|-----|-----------------------------------------------------------|------------------------------|--------------------------------------------------------------------------------------------------------------------------------------------------|
| 954 | [ c_aa01c ]<br>Show the field ONLY if:<br>[c_aa01] = '3'  | 1c. Borno state facilities   | dropdown, Required<br>1 (1) Borno State College of Nursing Sciences, Maiduguri<br>2 (2) University of Maiduguri College of Nursing Sciences      |
| 955 | [ c_aa01d ]                                               | 1d. Ebonyi state facilities  | dropdown, Required<br>1 (1) College of Nursing Sciences, Abakaliki<br>2 (2) College of Nursing Sciences, Uburu                                   |
| 956 | [ c_aa01e ]<br>Show the field ONLY if:<br>[c_aa01] = '5'  | 1e. Kaduna state facilities  | dropdown, Required<br>1 (1) College of Nursing Sciences, Tudun Wada, Kaduna<br>2 (2) College of Nursing Sciences, ABUTH, Zaria                   |
| 957 | [ c_aa01f ]<br>Show the field ONLY if:<br>[c_aa01] = '6'  | 1f. Kano state facilities    | dropdown, Required<br>1 (1) College of Nursing Sciences, Kano<br>2 (2) College of Nursing Sciences, Gwarzo Kano                                  |
| 958 | [ c_aa01g ]<br>Show the field ONLY if:<br>[c_aa01] = '7'  | 1g. Katsina state facilities | dropdown, Required<br>1 (1) Katsina State College of Nursing Sciences, Katsina<br>2 (2) Nana Bojo College of Nursing Sciences, Malumfashi Campus |
| 959 | [ c_aa01h ]<br>Show the field ONLY if:<br>[c_aa01] = '8'  | 1h. Niger state facilities   | dropdown, Required<br>1 (1) College of Nursing Sciences, Bida<br>2 (2) College of Nursing Sciences, Kontagora                                    |
| 960 | [ c_aa01i ]<br>Show the field ONLY if:<br>[c_aa01] = '9'  | 1i. Plateau state facilities | dropdown, Required<br>1 (1) College of Nursing Sciences, VOM<br>2 (2) College of Nursing Sciences, JUTH, JOS                                     |
| 961 | [ c_aa01j ]<br>Show the field ONLY if:<br>[c_aa01] = '10' | 1j. Yobe state facilities    | dropdown, Required<br>1 (1) Shehu Sule College of Nursing Sciences, Damatutru<br>2 (2) College of Nursing Sciences, FMC, Nguru                   |
| 962 | [ c_aa01k ]<br>Show the field ONLY if:<br>[c_aa01] = '11' | 1k. Zamfara state facilities | dropdown, Required<br>1 (1) College of Nursing Sciences, Gusau                                                                                   |

|     |                         |                                                                                                                                                                                                                                                                                                                                                                                                                                                                                                                                                                                                                                                                                                                                                                                                                                                                                                                                                                                                                                                                                                                                                                                                                                                                                                                                                                                                                                                                                                                                                          |                                                                                                                                                                                                 |   |                         |   |                |   |              |
|-----|-------------------------|----------------------------------------------------------------------------------------------------------------------------------------------------------------------------------------------------------------------------------------------------------------------------------------------------------------------------------------------------------------------------------------------------------------------------------------------------------------------------------------------------------------------------------------------------------------------------------------------------------------------------------------------------------------------------------------------------------------------------------------------------------------------------------------------------------------------------------------------------------------------------------------------------------------------------------------------------------------------------------------------------------------------------------------------------------------------------------------------------------------------------------------------------------------------------------------------------------------------------------------------------------------------------------------------------------------------------------------------------------------------------------------------------------------------------------------------------------------------------------------------------------------------------------------------------------|-------------------------------------------------------------------------------------------------------------------------------------------------------------------------------------------------|---|-------------------------|---|----------------|---|--------------|
| 963 | [ c_aa02 ]              | 2. Who is taking part?                                                                                                                                                                                                                                                                                                                                                                                                                                                                                                                                                                                                                                                                                                                                                                                                                                                                                                                                                                                                                                                                                                                                                                                                                                                                                                                                                                                                                                                                                                                                   | radio, Required<br><table border="1"> <tr> <td>1</td> <td>Midwifery Educator (ME)</td> </tr> <tr> <td>2</td> <td>Preceptor (PR)</td> </tr> <tr> <td>3</td> <td>Student (ST)</td> </tr> </table> | 1 | Midwifery Educator (ME) | 2 | Preceptor (PR) | 3 | Student (ST) |
| 1   | Midwifery Educator (ME) |                                                                                                                                                                                                                                                                                                                                                                                                                                                                                                                                                                                                                                                                                                                                                                                                                                                                                                                                                                                                                                                                                                                                                                                                                                                                                                                                                                                                                                                                                                                                                          |                                                                                                                                                                                                 |   |                         |   |                |   |              |
| 2   | Preceptor (PR)          |                                                                                                                                                                                                                                                                                                                                                                                                                                                                                                                                                                                                                                                                                                                                                                                                                                                                                                                                                                                                                                                                                                                                                                                                                                                                                                                                                                                                                                                                                                                                                          |                                                                                                                                                                                                 |   |                         |   |                |   |              |
| 3   | Student (ST)            |                                                                                                                                                                                                                                                                                                                                                                                                                                                                                                                                                                                                                                                                                                                                                                                                                                                                                                                                                                                                                                                                                                                                                                                                                                                                                                                                                                                                                                                                                                                                                          |                                                                                                                                                                                                 |   |                         |   |                |   |              |
| 964 | [ c_aa03 ]              | 3. Participant UID<br><i>Example: State-Institution-assessed-no. (AKW-1-ME-01)</i>                                                                                                                                                                                                                                                                                                                                                                                                                                                                                                                                                                                                                                                                                                                                                                                                                                                                                                                                                                                                                                                                                                                                                                                                                                                                                                                                                                                                                                                                       | text, Required                                                                                                                                                                                  |   |                         |   |                |   |              |
| 965 | [ c_aa04 ]              | 4. Name of assessor                                                                                                                                                                                                                                                                                                                                                                                                                                                                                                                                                                                                                                                                                                                                                                                                                                                                                                                                                                                                                                                                                                                                                                                                                                                                                                                                                                                                                                                                                                                                      | text, Required                                                                                                                                                                                  |   |                         |   |                |   |              |
| 966 | [ c_a01x_preceptors ]   | UID: [c_aa02] Marks Participant Score<br>Question: Please describe what preparations you would make for the baby's arrival. Answer: Wash hands Ensure bag and mask work Turn the heater on Ensure hat, and towels are available 3 {c_a01_preceptors} Pass the baby (the mannequin) to the participant. Question: The baby is floppy and unresponsive, please demonstrate what you do. Answer: Place on a warmer Dry and wrap in a fresh towel (Dry with one towel, discard the wet towel, wrap in a second dry towel) Put the hat on 3 {c_a02_preceptors} Question: What else will you do? Answer: Place the baby in a neutral position (Fold the third towel and put it under the baby's shoulder) Open the airway (gentle head tilt and chin lift) Assess heart rate with the stethoscope 3 {c_a03_preceptors} Question: The baby is not breathing, has a Heart Rate of 90bpm and is blue. What would you do next? Answer: Choose the correct size bag and mask Assemble and position them correctly on the baby's face (Cover mouth and nose with the mask) 3 {c_a04_preceptors} Give 5 inflation breaths of 2-3 seconds each 2 {c_a05_preceptors} Reassess heart rate 2 {c_a06_preceptors} Question: The heart rate is 110 bpm, but there is little respiratory effort; what would you do? Answer: Continue ventilations 30-40/min 2 {c_a07_preceptors} Question: Once the baby is well and stable, what care could you suggest to the mother? Answer: Skin-to-skin contact with mother care. 2 {c_a08_preceptors} Total Score 20 {c_a09_preceptors} | descriptive                                                                                                                                                                                     |   |                         |   |                |   |              |
| 967 | [ c_a01_preceptors ]    | 1. Please describe what preparations you would make for the baby's arrival                                                                                                                                                                                                                                                                                                                                                                                                                                                                                                                                                                                                                                                                                                                                                                                                                                                                                                                                                                                                                                                                                                                                                                                                                                                                                                                                                                                                                                                                               | text (integer, Min: 0, Max: 3), Required                                                                                                                                                        |   |                         |   |                |   |              |
| 968 | [ c_a02_preceptors ]    | 2. The baby is floppy and unresponsive, please demonstrate what you do                                                                                                                                                                                                                                                                                                                                                                                                                                                                                                                                                                                                                                                                                                                                                                                                                                                                                                                                                                                                                                                                                                                                                                                                                                                                                                                                                                                                                                                                                   | text (integer, Min: 0, Max: 3), Required                                                                                                                                                        |   |                         |   |                |   |              |

|                                                                             |                                                      |                                                                                              |                                                                                                                                                                                                    |   |            |   |            |   |          |
|-----------------------------------------------------------------------------|------------------------------------------------------|----------------------------------------------------------------------------------------------|----------------------------------------------------------------------------------------------------------------------------------------------------------------------------------------------------|---|------------|---|------------|---|----------|
| 969                                                                         | [c_a03_preceptors]                                   | 3. What else will you do?                                                                    | text (integer, Min: 0, Max: 3), Required                                                                                                                                                           |   |            |   |            |   |          |
| 970                                                                         | [c_a04_preceptors]                                   | 4. The baby is not breathing, has a Heart Rate of 90bpm and is blue. What would you do next? | text (integer, Min: 0, Max: 3), Required                                                                                                                                                           |   |            |   |            |   |          |
| 971                                                                         | [c_a05_preceptors]                                   | 5. Give 5 inflation breaths of 2-3 seconds each                                              | text (integer, Min: 0, Max: 2), Required                                                                                                                                                           |   |            |   |            |   |          |
| 972                                                                         | [c_a06_preceptors]                                   | 6. Reassess heart rate                                                                       | text (integer, Min: 0, Max: 2), Required                                                                                                                                                           |   |            |   |            |   |          |
| 973                                                                         | [c_a07_preceptors]                                   | 7. The heart rate is 110 bpm, but there is little respiratory effort; what would you do?     | text (integer, Min: 0, Max: 2), Required                                                                                                                                                           |   |            |   |            |   |          |
| 974                                                                         | [c_a08_preceptors]                                   | 8. Once the baby is well and stable, what care could you suggest to the mother?              | text (integer, Min: 0, Max: 2), Required                                                                                                                                                           |   |            |   |            |   |          |
| 975                                                                         | [c_a09_preceptors]                                   | 9. Total Score                                                                               | calc, Required<br>Calculation: sum([c_a01_preceptors], [c_a02_preceptors], [c_a03_preceptors], [c_a04_preceptors], [c_a05_preceptors], [c_a06_preceptors], [c_a07_preceptors], [c_a08_preceptors]) |   |            |   |            |   |          |
| 976                                                                         | [c_a10_studentpreceptors]                            | 10. Faculty comments                                                                         | notes, Required                                                                                                                                                                                    |   |            |   |            |   |          |
| 977                                                                         | [osce_basic_life_support_of_the_newborn_v1_complete] | Section Header: <i>Form Status</i><br>Complete?                                              | dropdown<br><table border="1"> <tr> <td>0</td> <td>Incomplete</td> </tr> <tr> <td>1</td> <td>Unverified</td> </tr> <tr> <td>2</td> <td>Complete</td> </tr> </table>                                | 0 | Incomplete | 1 | Unverified | 2 | Complete |
| 0                                                                           | Incomplete                                           |                                                                                              |                                                                                                                                                                                                    |   |            |   |            |   |          |
| 1                                                                           | Unverified                                           |                                                                                              |                                                                                                                                                                                                    |   |            |   |            |   |          |
| 2                                                                           | Complete                                             |                                                                                              |                                                                                                                                                                                                    |   |            |   |            |   |          |
| Instrument: OSCE Management Of PPH_V1 (osce_management_of_pph_v1)           |                                                      |                                                                                              | [collapsed]                                                                                                                                                                                        |   |            |   |            |   |          |
| Instrument: OSCE Labour Care Guide (LCG)_V1 (osce_labour_care_guide_lcg_v1) |                                                      |                                                                                              | [collapsed]                                                                                                                                                                                        |   |            |   |            |   |          |

# Data Dictionary Codebook

| #                                                                                                                    | Variable / Field Name                     | Field Label<br><i>Field Note</i>                                                                                                                                                                                                                                                                                                                                                                                                                                                                                                                                                                                                                                                                                                                                                                                                                                                                                                                                                                                      | Field Attributes (Field Type, Validation, Choices, Calculations, etc.)                                                                                                                                                                                                                                                                                                                                                                                                                                                     |   |                                           |   |              |   |             |   |              |   |              |   |            |   |               |   |             |   |               |    |            |    |               |
|----------------------------------------------------------------------------------------------------------------------|-------------------------------------------|-----------------------------------------------------------------------------------------------------------------------------------------------------------------------------------------------------------------------------------------------------------------------------------------------------------------------------------------------------------------------------------------------------------------------------------------------------------------------------------------------------------------------------------------------------------------------------------------------------------------------------------------------------------------------------------------------------------------------------------------------------------------------------------------------------------------------------------------------------------------------------------------------------------------------------------------------------------------------------------------------------------------------|----------------------------------------------------------------------------------------------------------------------------------------------------------------------------------------------------------------------------------------------------------------------------------------------------------------------------------------------------------------------------------------------------------------------------------------------------------------------------------------------------------------------------|---|-------------------------------------------|---|--------------|---|-------------|---|--------------|---|--------------|---|------------|---|---------------|---|-------------|---|---------------|----|------------|----|---------------|
| Instrument: <b>Students Maternal Shock Scenario</b> (students_maternal_shock_scenario) [collapsed]                   |                                           |                                                                                                                                                                                                                                                                                                                                                                                                                                                                                                                                                                                                                                                                                                                                                                                                                                                                                                                                                                                                                       |                                                                                                                                                                                                                                                                                                                                                                                                                                                                                                                            |   |                                           |   |              |   |             |   |              |   |              |   |            |   |               |   |             |   |               |    |            |    |               |
| Instrument: <b>BMGF Nigeria Maternal Mortality Baseline</b> (bmgf_nigeria_maternal_mortality_baseline) [collapsed]   |                                           |                                                                                                                                                                                                                                                                                                                                                                                                                                                                                                                                                                                                                                                                                                                                                                                                                                                                                                                                                                                                                       |                                                                                                                                                                                                                                                                                                                                                                                                                                                                                                                            |   |                                           |   |              |   |             |   |              |   |              |   |            |   |               |   |             |   |               |    |            |    |               |
| Instrument: <b>Data demo</b> (data_demo) [collapsed]                                                                 |                                           |                                                                                                                                                                                                                                                                                                                                                                                                                                                                                                                                                                                                                                                                                                                                                                                                                                                                                                                                                                                                                       |                                                                                                                                                                                                                                                                                                                                                                                                                                                                                                                            |   |                                           |   |              |   |             |   |              |   |              |   |            |   |               |   |             |   |               |    |            |    |               |
| Instrument: <b>Institutional assessment tool_V2</b> (institutional_assessment_tool_v2) [collapsed]                   |                                           |                                                                                                                                                                                                                                                                                                                                                                                                                                                                                                                                                                                                                                                                                                                                                                                                                                                                                                                                                                                                                       |                                                                                                                                                                                                                                                                                                                                                                                                                                                                                                                            |   |                                           |   |              |   |             |   |              |   |              |   |            |   |               |   |             |   |               |    |            |    |               |
| Instrument: <b>Teaching Observation Form_V2</b> (teaching_observation_form_v2) [collapsed]                           |                                           |                                                                                                                                                                                                                                                                                                                                                                                                                                                                                                                                                                                                                                                                                                                                                                                                                                                                                                                                                                                                                       |                                                                                                                                                                                                                                                                                                                                                                                                                                                                                                                            |   |                                           |   |              |   |             |   |              |   |              |   |            |   |               |   |             |   |               |    |            |    |               |
| Instrument: <b>Staff retention initial online survey</b> (staff_retention_initial_online_survey) [collapsed]         |                                           |                                                                                                                                                                                                                                                                                                                                                                                                                                                                                                                                                                                                                                                                                                                                                                                                                                                                                                                                                                                                                       |                                                                                                                                                                                                                                                                                                                                                                                                                                                                                                                            |   |                                           |   |              |   |             |   |              |   |              |   |            |   |               |   |             |   |               |    |            |    |               |
| Instrument: <b>NMCN checklist tool_2025</b> (nmcn_checklist_tool_2025) [collapsed]                                   |                                           |                                                                                                                                                                                                                                                                                                                                                                                                                                                                                                                                                                                                                                                                                                                                                                                                                                                                                                                                                                                                                       |                                                                                                                                                                                                                                                                                                                                                                                                                                                                                                                            |   |                                           |   |              |   |             |   |              |   |              |   |            |   |               |   |             |   |               |    |            |    |               |
| Instrument: <b>OSCE Basic Life Support Of The Newborn V2</b> (osce_basic_life_support_of_the_newborn_v2) [collapsed] |                                           |                                                                                                                                                                                                                                                                                                                                                                                                                                                                                                                                                                                                                                                                                                                                                                                                                                                                                                                                                                                                                       |                                                                                                                                                                                                                                                                                                                                                                                                                                                                                                                            |   |                                           |   |              |   |             |   |              |   |              |   |            |   |               |   |             |   |               |    |            |    |               |
| Instrument: <b>OSCE Management Of PPH_V3</b> (osce_management_of_pph_v3)                                             |                                           |                                                                                                                                                                                                                                                                                                                                                                                                                                                                                                                                                                                                                                                                                                                                                                                                                                                                                                                                                                                                                       |                                                                                                                                                                                                                                                                                                                                                                                                                                                                                                                            |   |                                           |   |              |   |             |   |              |   |              |   |            |   |               |   |             |   |               |    |            |    |               |
| 1002                                                                                                                 | [d_aa01]                                  | <p>Section Header: <i>Skill 2: Management of Post-Partum Haemorrhage Equipment Needed: Resuscitation model (little Annie); Adult valve bag/mask (Ambu bag), Stethoscope, Grey cannulae, IVF Normal saline/ringers' lactate, syringe labelled oxytocic's, IV giving set, catheter, urine bag Scenario (10mins) A 35-year-old G9P7+1, 4 alive, delivered 30 minutes ago through a spontaneous vaginal delivery of a live female baby with Apgar scores 8 and 9 at 1 and five minutes, respectively. She was given IV 10IU of Oxytocin immediately after delivery. The placenta was delivered complete by controlled cord traction. She was transferred to the post-delivery ward and is unable to initiate breast feeding as her baby has been taken to NICU. You have just arrived in the post-delivery ward, and you find the woman in a pool of blood. Question (Give whole marks if participants mention all the answers, Give whole marks only, no decimal places)- TOTAL 20 marks</i></p> <p>1. Name of state</p> | <p>dropdown, Required</p> <table border="1"> <tr><td>1</td><td>Akwa Ibom (AKW)</td></tr> <tr><td>2</td><td>Bauchi (BAU)</td></tr> <tr><td>3</td><td>Borno (BOR)</td></tr> <tr><td>4</td><td>Ebonyi (EBO)</td></tr> <tr><td>5</td><td>Kaduna (KAD)</td></tr> <tr><td>6</td><td>Kano (KAU)</td></tr> <tr><td>7</td><td>Katsina (KAT)</td></tr> <tr><td>8</td><td>Niger (NIG)</td></tr> <tr><td>9</td><td>Plateau (PLT)</td></tr> <tr><td>10</td><td>Yobe (YOB)</td></tr> <tr><td>11</td><td>Zamfara (ZAM)</td></tr> </table> | 1 | Akwa Ibom (AKW)                           | 2 | Bauchi (BAU) | 3 | Borno (BOR) | 4 | Ebonyi (EBO) | 5 | Kaduna (KAD) | 6 | Kano (KAU) | 7 | Katsina (KAT) | 8 | Niger (NIG) | 9 | Plateau (PLT) | 10 | Yobe (YOB) | 11 | Zamfara (ZAM) |
| 1                                                                                                                    | Akwa Ibom (AKW)                           |                                                                                                                                                                                                                                                                                                                                                                                                                                                                                                                                                                                                                                                                                                                                                                                                                                                                                                                                                                                                                       |                                                                                                                                                                                                                                                                                                                                                                                                                                                                                                                            |   |                                           |   |              |   |             |   |              |   |              |   |            |   |               |   |             |   |               |    |            |    |               |
| 2                                                                                                                    | Bauchi (BAU)                              |                                                                                                                                                                                                                                                                                                                                                                                                                                                                                                                                                                                                                                                                                                                                                                                                                                                                                                                                                                                                                       |                                                                                                                                                                                                                                                                                                                                                                                                                                                                                                                            |   |                                           |   |              |   |             |   |              |   |              |   |            |   |               |   |             |   |               |    |            |    |               |
| 3                                                                                                                    | Borno (BOR)                               |                                                                                                                                                                                                                                                                                                                                                                                                                                                                                                                                                                                                                                                                                                                                                                                                                                                                                                                                                                                                                       |                                                                                                                                                                                                                                                                                                                                                                                                                                                                                                                            |   |                                           |   |              |   |             |   |              |   |              |   |            |   |               |   |             |   |               |    |            |    |               |
| 4                                                                                                                    | Ebonyi (EBO)                              |                                                                                                                                                                                                                                                                                                                                                                                                                                                                                                                                                                                                                                                                                                                                                                                                                                                                                                                                                                                                                       |                                                                                                                                                                                                                                                                                                                                                                                                                                                                                                                            |   |                                           |   |              |   |             |   |              |   |              |   |            |   |               |   |             |   |               |    |            |    |               |
| 5                                                                                                                    | Kaduna (KAD)                              |                                                                                                                                                                                                                                                                                                                                                                                                                                                                                                                                                                                                                                                                                                                                                                                                                                                                                                                                                                                                                       |                                                                                                                                                                                                                                                                                                                                                                                                                                                                                                                            |   |                                           |   |              |   |             |   |              |   |              |   |            |   |               |   |             |   |               |    |            |    |               |
| 6                                                                                                                    | Kano (KAU)                                |                                                                                                                                                                                                                                                                                                                                                                                                                                                                                                                                                                                                                                                                                                                                                                                                                                                                                                                                                                                                                       |                                                                                                                                                                                                                                                                                                                                                                                                                                                                                                                            |   |                                           |   |              |   |             |   |              |   |              |   |            |   |               |   |             |   |               |    |            |    |               |
| 7                                                                                                                    | Katsina (KAT)                             |                                                                                                                                                                                                                                                                                                                                                                                                                                                                                                                                                                                                                                                                                                                                                                                                                                                                                                                                                                                                                       |                                                                                                                                                                                                                                                                                                                                                                                                                                                                                                                            |   |                                           |   |              |   |             |   |              |   |              |   |            |   |               |   |             |   |               |    |            |    |               |
| 8                                                                                                                    | Niger (NIG)                               |                                                                                                                                                                                                                                                                                                                                                                                                                                                                                                                                                                                                                                                                                                                                                                                                                                                                                                                                                                                                                       |                                                                                                                                                                                                                                                                                                                                                                                                                                                                                                                            |   |                                           |   |              |   |             |   |              |   |              |   |            |   |               |   |             |   |               |    |            |    |               |
| 9                                                                                                                    | Plateau (PLT)                             |                                                                                                                                                                                                                                                                                                                                                                                                                                                                                                                                                                                                                                                                                                                                                                                                                                                                                                                                                                                                                       |                                                                                                                                                                                                                                                                                                                                                                                                                                                                                                                            |   |                                           |   |              |   |             |   |              |   |              |   |            |   |               |   |             |   |               |    |            |    |               |
| 10                                                                                                                   | Yobe (YOB)                                |                                                                                                                                                                                                                                                                                                                                                                                                                                                                                                                                                                                                                                                                                                                                                                                                                                                                                                                                                                                                                       |                                                                                                                                                                                                                                                                                                                                                                                                                                                                                                                            |   |                                           |   |              |   |             |   |              |   |              |   |            |   |               |   |             |   |               |    |            |    |               |
| 11                                                                                                                   | Zamfara (ZAM)                             |                                                                                                                                                                                                                                                                                                                                                                                                                                                                                                                                                                                                                                                                                                                                                                                                                                                                                                                                                                                                                       |                                                                                                                                                                                                                                                                                                                                                                                                                                                                                                                            |   |                                           |   |              |   |             |   |              |   |              |   |            |   |               |   |             |   |               |    |            |    |               |
| 1003                                                                                                                 | [d_aa01a]                                 | <p>1a. Akwa Ibom state facilities</p>                                                                                                                                                                                                                                                                                                                                                                                                                                                                                                                                                                                                                                                                                                                                                                                                                                                                                                                                                                                 | <p>dropdown, Required</p> <table border="1"> <tr><td>1</td><td>(1) College of Nursing Sciences, Anua Uyo</td></tr> </table>                                                                                                                                                                                                                                                                                                                                                                                                | 1 | (1) College of Nursing Sciences, Anua Uyo |   |              |   |             |   |              |   |              |   |            |   |               |   |             |   |               |    |            |    |               |
| 1                                                                                                                    | (1) College of Nursing Sciences, Anua Uyo |                                                                                                                                                                                                                                                                                                                                                                                                                                                                                                                                                                                                                                                                                                                                                                                                                                                                                                                                                                                                                       |                                                                                                                                                                                                                                                                                                                                                                                                                                                                                                                            |   |                                           |   |              |   |             |   |              |   |              |   |            |   |               |   |             |   |               |    |            |    |               |
|                                                                                                                      | Show the field ONLY if: [d_aa01] = '1'    |                                                                                                                                                                                                                                                                                                                                                                                                                                                                                                                                                                                                                                                                                                                                                                                                                                                                                                                                                                                                                       |                                                                                                                                                                                                                                                                                                                                                                                                                                                                                                                            |   |                                           |   |              |   |             |   |              |   |              |   |            |   |               |   |             |   |               |    |            |    |               |

|      |                                                                       |                              |                                                                                                                                                                                                                                                                                                                                                                         |   |                                                        |   |                                                              |
|------|-----------------------------------------------------------------------|------------------------------|-------------------------------------------------------------------------------------------------------------------------------------------------------------------------------------------------------------------------------------------------------------------------------------------------------------------------------------------------------------------------|---|--------------------------------------------------------|---|--------------------------------------------------------------|
| 1004 | <p>[ d_aa01b ]</p> <p>Show the field ONLY if:<br/>[d_aa01] = '2'</p>  | 1b. Bauchi state facilities  | <p>dropdown, Required</p> <table border="1"> <tr> <td data-bbox="1029 120 1070 210">1</td> <td data-bbox="1070 120 1501 210">(1) ATBUTH College of Nursing Sciences, Bauchi</td> </tr> <tr> <td data-bbox="1029 210 1070 300">2</td> <td data-bbox="1070 210 1501 300">(2) Adamu College of Nursing Sciences, Azare Bauchi</td> </tr> </table>                          | 1 | (1) ATBUTH College of Nursing Sciences, Bauchi         | 2 | (2) Adamu College of Nursing Sciences, Azare Bauchi          |
| 1    | (1) ATBUTH College of Nursing Sciences, Bauchi                        |                              |                                                                                                                                                                                                                                                                                                                                                                         |   |                                                        |   |                                                              |
| 2    | (2) Adamu College of Nursing Sciences, Azare Bauchi                   |                              |                                                                                                                                                                                                                                                                                                                                                                         |   |                                                        |   |                                                              |
| 1005 | <p>[ d_aa01c ]</p> <p>Show the field ONLY if:<br/>[d_aa01] = '3'</p>  | 1c. Borno state facilities   | <p>dropdown, Required</p> <table border="1"> <tr> <td data-bbox="1029 353 1070 443">1</td> <td data-bbox="1070 353 1501 443">(1) Borno State College of Nursing Sciences, Maiduguri</td> </tr> <tr> <td data-bbox="1029 443 1070 533">2</td> <td data-bbox="1070 443 1501 533">(2) University of Maiduguri College of Nursing Sciences</td> </tr> </table>              | 1 | (1) Borno State College of Nursing Sciences, Maiduguri | 2 | (2) University of Maiduguri College of Nursing Sciences      |
| 1    | (1) Borno State College of Nursing Sciences, Maiduguri                |                              |                                                                                                                                                                                                                                                                                                                                                                         |   |                                                        |   |                                                              |
| 2    | (2) University of Maiduguri College of Nursing Sciences               |                              |                                                                                                                                                                                                                                                                                                                                                                         |   |                                                        |   |                                                              |
| 1006 | <p>[ d_aa01d ]</p> <p>Show the field ONLY if:<br/>[d_aa01] = '4'</p>  | 1d. Ebonyi state facilities  | <p>dropdown, Required</p> <table border="1"> <tr> <td data-bbox="1029 586 1070 676">1</td> <td data-bbox="1070 586 1501 676">(1) College of Nursing Sciences, Abakaliki</td> </tr> <tr> <td data-bbox="1029 676 1070 766">2</td> <td data-bbox="1070 676 1501 766">(2) College of Nursing Sciences, Uburu</td> </tr> </table>                                           | 1 | (1) College of Nursing Sciences, Abakaliki             | 2 | (2) College of Nursing Sciences, Uburu                       |
| 1    | (1) College of Nursing Sciences, Abakaliki                            |                              |                                                                                                                                                                                                                                                                                                                                                                         |   |                                                        |   |                                                              |
| 2    | (2) College of Nursing Sciences, Uburu                                |                              |                                                                                                                                                                                                                                                                                                                                                                         |   |                                                        |   |                                                              |
| 1007 | <p>[ d_aa01e ]</p> <p>Show the field ONLY if:<br/>[d_aa01] = '5'</p>  | 1e. Kaduna state facilities  | <p>dropdown, Required</p> <table border="1"> <tr> <td data-bbox="1029 819 1070 909">1</td> <td data-bbox="1070 819 1501 909">(1) College of Nursing Sciences, Tudun Wada, Kaduna</td> </tr> <tr> <td data-bbox="1029 909 1070 999">2</td> <td data-bbox="1070 909 1501 999">(2) College of Nursing Sciences, ABUTH, Zaria</td> </tr> </table>                           | 1 | (1) College of Nursing Sciences, Tudun Wada, Kaduna    | 2 | (2) College of Nursing Sciences, ABUTH, Zaria                |
| 1    | (1) College of Nursing Sciences, Tudun Wada, Kaduna                   |                              |                                                                                                                                                                                                                                                                                                                                                                         |   |                                                        |   |                                                              |
| 2    | (2) College of Nursing Sciences, ABUTH, Zaria                         |                              |                                                                                                                                                                                                                                                                                                                                                                         |   |                                                        |   |                                                              |
| 1008 | <p>[ d_aa01f ]</p> <p>Show the field ONLY if:<br/>[d_aa01] = '6'</p>  | 1f. Kano state facilities    | <p>dropdown, Required</p> <table border="1"> <tr> <td data-bbox="1029 1061 1070 1151">1</td> <td data-bbox="1070 1061 1501 1151">(1) College of Nursing Sciences, Kano</td> </tr> <tr> <td data-bbox="1029 1151 1070 1240">2</td> <td data-bbox="1070 1151 1501 1240">(2) College of Nursing Sciences, Gwarzo Kano</td> </tr> </table>                                  | 1 | (1) College of Nursing Sciences, Kano                  | 2 | (2) College of Nursing Sciences, Gwarzo Kano                 |
| 1    | (1) College of Nursing Sciences, Kano                                 |                              |                                                                                                                                                                                                                                                                                                                                                                         |   |                                                        |   |                                                              |
| 2    | (2) College of Nursing Sciences, Gwarzo Kano                          |                              |                                                                                                                                                                                                                                                                                                                                                                         |   |                                                        |   |                                                              |
| 1009 | <p>[ d_aa01g ]</p> <p>Show the field ONLY if:<br/>[d_aa01] = '7'</p>  | 1g. Katsina state facilities | <p>dropdown, Required</p> <table border="1"> <tr> <td data-bbox="1029 1285 1070 1375">1</td> <td data-bbox="1070 1285 1501 1375">(1) Katsina State College of Nursing Sciences, Katsina</td> </tr> <tr> <td data-bbox="1029 1375 1070 1464">2</td> <td data-bbox="1070 1375 1501 1464">(2) Nana Bojo College of Nursing Sciences, Malumfashi Campus</td> </tr> </table> | 1 | (1) Katsina State College of Nursing Sciences, Katsina | 2 | (2) Nana Bojo College of Nursing Sciences, Malumfashi Campus |
| 1    | (1) Katsina State College of Nursing Sciences, Katsina                |                              |                                                                                                                                                                                                                                                                                                                                                                         |   |                                                        |   |                                                              |
| 2    | (2) Nana Bojo College of Nursing Sciences, Malumfashi Campus          |                              |                                                                                                                                                                                                                                                                                                                                                                         |   |                                                        |   |                                                              |
| 1010 | <p>[ d_aa01h ]</p> <p>Show the field ONLY if:<br/>[d_aa01] = '8'</p>  | 1h. Niger state facilities   | <p>dropdown, Required</p> <table border="1"> <tr> <td data-bbox="1029 1518 1070 1608">1</td> <td data-bbox="1070 1518 1501 1608">(1) College of Nursing Sciences, Bida</td> </tr> <tr> <td data-bbox="1029 1608 1070 1697">2</td> <td data-bbox="1070 1608 1501 1697">(2) College of Nursing Sciences, Kontagora</td> </tr> </table>                                    | 1 | (1) College of Nursing Sciences, Bida                  | 2 | (2) College of Nursing Sciences, Kontagora                   |
| 1    | (1) College of Nursing Sciences, Bida                                 |                              |                                                                                                                                                                                                                                                                                                                                                                         |   |                                                        |   |                                                              |
| 2    | (2) College of Nursing Sciences, Kontagora                            |                              |                                                                                                                                                                                                                                                                                                                                                                         |   |                                                        |   |                                                              |
| 1011 | <p>[ d_aa01i ]</p> <p>Show the field ONLY if:<br/>[d_aa01] = '9'</p>  | 1i. Plateau state facilities | <p>dropdown, Required</p> <table border="1"> <tr> <td data-bbox="1029 1760 1070 1850">1</td> <td data-bbox="1070 1760 1501 1850">(1) College of Nursing Sciences, VOM</td> </tr> <tr> <td data-bbox="1029 1850 1070 1939">2</td> <td data-bbox="1070 1850 1501 1939">(2) College of Nursing Sciences, JUTH, JOS</td> </tr> </table>                                     | 1 | (1) College of Nursing Sciences, VOM                   | 2 | (2) College of Nursing Sciences, JUTH, JOS                   |
| 1    | (1) College of Nursing Sciences, VOM                                  |                              |                                                                                                                                                                                                                                                                                                                                                                         |   |                                                        |   |                                                              |
| 2    | (2) College of Nursing Sciences, JUTH, JOS                            |                              |                                                                                                                                                                                                                                                                                                                                                                         |   |                                                        |   |                                                              |
| 1012 | <p>[ d_aa01j ]</p> <p>Show the field ONLY if:<br/>[d_aa01] = '10'</p> | 1j. Yobe state facilities    | <p>dropdown, Required</p> <table border="1"> <tr> <td data-bbox="1029 1984 1070 2074">1</td> <td data-bbox="1070 1984 1501 2074">(1) Shehu Sule College of Nursing Sciences, Damatutru</td> </tr> </table>                                                                                                                                                              | 1 | (1) Shehu Sule College of Nursing Sciences, Damatutru  |   |                                                              |
| 1    | (1) Shehu Sule College of Nursing Sciences, Damatutru                 |                              |                                                                                                                                                                                                                                                                                                                                                                         |   |                                                        |   |                                                              |

|      |                                                        |                                                                                                                                                                                                                                                                                                                                                                                                                                                                                                                                                                                                                                                                                                                                                                                                                                                                                                                                                                                                                                                                                                                                                                                                                                                                                                                                                                                                                                                      |                                                                                    |
|------|--------------------------------------------------------|------------------------------------------------------------------------------------------------------------------------------------------------------------------------------------------------------------------------------------------------------------------------------------------------------------------------------------------------------------------------------------------------------------------------------------------------------------------------------------------------------------------------------------------------------------------------------------------------------------------------------------------------------------------------------------------------------------------------------------------------------------------------------------------------------------------------------------------------------------------------------------------------------------------------------------------------------------------------------------------------------------------------------------------------------------------------------------------------------------------------------------------------------------------------------------------------------------------------------------------------------------------------------------------------------------------------------------------------------------------------------------------------------------------------------------------------------|------------------------------------------------------------------------------------|
|      |                                                        |                                                                                                                                                                                                                                                                                                                                                                                                                                                                                                                                                                                                                                                                                                                                                                                                                                                                                                                                                                                                                                                                                                                                                                                                                                                                                                                                                                                                                                                      | 2 (2) College of Nursing Sciences, FMC, Nguru                                      |
| 1013 | [ d_aa01k ]<br>Show the field ONLY if: [d_aa01] = '11' | 1k. Zamfara state facilities                                                                                                                                                                                                                                                                                                                                                                                                                                                                                                                                                                                                                                                                                                                                                                                                                                                                                                                                                                                                                                                                                                                                                                                                                                                                                                                                                                                                                         | dropdown, Required<br>1 (1) College of Nursing Sciences, Gusau                     |
| 1014 | [ d_aa02 ]                                             | 2. Who is taking part?                                                                                                                                                                                                                                                                                                                                                                                                                                                                                                                                                                                                                                                                                                                                                                                                                                                                                                                                                                                                                                                                                                                                                                                                                                                                                                                                                                                                                               | radio, Required<br>1 Midwifery Educator (ME)<br>2 Preceptor (PR)<br>3 Student (ST) |
| 1015 | [ d_aa03 ]                                             | 3. Participant UID<br><i>Example: State-Institution-assessed-no. (AKW-1-ME-01)</i>                                                                                                                                                                                                                                                                                                                                                                                                                                                                                                                                                                                                                                                                                                                                                                                                                                                                                                                                                                                                                                                                                                                                                                                                                                                                                                                                                                   | text, Required                                                                     |
| 1016 | [ d_aa04 ]                                             | 4. Name of assessor                                                                                                                                                                                                                                                                                                                                                                                                                                                                                                                                                                                                                                                                                                                                                                                                                                                                                                                                                                                                                                                                                                                                                                                                                                                                                                                                                                                                                                  | text, Required                                                                     |
| 1017 | [ d_a01x_pph ]                                         | UID: [d_aa03] Mark Participant Score Demonstrate what actions you will take. (2 MARKS) Expected answer Call for help and shake and shout name of women (1 mark) Look at the chest is moving, bend ear close to airways listening for breath sounds and use the dorsum of your hand to feel for air coming out of the woman's nostrils/mouth (1 mark) 2 {d_a01_pph} The patient is conscious, her respiratory rate is 20/min her PR is 98/min, BP is 100/60 mmHg: What will you do next? (3 MARKS) Expected answers (demonstrate/running commentary) Establish IV access, 2 liters of normal saline or ringers lactate in 20mins (1 mark) Group and cross match blood/save blood (1 mark) Put woman on oxygen (1 mark) 2 {d_a02_pph} What medications will you administer (2 MARKS) Expected answers (demonstrate/running commentary) Repeat oxtocin if available and of good quality, if not administer Cabeciclin, if not available administer misoprostol according to national protocol (2 marks) 2 {d_a03_pph} On examination the uterus is soft and flabby, uterine size of 22 weeks and she has no genital laceration. The blood collected via the calibrated drape is 750mls (4 MARKS) Expected answers (demonstrate/running commentary) What is the diagnosis and what immediate actions will you take? Expected answers PPH secondary to uterine atony (1 mark) Candidate describes/demonstrates uterine massage, if unsuccessful, bimanual | descriptive                                                                        |

|  |                    |                                                                                                                                                                                                                                                                                                                                                                                                                                                                                                                                                                                                                                                                                                                                                                                                                                                                                                                                                                                                                                                                                                                                                                                                                                                                                                                                                                                                                                                                               |                                          |
|--|--------------------|-------------------------------------------------------------------------------------------------------------------------------------------------------------------------------------------------------------------------------------------------------------------------------------------------------------------------------------------------------------------------------------------------------------------------------------------------------------------------------------------------------------------------------------------------------------------------------------------------------------------------------------------------------------------------------------------------------------------------------------------------------------------------------------------------------------------------------------------------------------------------------------------------------------------------------------------------------------------------------------------------------------------------------------------------------------------------------------------------------------------------------------------------------------------------------------------------------------------------------------------------------------------------------------------------------------------------------------------------------------------------------------------------------------------------------------------------------------------------------|------------------------------------------|
|  |                    | <p>uterine compression (2 marks)<br/> Administer 20-40IU oxytocin in Normal saline drip to rum slowly (1 mark) 4 {d_a04_pph} What other medication can be given (1 MARK) Expected answer IV Tranexemic acid (1 marks) 1 {d_a05_pph} What actions should have been taken at blood loss of 300mls observed in the calibrated drape (4 marks) Expected response I will institute the PPH bundle/EMOTIVE protocol: Early detection of PPH (use calibrated drape, document blood loss, trigger point is 300 and 500mls, monitor vital signs) Massage the uterus until contracted for 1 min Administer oxytocic drug Administer Tranexamic acid: Ig IV over 10min IV fluids Examination of the genital tract (empty bladder and check for tears) and escalation (if bleeding not stoping call doctor) 4 {d_a06_pph} The bleeding continues and the women's condition worsens, blood loss is now 1500mls, vitals signs are un recordable. Demonstrate the actions you will take on the mannequin. (4 MARKS) Expected answers (demonstrate/running commentary) I will commence cardio-pulmonary resuscitation, giving chest compressions at 30 for 2 breaths using the correctly applied ambu bag (Chest rising with each squeeze of the bag) (2 marks) Continue IVF and start whole blood transfusion (1 mark) Call for senior help while resuscitation continues, activate massive blood transfusion protocol if there is one (1 mark) 4 {d_a07_pph} Total Score 20 {d_a08_pph}</p> |                                          |
|  | 1018 [ d_a01_pph ] | 1. Demonstrate what actions you will take.                                                                                                                                                                                                                                                                                                                                                                                                                                                                                                                                                                                                                                                                                                                                                                                                                                                                                                                                                                                                                                                                                                                                                                                                                                                                                                                                                                                                                                    | text (integer, Min: 0, Max: 2), Required |
|  | 1019 [ d_a02_pph ] | 2. The patient is conscious, her respiratory rate is 20/min her PR is 98/min, BP is 100/60 mmHg: What will you do next?                                                                                                                                                                                                                                                                                                                                                                                                                                                                                                                                                                                                                                                                                                                                                                                                                                                                                                                                                                                                                                                                                                                                                                                                                                                                                                                                                       | text (integer, Min: 0, Max: 3), Required |
|  | 1020 [ d_a03_pph ] | 3. What medications will you administer                                                                                                                                                                                                                                                                                                                                                                                                                                                                                                                                                                                                                                                                                                                                                                                                                                                                                                                                                                                                                                                                                                                                                                                                                                                                                                                                                                                                                                       | text (integer, Min: 0, Max: 2), Required |
|  | 1021 [ d_a04_pph ] | 4. On examination the uterus is soft and flabby, uterine size of 22 weeks and she has no genital laceration. The blood collected via the calibrated drape is 750mls                                                                                                                                                                                                                                                                                                                                                                                                                                                                                                                                                                                                                                                                                                                                                                                                                                                                                                                                                                                                                                                                                                                                                                                                                                                                                                           | text (integer, Min: 0, Max: 4), Required |
|  | 1022 [ d_a05_pph ] | 5. What other medication can be given                                                                                                                                                                                                                                                                                                                                                                                                                                                                                                                                                                                                                                                                                                                                                                                                                                                                                                                                                                                                                                                                                                                                                                                                                                                                                                                                                                                                                                         | text (integer, Min: 0, Max: 1), Required |

|                                                                                    |                                        |                                                                                                                                                                               |                                                                                                                                                                     |   |            |   |            |   |          |
|------------------------------------------------------------------------------------|----------------------------------------|-------------------------------------------------------------------------------------------------------------------------------------------------------------------------------|---------------------------------------------------------------------------------------------------------------------------------------------------------------------|---|------------|---|------------|---|----------|
| 1023                                                                               | [ d_a06_pph ]                          | 6. What actions should have been taken at blood loss of 300mls observed in the calibrated drape                                                                               | text (integer, Min: 0, Max: 4), Required                                                                                                                            |   |            |   |            |   |          |
| 1024                                                                               | [ d_a07_pph ]                          | 7. The bleeding continues and the women's condition worsens, blood loss is now 1500mls, vitals signs are unrecordable. Demonstrate the actions you will take on the mannequin | text (integer, Min: 0, Max: 4), Required                                                                                                                            |   |            |   |            |   |          |
| 1025                                                                               | [ d_a08_pph ]                          | 7. Total Score                                                                                                                                                                | calc, Required<br>Calculation: sum([d_a01_pph], [d_a02_pph], [d_a03_pph], [d_a04_pph], [d_a05_pph], [d_a06_pph], [d_a07_pph])                                       |   |            |   |            |   |          |
| 1026                                                                               | [ d_a09_pph_comment ]                  | 2. Faculty Comments                                                                                                                                                           | notes, Required                                                                                                                                                     |   |            |   |            |   |          |
| 1027                                                                               | [ osce_management_of_pph_v3_complete ] | Section Header: <i>Form Status</i><br>Complete?                                                                                                                               | dropdown<br><table border="1"> <tr> <td>0</td> <td>Incomplete</td> </tr> <tr> <td>1</td> <td>Unverified</td> </tr> <tr> <td>2</td> <td>Complete</td> </tr> </table> | 0 | Incomplete | 1 | Unverified | 2 | Complete |
| 0                                                                                  | Incomplete                             |                                                                                                                                                                               |                                                                                                                                                                     |   |            |   |            |   |          |
| 1                                                                                  | Unverified                             |                                                                                                                                                                               |                                                                                                                                                                     |   |            |   |            |   |          |
| 2                                                                                  | Complete                               |                                                                                                                                                                               |                                                                                                                                                                     |   |            |   |            |   |          |
| Instrument: <b>OSCE Labour Care Guide (LCG)_V1</b> (osce_labour_care_guide_lcg_v1) |                                        |                                                                                                                                                                               | [collapsed]                                                                                                                                                         |   |            |   |            |   |          |

# Data Dictionary Codebook

2025-01-17 12:55pm

| #    | Variable / Field Name                                                                                                | Field Label<br><i>Field Note</i>                                                                                                                                                                                                                                                                                                                                                                                                                                                                                                                                                                                                                                                                                                                                                                                                                                                                                                                                                                                                                                                                                                                                                                                                                                                                                                                                                                                                                                                                                                                                             | Field Attributes (Field Type, Validation, Choices, Calculations, etc.)                                                                                                                                                                                                                                                                                                                                                                                                                                              |   |                 |   |              |   |             |   |              |   |              |   |            |   |               |   |             |   |               |    |            |    |               |
|------|----------------------------------------------------------------------------------------------------------------------|------------------------------------------------------------------------------------------------------------------------------------------------------------------------------------------------------------------------------------------------------------------------------------------------------------------------------------------------------------------------------------------------------------------------------------------------------------------------------------------------------------------------------------------------------------------------------------------------------------------------------------------------------------------------------------------------------------------------------------------------------------------------------------------------------------------------------------------------------------------------------------------------------------------------------------------------------------------------------------------------------------------------------------------------------------------------------------------------------------------------------------------------------------------------------------------------------------------------------------------------------------------------------------------------------------------------------------------------------------------------------------------------------------------------------------------------------------------------------------------------------------------------------------------------------------------------------|---------------------------------------------------------------------------------------------------------------------------------------------------------------------------------------------------------------------------------------------------------------------------------------------------------------------------------------------------------------------------------------------------------------------------------------------------------------------------------------------------------------------|---|-----------------|---|--------------|---|-------------|---|--------------|---|--------------|---|------------|---|---------------|---|-------------|---|---------------|----|------------|----|---------------|
|      | Instrument: <b>Students Maternal Shock Scenario</b> (students_maternal_shock_scenario) [collapsed]                   |                                                                                                                                                                                                                                                                                                                                                                                                                                                                                                                                                                                                                                                                                                                                                                                                                                                                                                                                                                                                                                                                                                                                                                                                                                                                                                                                                                                                                                                                                                                                                                              |                                                                                                                                                                                                                                                                                                                                                                                                                                                                                                                     |   |                 |   |              |   |             |   |              |   |              |   |            |   |               |   |             |   |               |    |            |    |               |
|      | Instrument: <b>BMGF Nigeria Maternal Mortality Baseline</b> (bmgf_nigeria_maternal_mortality_baseline) [collapsed]   |                                                                                                                                                                                                                                                                                                                                                                                                                                                                                                                                                                                                                                                                                                                                                                                                                                                                                                                                                                                                                                                                                                                                                                                                                                                                                                                                                                                                                                                                                                                                                                              |                                                                                                                                                                                                                                                                                                                                                                                                                                                                                                                     |   |                 |   |              |   |             |   |              |   |              |   |            |   |               |   |             |   |               |    |            |    |               |
|      | Instrument: <b>Data demo</b> (data_demo) [collapsed]                                                                 |                                                                                                                                                                                                                                                                                                                                                                                                                                                                                                                                                                                                                                                                                                                                                                                                                                                                                                                                                                                                                                                                                                                                                                                                                                                                                                                                                                                                                                                                                                                                                                              |                                                                                                                                                                                                                                                                                                                                                                                                                                                                                                                     |   |                 |   |              |   |             |   |              |   |              |   |            |   |               |   |             |   |               |    |            |    |               |
|      | Instrument: <b>Institutional assessment tool_V1</b> (institutional_assessment_tool_v1) [collapsed]                   |                                                                                                                                                                                                                                                                                                                                                                                                                                                                                                                                                                                                                                                                                                                                                                                                                                                                                                                                                                                                                                                                                                                                                                                                                                                                                                                                                                                                                                                                                                                                                                              |                                                                                                                                                                                                                                                                                                                                                                                                                                                                                                                     |   |                 |   |              |   |             |   |              |   |              |   |            |   |               |   |             |   |               |    |            |    |               |
|      | Instrument: <b>Teaching Observation Form_V1</b> (teaching_observation_form_v1) [collapsed]                           |                                                                                                                                                                                                                                                                                                                                                                                                                                                                                                                                                                                                                                                                                                                                                                                                                                                                                                                                                                                                                                                                                                                                                                                                                                                                                                                                                                                                                                                                                                                                                                              |                                                                                                                                                                                                                                                                                                                                                                                                                                                                                                                     |   |                 |   |              |   |             |   |              |   |              |   |            |   |               |   |             |   |               |    |            |    |               |
|      | Instrument: <b>Staff retention initial online survey</b> (staff_retention_initial_online_survey) [collapsed]         |                                                                                                                                                                                                                                                                                                                                                                                                                                                                                                                                                                                                                                                                                                                                                                                                                                                                                                                                                                                                                                                                                                                                                                                                                                                                                                                                                                                                                                                                                                                                                                              |                                                                                                                                                                                                                                                                                                                                                                                                                                                                                                                     |   |                 |   |              |   |             |   |              |   |              |   |            |   |               |   |             |   |               |    |            |    |               |
|      | Instrument: <b>NMCN checklist tool_2025</b> (nmcn_checklist_tool_2025) [collapsed]                                   |                                                                                                                                                                                                                                                                                                                                                                                                                                                                                                                                                                                                                                                                                                                                                                                                                                                                                                                                                                                                                                                                                                                                                                                                                                                                                                                                                                                                                                                                                                                                                                              |                                                                                                                                                                                                                                                                                                                                                                                                                                                                                                                     |   |                 |   |              |   |             |   |              |   |              |   |            |   |               |   |             |   |               |    |            |    |               |
|      | Instrument: <b>OSCE Basic Life Support Of The Newborn V1</b> (osce_basic_life_support_of_the_newborn_v1) [collapsed] |                                                                                                                                                                                                                                                                                                                                                                                                                                                                                                                                                                                                                                                                                                                                                                                                                                                                                                                                                                                                                                                                                                                                                                                                                                                                                                                                                                                                                                                                                                                                                                              |                                                                                                                                                                                                                                                                                                                                                                                                                                                                                                                     |   |                 |   |              |   |             |   |              |   |              |   |            |   |               |   |             |   |               |    |            |    |               |
|      | Instrument: <b>OSCE Management Of PPH_V1</b> (osce_management_of_pph_v1) [collapsed]                                 |                                                                                                                                                                                                                                                                                                                                                                                                                                                                                                                                                                                                                                                                                                                                                                                                                                                                                                                                                                                                                                                                                                                                                                                                                                                                                                                                                                                                                                                                                                                                                                              |                                                                                                                                                                                                                                                                                                                                                                                                                                                                                                                     |   |                 |   |              |   |             |   |              |   |              |   |            |   |               |   |             |   |               |    |            |    |               |
|      | Instrument: <b>OSCE Labour Care Guide (LCG)_V1</b> (osce_labour_care_guide_lcg_v1)                                   |                                                                                                                                                                                                                                                                                                                                                                                                                                                                                                                                                                                                                                                                                                                                                                                                                                                                                                                                                                                                                                                                                                                                                                                                                                                                                                                                                                                                                                                                                                                                                                              |                                                                                                                                                                                                                                                                                                                                                                                                                                                                                                                     |   |                 |   |              |   |             |   |              |   |              |   |            |   |               |   |             |   |               |    |            |    |               |
| 1003 | [ e_a001 ]                                                                                                           | <p>Section Header: <i>Instructions: Complete the provided LCG with the following information. Mrs Jummai Nkechi Oladapo (Mrs JNO) is a 32-year-old G4P2+1 (one alive); she had a stillborn in her first pregnancy. Her gestational age was 38 weeks, and she presented to the labour ward on 15th January 2025 at 06:30 hours accompanied by her husband and sister. She complained of labour pains, which started about 3 hours ago; she had a drainage of liquor, which began 30 minutes ago. 07:00 hours She was examined and her temperature was 36.70C, her PR 85/min, and her BP 110/70mmHg The descent was 3/5 palpable, Contractions were 3 in 10 minutes each lasting 45 seconds Vaginal examination showed cervical dilatation of 5cm, membranes were ruptured the liquor was clear there was no caput no moulding, fetal position was occiput transverse She passed urine Urinalysis showed no protein and no acetone FHR was 136 bpm without deceleration She was admitted to the labour ward; since her condition is stable, the midwife will reassess her in 4 hours. Mrs JNO asked for her sister to be her companion in labour; the midwife gave directions to the sister on how to support Mrs JNO by massaging her back and cleaning her face with a damp towel. She was moving around in the labour ward, and she drank some juice and water. She was offered pain relief with paracetamol injection, but she declined 11:00 hours Her PR was 96/min, BP 120/80mmHg, temperature 36.90 Descent 0/5, contractions 4/10/50 secs Vaginal examination</i></p> | dropdown, Required <table border="1"> <tr><td>1</td><td>Akwa Ibom (AKW)</td></tr> <tr><td>2</td><td>Bauchi (BAU)</td></tr> <tr><td>3</td><td>Borno (BOR)</td></tr> <tr><td>4</td><td>Ebonyi (EBO)</td></tr> <tr><td>5</td><td>Kaduna (KAD)</td></tr> <tr><td>6</td><td>Kano (KAU)</td></tr> <tr><td>7</td><td>Katsina (KAT)</td></tr> <tr><td>8</td><td>Niger (NIG)</td></tr> <tr><td>9</td><td>Plateau (PLT)</td></tr> <tr><td>10</td><td>Yobe (YOB)</td></tr> <tr><td>11</td><td>Zamfara (ZAM)</td></tr> </table> | 1 | Akwa Ibom (AKW) | 2 | Bauchi (BAU) | 3 | Borno (BOR) | 4 | Ebonyi (EBO) | 5 | Kaduna (KAD) | 6 | Kano (KAU) | 7 | Katsina (KAT) | 8 | Niger (NIG) | 9 | Plateau (PLT) | 10 | Yobe (YOB) | 11 | Zamfara (ZAM) |
| 1    | Akwa Ibom (AKW)                                                                                                      |                                                                                                                                                                                                                                                                                                                                                                                                                                                                                                                                                                                                                                                                                                                                                                                                                                                                                                                                                                                                                                                                                                                                                                                                                                                                                                                                                                                                                                                                                                                                                                              |                                                                                                                                                                                                                                                                                                                                                                                                                                                                                                                     |   |                 |   |              |   |             |   |              |   |              |   |            |   |               |   |             |   |               |    |            |    |               |
| 2    | Bauchi (BAU)                                                                                                         |                                                                                                                                                                                                                                                                                                                                                                                                                                                                                                                                                                                                                                                                                                                                                                                                                                                                                                                                                                                                                                                                                                                                                                                                                                                                                                                                                                                                                                                                                                                                                                              |                                                                                                                                                                                                                                                                                                                                                                                                                                                                                                                     |   |                 |   |              |   |             |   |              |   |              |   |            |   |               |   |             |   |               |    |            |    |               |
| 3    | Borno (BOR)                                                                                                          |                                                                                                                                                                                                                                                                                                                                                                                                                                                                                                                                                                                                                                                                                                                                                                                                                                                                                                                                                                                                                                                                                                                                                                                                                                                                                                                                                                                                                                                                                                                                                                              |                                                                                                                                                                                                                                                                                                                                                                                                                                                                                                                     |   |                 |   |              |   |             |   |              |   |              |   |            |   |               |   |             |   |               |    |            |    |               |
| 4    | Ebonyi (EBO)                                                                                                         |                                                                                                                                                                                                                                                                                                                                                                                                                                                                                                                                                                                                                                                                                                                                                                                                                                                                                                                                                                                                                                                                                                                                                                                                                                                                                                                                                                                                                                                                                                                                                                              |                                                                                                                                                                                                                                                                                                                                                                                                                                                                                                                     |   |                 |   |              |   |             |   |              |   |              |   |            |   |               |   |             |   |               |    |            |    |               |
| 5    | Kaduna (KAD)                                                                                                         |                                                                                                                                                                                                                                                                                                                                                                                                                                                                                                                                                                                                                                                                                                                                                                                                                                                                                                                                                                                                                                                                                                                                                                                                                                                                                                                                                                                                                                                                                                                                                                              |                                                                                                                                                                                                                                                                                                                                                                                                                                                                                                                     |   |                 |   |              |   |             |   |              |   |              |   |            |   |               |   |             |   |               |    |            |    |               |
| 6    | Kano (KAU)                                                                                                           |                                                                                                                                                                                                                                                                                                                                                                                                                                                                                                                                                                                                                                                                                                                                                                                                                                                                                                                                                                                                                                                                                                                                                                                                                                                                                                                                                                                                                                                                                                                                                                              |                                                                                                                                                                                                                                                                                                                                                                                                                                                                                                                     |   |                 |   |              |   |             |   |              |   |              |   |            |   |               |   |             |   |               |    |            |    |               |
| 7    | Katsina (KAT)                                                                                                        |                                                                                                                                                                                                                                                                                                                                                                                                                                                                                                                                                                                                                                                                                                                                                                                                                                                                                                                                                                                                                                                                                                                                                                                                                                                                                                                                                                                                                                                                                                                                                                              |                                                                                                                                                                                                                                                                                                                                                                                                                                                                                                                     |   |                 |   |              |   |             |   |              |   |              |   |            |   |               |   |             |   |               |    |            |    |               |
| 8    | Niger (NIG)                                                                                                          |                                                                                                                                                                                                                                                                                                                                                                                                                                                                                                                                                                                                                                                                                                                                                                                                                                                                                                                                                                                                                                                                                                                                                                                                                                                                                                                                                                                                                                                                                                                                                                              |                                                                                                                                                                                                                                                                                                                                                                                                                                                                                                                     |   |                 |   |              |   |             |   |              |   |              |   |            |   |               |   |             |   |               |    |            |    |               |
| 9    | Plateau (PLT)                                                                                                        |                                                                                                                                                                                                                                                                                                                                                                                                                                                                                                                                                                                                                                                                                                                                                                                                                                                                                                                                                                                                                                                                                                                                                                                                                                                                                                                                                                                                                                                                                                                                                                              |                                                                                                                                                                                                                                                                                                                                                                                                                                                                                                                     |   |                 |   |              |   |             |   |              |   |              |   |            |   |               |   |             |   |               |    |            |    |               |
| 10   | Yobe (YOB)                                                                                                           |                                                                                                                                                                                                                                                                                                                                                                                                                                                                                                                                                                                                                                                                                                                                                                                                                                                                                                                                                                                                                                                                                                                                                                                                                                                                                                                                                                                                                                                                                                                                                                              |                                                                                                                                                                                                                                                                                                                                                                                                                                                                                                                     |   |                 |   |              |   |             |   |              |   |              |   |            |   |               |   |             |   |               |    |            |    |               |
| 11   | Zamfara (ZAM)                                                                                                        |                                                                                                                                                                                                                                                                                                                                                                                                                                                                                                                                                                                                                                                                                                                                                                                                                                                                                                                                                                                                                                                                                                                                                                                                                                                                                                                                                                                                                                                                                                                                                                              |                                                                                                                                                                                                                                                                                                                                                                                                                                                                                                                     |   |                 |   |              |   |             |   |              |   |              |   |            |   |               |   |             |   |               |    |            |    |               |

|      |                                                              |                                                                                                                                                                                                                                                                                                                                                                                                                                                                                                                                                                                                                                                                                                        |                                                                                                                                                                                                                                         |   |                                                        |   |                                                              |
|------|--------------------------------------------------------------|--------------------------------------------------------------------------------------------------------------------------------------------------------------------------------------------------------------------------------------------------------------------------------------------------------------------------------------------------------------------------------------------------------------------------------------------------------------------------------------------------------------------------------------------------------------------------------------------------------------------------------------------------------------------------------------------------------|-----------------------------------------------------------------------------------------------------------------------------------------------------------------------------------------------------------------------------------------|---|--------------------------------------------------------|---|--------------------------------------------------------------|
|      |                                                              | <p><i>shows cervix was 9cm dilated, caput+, no moulding+ amniotic fluid was clear, the fetal position was occiput anterior FHR 140 bpm with variable decelerations She was lying supine; her sister supported her with breathing exercises, and she had been drinking water. Urinalysis shows protein+ no acetone 12:15 hours Mrs JNO was delivered vaginally. She was given Oxytocin 10IU after the delivery of the baby, and the placenta was delivered by cord traction. The estimated blood loss was 350mls. The perineum was intact. The Baby was a live male neonate with Apgar scores of 8 and 9 at 1 and 5 minutes, respectively, and a birth weight of 3.4kg.</i></p> <p>1. Name of state</p> |                                                                                                                                                                                                                                         |   |                                                        |   |                                                              |
| 1004 | [e_a001a]<br>Show the field ONLY if:<br>[e_a001] = 1         | 1a. Akwa Ibom state facilities                                                                                                                                                                                                                                                                                                                                                                                                                                                                                                                                                                                                                                                                         | <p>dropdown, Required</p> <table border="1"> <tr> <td>1</td> <td>(1) College of Nursing Sciences, Anua Uyo</td> </tr> </table>                                                                                                          | 1 | (1) College of Nursing Sciences, Anua Uyo              |   |                                                              |
| 1    | (1) College of Nursing Sciences, Anua Uyo                    |                                                                                                                                                                                                                                                                                                                                                                                                                                                                                                                                                                                                                                                                                                        |                                                                                                                                                                                                                                         |   |                                                        |   |                                                              |
| 1005 | [e_a001b]<br>Show the field ONLY if:<br>[e_a001] = 2         | 1b. Bauchi state facilities                                                                                                                                                                                                                                                                                                                                                                                                                                                                                                                                                                                                                                                                            | <p>dropdown, Required</p> <table border="1"> <tr> <td>1</td> <td>(1) ATBUTH College of Nursing Sciences, Bauchi</td> </tr> <tr> <td>2</td> <td>(2) Adamu College of Nursing Sciences, Azare Bauchi</td> </tr> </table>                  | 1 | (1) ATBUTH College of Nursing Sciences, Bauchi         | 2 | (2) Adamu College of Nursing Sciences, Azare Bauchi          |
| 1    | (1) ATBUTH College of Nursing Sciences, Bauchi               |                                                                                                                                                                                                                                                                                                                                                                                                                                                                                                                                                                                                                                                                                                        |                                                                                                                                                                                                                                         |   |                                                        |   |                                                              |
| 2    | (2) Adamu College of Nursing Sciences, Azare Bauchi          |                                                                                                                                                                                                                                                                                                                                                                                                                                                                                                                                                                                                                                                                                                        |                                                                                                                                                                                                                                         |   |                                                        |   |                                                              |
| 1006 | [e_a001c]<br>Show the field ONLY if:<br>[e_a001] = 3         | 1c. Borno state facilities                                                                                                                                                                                                                                                                                                                                                                                                                                                                                                                                                                                                                                                                             | <p>dropdown, Required</p> <table border="1"> <tr> <td>1</td> <td>(1) Borno State College of Nursing Sciences, Maiduguri</td> </tr> <tr> <td>2</td> <td>(2) University of Maiduguri College of Nursing Sciences</td> </tr> </table>      | 1 | (1) Borno State College of Nursing Sciences, Maiduguri | 2 | (2) University of Maiduguri College of Nursing Sciences      |
| 1    | (1) Borno State College of Nursing Sciences, Maiduguri       |                                                                                                                                                                                                                                                                                                                                                                                                                                                                                                                                                                                                                                                                                                        |                                                                                                                                                                                                                                         |   |                                                        |   |                                                              |
| 2    | (2) University of Maiduguri College of Nursing Sciences      |                                                                                                                                                                                                                                                                                                                                                                                                                                                                                                                                                                                                                                                                                                        |                                                                                                                                                                                                                                         |   |                                                        |   |                                                              |
| 1007 | [e_a001d]<br>Show the field ONLY if:<br>[e_a001] = 4         | 1d. Ebonyi state facilities                                                                                                                                                                                                                                                                                                                                                                                                                                                                                                                                                                                                                                                                            | <p>dropdown, Required</p> <table border="1"> <tr> <td>1</td> <td>(1) College of Nursing Sciences, Abakaliki</td> </tr> <tr> <td>2</td> <td>(2) College of Nursing Sciences, Uburu</td> </tr> </table>                                   | 1 | (1) College of Nursing Sciences, Abakaliki             | 2 | (2) College of Nursing Sciences, Uburu                       |
| 1    | (1) College of Nursing Sciences, Abakaliki                   |                                                                                                                                                                                                                                                                                                                                                                                                                                                                                                                                                                                                                                                                                                        |                                                                                                                                                                                                                                         |   |                                                        |   |                                                              |
| 2    | (2) College of Nursing Sciences, Uburu                       |                                                                                                                                                                                                                                                                                                                                                                                                                                                                                                                                                                                                                                                                                                        |                                                                                                                                                                                                                                         |   |                                                        |   |                                                              |
| 1008 | [e_a001e]<br>Show the field ONLY if:<br>[e_a001] = 5         | 1e. Kaduna state facilities                                                                                                                                                                                                                                                                                                                                                                                                                                                                                                                                                                                                                                                                            | <p>dropdown, Required</p> <table border="1"> <tr> <td>1</td> <td>(1) College of Nursing Sciences, Tudun Wada, Kaduna</td> </tr> <tr> <td>2</td> <td>(2) College of Nursing Sciences, ABUTH, Zaria</td> </tr> </table>                   | 1 | (1) College of Nursing Sciences, Tudun Wada, Kaduna    | 2 | (2) College of Nursing Sciences, ABUTH, Zaria                |
| 1    | (1) College of Nursing Sciences, Tudun Wada, Kaduna          |                                                                                                                                                                                                                                                                                                                                                                                                                                                                                                                                                                                                                                                                                                        |                                                                                                                                                                                                                                         |   |                                                        |   |                                                              |
| 2    | (2) College of Nursing Sciences, ABUTH, Zaria                |                                                                                                                                                                                                                                                                                                                                                                                                                                                                                                                                                                                                                                                                                                        |                                                                                                                                                                                                                                         |   |                                                        |   |                                                              |
| 1009 | [e_a001f]<br>Show the field ONLY if:<br>[e_a001] = 6         | 1f. Kano state facilities                                                                                                                                                                                                                                                                                                                                                                                                                                                                                                                                                                                                                                                                              | <p>dropdown, Required</p> <table border="1"> <tr> <td>1</td> <td>(1) College of Nursing Sciences, Kano</td> </tr> <tr> <td>2</td> <td>(2) College of Nursing Sciences, Gwarzo Kano</td> </tr> </table>                                  | 1 | (1) College of Nursing Sciences, Kano                  | 2 | (2) College of Nursing Sciences, Gwarzo Kano                 |
| 1    | (1) College of Nursing Sciences, Kano                        |                                                                                                                                                                                                                                                                                                                                                                                                                                                                                                                                                                                                                                                                                                        |                                                                                                                                                                                                                                         |   |                                                        |   |                                                              |
| 2    | (2) College of Nursing Sciences, Gwarzo Kano                 |                                                                                                                                                                                                                                                                                                                                                                                                                                                                                                                                                                                                                                                                                                        |                                                                                                                                                                                                                                         |   |                                                        |   |                                                              |
| 1010 | [e_a001g]<br>Show the field ONLY if:<br>[e_a001] = 7         | 1g. Katsina state facilities                                                                                                                                                                                                                                                                                                                                                                                                                                                                                                                                                                                                                                                                           | <p>dropdown, Required</p> <table border="1"> <tr> <td>1</td> <td>(1) Katsina State College of Nursing Sciences, Katsina</td> </tr> <tr> <td>2</td> <td>(2) Nana Bojo College of Nursing Sciences, Malumfashi Campus</td> </tr> </table> | 1 | (1) Katsina State College of Nursing Sciences, Katsina | 2 | (2) Nana Bojo College of Nursing Sciences, Malumfashi Campus |
| 1    | (1) Katsina State College of Nursing Sciences, Katsina       |                                                                                                                                                                                                                                                                                                                                                                                                                                                                                                                                                                                                                                                                                                        |                                                                                                                                                                                                                                         |   |                                                        |   |                                                              |
| 2    | (2) Nana Bojo College of Nursing Sciences, Malumfashi Campus |                                                                                                                                                                                                                                                                                                                                                                                                                                                                                                                                                                                                                                                                                                        |                                                                                                                                                                                                                                         |   |                                                        |   |                                                              |

|      |                                                                                                                                                                                                                                                                                                                          |                              |                                                                                                                                |
|------|--------------------------------------------------------------------------------------------------------------------------------------------------------------------------------------------------------------------------------------------------------------------------------------------------------------------------|------------------------------|--------------------------------------------------------------------------------------------------------------------------------|
| 1011 | [e_a001h]<br>Show the field ONLY if:<br>[e_a001] = 8                                                                                                                                                                                                                                                                     | 1h. Niger state facilities   | dropdown, Required<br>1 (1) College of Nursing Sciences, Bida<br>2 (2) College of Nursing Sciences, Kontagora                  |
| 1012 | [e_a001i]<br>Show the field ONLY if:<br>[e_a001] = 9                                                                                                                                                                                                                                                                     | 1i. Plateau state facilities | dropdown, Required<br>1 (1) College of Nursing Sciences, VOM<br>2 (2) College of Nursing Sciences, JUTH, JOS                   |
| 1013 | [e_a001j]<br>Show the field ONLY if:<br>[e_a001] = 10                                                                                                                                                                                                                                                                    | 1j. Yobe state facilities    | dropdown, Required<br>1 (1) Shehu Sule College of Nursing Sciences, Damatutru<br>2 (2) College of Nursing Sciences, FMC, Nguru |
| 1014 | [e_a001k]<br>Show the field ONLY if:<br>[e_a001] = 11                                                                                                                                                                                                                                                                    | 1k. Zamfara state facilities | dropdown, Required<br>1 (1) College of Nursing Sciences, Gusau                                                                 |
| 1015 | [e_a002]<br>2. Who is taking part?                                                                                                                                                                                                                                                                                       |                              | radio, Required<br>1 Midwifery Educator (ME)<br>2 Preceptor (PR)<br>3 Student (ST)                                             |
| 1016 | [e_a003]<br>3. Participant UID<br><i>Example: State-Institution-assessed-no. (AKW-1-ME-01)</i>                                                                                                                                                                                                                           |                              | text, Required                                                                                                                 |
| 1017 | [e_a004]<br>4. Name of assessor                                                                                                                                                                                                                                                                                          |                              | text, Required                                                                                                                 |
| 1018 | [e_a005x]<br>Section Observation Mark Score Section 1 Patient information 2 {e_s1} Section 2 Supportive care 3 {e_s2} Section 3 Baby 3 {e_s3} Section 4 Women 3 {e_s4} Section 5 Labour progress Cervix Descent 2 2 {e_s5} Section 6 Medication 3 {e_s6} Section 7 Shared decision making 2 {e_s7} Total Score 20 {e_s8} |                              | descriptive                                                                                                                    |
| 1019 | [e_s1]<br>5. Patient information                                                                                                                                                                                                                                                                                         |                              | text (integer, Min: 0, Max: 2), Required                                                                                       |
| 1020 | [e_s2]<br>5. Supportive Care                                                                                                                                                                                                                                                                                             |                              | text (integer, Min: 0, Max: 3), Required                                                                                       |
| 1021 | [e_s3]<br>5. Baby                                                                                                                                                                                                                                                                                                        |                              | text (integer, Min: 0, Max: 3), Required                                                                                       |
| 1022 | [e_s4]<br>5. Women                                                                                                                                                                                                                                                                                                       |                              | text (integer, Min: 0, Max: 3), Required                                                                                       |
| 1023 | [e_s5]<br>5. Labour progress                                                                                                                                                                                                                                                                                             |                              | text (integer, Min: 0, Max: 4), Required                                                                                       |
| 1024 | [e_s6]<br>5. Medication                                                                                                                                                                                                                                                                                                  |                              | text (integer, Min: 0, Max: 3), Required                                                                                       |
| 1025 | [e_s7]<br>5. Shared decision making                                                                                                                                                                                                                                                                                      |                              | text (integer, Min: 0, Max: 2), Required                                                                                       |
| 1026 | [e_s8]<br>6. Total Score                                                                                                                                                                                                                                                                                                 |                              | calc, Required<br>Calculation: sum([e_s1], [e_s2], [e_s3], [e_s4], [e_s5], [e_s6], [e_s7])                                     |

|  |      |                                          |                                                 |              |
|--|------|------------------------------------------|-------------------------------------------------|--------------|
|  | 1027 | [osce_labour_care_guide_lcg_v1_complete] | Section Header: <i>Form Status</i><br>Complete? | dropdown     |
|  |      |                                          |                                                 | 0 Incomplete |
|  |      |                                          |                                                 | 1 Unverified |
|  |      |                                          |                                                 | 2 Complete   |

## Data Dictionary Codebook

2025-01-30 2:13pm

| #                                                                                                                  | Variable / Field Name                                    | Field Label<br><i>Field Note</i>                          | Field Attributes (Field Type, Validation, Choices, Calculations, etc.)                                                                                                                                                                                                                                                                                                                                                                                                                               |   |                                                    |   |                                                          |   |       |   |       |   |      |   |      |   |        |   |         |   |        |    |         |    |           |
|--------------------------------------------------------------------------------------------------------------------|----------------------------------------------------------|-----------------------------------------------------------|------------------------------------------------------------------------------------------------------------------------------------------------------------------------------------------------------------------------------------------------------------------------------------------------------------------------------------------------------------------------------------------------------------------------------------------------------------------------------------------------------|---|----------------------------------------------------|---|----------------------------------------------------------|---|-------|---|-------|---|------|---|------|---|--------|---|---------|---|--------|----|---------|----|-----------|
| Instrument: <b>Students Maternal Shock Scenario</b> (students_maternal_shock_scenario) [collapsed]                 |                                                          |                                                           |                                                                                                                                                                                                                                                                                                                                                                                                                                                                                                      |   |                                                    |   |                                                          |   |       |   |       |   |      |   |      |   |        |   |         |   |        |    |         |    |           |
| Instrument: <b>BMGF Nigeria Maternal Mortality Baseline</b> (bmgf_nigeria_maternal_mortality_baseline) [collapsed] |                                                          |                                                           |                                                                                                                                                                                                                                                                                                                                                                                                                                                                                                      |   |                                                    |   |                                                          |   |       |   |       |   |      |   |      |   |        |   |         |   |        |    |         |    |           |
| Instrument: <b>Data demo</b> (data_demo) [collapsed]                                                               |                                                          |                                                           |                                                                                                                                                                                                                                                                                                                                                                                                                                                                                                      |   |                                                    |   |                                                          |   |       |   |       |   |      |   |      |   |        |   |         |   |        |    |         |    |           |
| Instrument: <b>Institutional assessment tool_V4</b> (institutional_assessment_tool_v4)                             |                                                          |                                                           |                                                                                                                                                                                                                                                                                                                                                                                                                                                                                                      |   |                                                    |   |                                                          |   |       |   |       |   |      |   |      |   |        |   |         |   |        |    |         |    |           |
| 740                                                                                                                | [a01]                                                    | Section Header: <i>Section A: Demographics</i><br>1. Date | text (date_dmy), Required                                                                                                                                                                                                                                                                                                                                                                                                                                                                            |   |                                                    |   |                                                          |   |       |   |       |   |      |   |      |   |        |   |         |   |        |    |         |    |           |
| 741                                                                                                                | [a02]                                                    | 2. Name of state                                          | dropdown, Required<br><table border="1" style="width: 100%; border-collapse: collapse;"> <tr><td>1</td><td>Katsina</td></tr> <tr><td>2</td><td>Bauchi</td></tr> <tr><td>3</td><td>Borno</td></tr> <tr><td>4</td><td>Niger</td></tr> <tr><td>5</td><td>Yobe</td></tr> <tr><td>6</td><td>Kano</td></tr> <tr><td>7</td><td>Kaduna</td></tr> <tr><td>8</td><td>Plateau</td></tr> <tr><td>9</td><td>Ebonyi</td></tr> <tr><td>10</td><td>Zamfara</td></tr> <tr><td>11</td><td>Akwa Ibom</td></tr> </table> | 1 | Katsina                                            | 2 | Bauchi                                                   | 3 | Borno | 4 | Niger | 5 | Yobe | 6 | Kano | 7 | Kaduna | 8 | Plateau | 9 | Ebonyi | 10 | Zamfara | 11 | Akwa Ibom |
| 1                                                                                                                  | Katsina                                                  |                                                           |                                                                                                                                                                                                                                                                                                                                                                                                                                                                                                      |   |                                                    |   |                                                          |   |       |   |       |   |      |   |      |   |        |   |         |   |        |    |         |    |           |
| 2                                                                                                                  | Bauchi                                                   |                                                           |                                                                                                                                                                                                                                                                                                                                                                                                                                                                                                      |   |                                                    |   |                                                          |   |       |   |       |   |      |   |      |   |        |   |         |   |        |    |         |    |           |
| 3                                                                                                                  | Borno                                                    |                                                           |                                                                                                                                                                                                                                                                                                                                                                                                                                                                                                      |   |                                                    |   |                                                          |   |       |   |       |   |      |   |      |   |        |   |         |   |        |    |         |    |           |
| 4                                                                                                                  | Niger                                                    |                                                           |                                                                                                                                                                                                                                                                                                                                                                                                                                                                                                      |   |                                                    |   |                                                          |   |       |   |       |   |      |   |      |   |        |   |         |   |        |    |         |    |           |
| 5                                                                                                                  | Yobe                                                     |                                                           |                                                                                                                                                                                                                                                                                                                                                                                                                                                                                                      |   |                                                    |   |                                                          |   |       |   |       |   |      |   |      |   |        |   |         |   |        |    |         |    |           |
| 6                                                                                                                  | Kano                                                     |                                                           |                                                                                                                                                                                                                                                                                                                                                                                                                                                                                                      |   |                                                    |   |                                                          |   |       |   |       |   |      |   |      |   |        |   |         |   |        |    |         |    |           |
| 7                                                                                                                  | Kaduna                                                   |                                                           |                                                                                                                                                                                                                                                                                                                                                                                                                                                                                                      |   |                                                    |   |                                                          |   |       |   |       |   |      |   |      |   |        |   |         |   |        |    |         |    |           |
| 8                                                                                                                  | Plateau                                                  |                                                           |                                                                                                                                                                                                                                                                                                                                                                                                                                                                                                      |   |                                                    |   |                                                          |   |       |   |       |   |      |   |      |   |        |   |         |   |        |    |         |    |           |
| 9                                                                                                                  | Ebonyi                                                   |                                                           |                                                                                                                                                                                                                                                                                                                                                                                                                                                                                                      |   |                                                    |   |                                                          |   |       |   |       |   |      |   |      |   |        |   |         |   |        |    |         |    |           |
| 10                                                                                                                 | Zamfara                                                  |                                                           |                                                                                                                                                                                                                                                                                                                                                                                                                                                                                                      |   |                                                    |   |                                                          |   |       |   |       |   |      |   |      |   |        |   |         |   |        |    |         |    |           |
| 11                                                                                                                 | Akwa Ibom                                                |                                                           |                                                                                                                                                                                                                                                                                                                                                                                                                                                                                                      |   |                                                    |   |                                                          |   |       |   |       |   |      |   |      |   |        |   |         |   |        |    |         |    |           |
| 742                                                                                                                | [a03a]<br>Show the field ONLY if:<br>[a02] = '1'         | 3a. Katsina state facilities                              | radio, Required<br><table border="1" style="width: 100%; border-collapse: collapse;"> <tr><td>1</td><td>Katsina State College of Nursing Sciences, Katsina</td></tr> <tr><td>2</td><td>Nana Bojo College of Nursing Sciences, Malumfashi Campus</td></tr> </table>                                                                                                                                                                                                                                   | 1 | Katsina State College of Nursing Sciences, Katsina | 2 | Nana Bojo College of Nursing Sciences, Malumfashi Campus |   |       |   |       |   |      |   |      |   |        |   |         |   |        |    |         |    |           |
| 1                                                                                                                  | Katsina State College of Nursing Sciences, Katsina       |                                                           |                                                                                                                                                                                                                                                                                                                                                                                                                                                                                                      |   |                                                    |   |                                                          |   |       |   |       |   |      |   |      |   |        |   |         |   |        |    |         |    |           |
| 2                                                                                                                  | Nana Bojo College of Nursing Sciences, Malumfashi Campus |                                                           |                                                                                                                                                                                                                                                                                                                                                                                                                                                                                                      |   |                                                    |   |                                                          |   |       |   |       |   |      |   |      |   |        |   |         |   |        |    |         |    |           |
| 743                                                                                                                | [a03b]<br>Show the field ONLY if:<br>[a02] = '2'         | 3b. Bauchi state facilities                               | radio, Required<br><table border="1" style="width: 100%; border-collapse: collapse;"> <tr><td>1</td><td>ATBUTH College of Nursing Sciences, Bauchi</td></tr> <tr><td>2</td><td>Adamu College of Nursing Sciences, Azare Bauchi</td></tr> </table>                                                                                                                                                                                                                                                    | 1 | ATBUTH College of Nursing Sciences, Bauchi         | 2 | Adamu College of Nursing Sciences, Azare Bauchi          |   |       |   |       |   |      |   |      |   |        |   |         |   |        |    |         |    |           |
| 1                                                                                                                  | ATBUTH College of Nursing Sciences, Bauchi               |                                                           |                                                                                                                                                                                                                                                                                                                                                                                                                                                                                                      |   |                                                    |   |                                                          |   |       |   |       |   |      |   |      |   |        |   |         |   |        |    |         |    |           |
| 2                                                                                                                  | Adamu College of Nursing Sciences, Azare Bauchi          |                                                           |                                                                                                                                                                                                                                                                                                                                                                                                                                                                                                      |   |                                                    |   |                                                          |   |       |   |       |   |      |   |      |   |        |   |         |   |        |    |         |    |           |

|     |                                                     |                                                                                                                                                             |                                                                                                                                  |
|-----|-----------------------------------------------------|-------------------------------------------------------------------------------------------------------------------------------------------------------------|----------------------------------------------------------------------------------------------------------------------------------|
| 744 | [ a03c ]<br>Show the field ONLY if:<br>[a02] = '3'  | 3c. Borno state facilities                                                                                                                                  | radio, Required<br>1 Borno State College of Nursing Sciences, Maiduguri<br>2 University of Maiduguri College of Nursing Sciences |
| 745 | [ a03d ]<br>Show the field ONLY if:<br>[a02] = '4'  | 3d. Niger state facilities                                                                                                                                  | radio, Required<br>1 College of Nursing Sciences, Bida<br>2 College of Nursing Sciences, Kontagora                               |
| 746 | [ a03e ]<br>Show the field ONLY if:<br>[a02] = '5'  | 3e. Yobe state facilities                                                                                                                                   | radio, Required<br>1 Shehu Sule College of Nursing Sciences, Damatutru<br>2 College of Nursing Sciences, FMC, Nguru              |
| 747 | [ a03f ]<br>Show the field ONLY if:<br>[a02] = '6'  | 3f. Kano state facilities                                                                                                                                   | radio, Required<br>1 College of Nursing Sciences, Kano<br>2 College of Nursing Sciences, Gwarzo Kano                             |
| 748 | [ a03g ]<br>Show the field ONLY if:<br>[a02] = '7'  | 3g. Kaduna state facilities                                                                                                                                 | radio, Required<br>1 College of Nursing Sciences, Tudun Wada, Kaduna<br>2 College of Nursing Sciences, ABUTH, Zaria              |
| 749 | [ a03h ]<br>Show the field ONLY if:<br>[a02] = '8'  | 3h. Plateau state facilities                                                                                                                                | radio, Required<br>1 College of Nursing Sciences, JOS<br>2 College of Nursing Sciences, JUTH, JOS                                |
| 750 | [ a03i ]<br>Show the field ONLY if:<br>[a02] = '9'  | 3i. Ebonyi state facilities                                                                                                                                 | radio, Required<br>1 College of Nursing Sciences, Abakaliki<br>2 College of Nursing Sciences, Uburu                              |
| 751 | [ a03j ]<br>Show the field ONLY if:<br>[a02] = '10' | 3j. Zamfara state facilities                                                                                                                                | radio, Required<br>1 College of Nursing Sciences, Gusau                                                                          |
| 752 | [ a03k ]<br>Show the field ONLY if:<br>[a02] = '11' | 3k. Akwa Ibom state facilities                                                                                                                              | radio, Required<br>1 College of Nursing Sciences, Anua Uyo                                                                       |
| 753 | [ b01a ]                                            | Section Header: <i>Section B: Questions for midwifery head of department The following questions are to be answered by the midwifery head of department</i> | radio, Required<br>1 Yes                                                                                                         |

|     |                       |                                                                                                                                                                                                                                                                                                                                            |                                                                                                                                                                         |   |     |     |                       |     |                       |
|-----|-----------------------|--------------------------------------------------------------------------------------------------------------------------------------------------------------------------------------------------------------------------------------------------------------------------------------------------------------------------------------------|-------------------------------------------------------------------------------------------------------------------------------------------------------------------------|---|-----|-----|-----------------------|-----|-----------------------|
|     |                       | 1. Curriculum updated with competency based EmONC /PPH content                                                                                                                                                                                                                                                                             | <table border="1"> <tr> <td>0</td> <td>No</td> </tr> <tr> <td>-99</td> <td>Information not found</td> </tr> </table>                                                    | 0 | No  | -99 | Information not found |     |                       |
| 0   | No                    |                                                                                                                                                                                                                                                                                                                                            |                                                                                                                                                                         |   |     |     |                       |     |                       |
| -99 | Information not found |                                                                                                                                                                                                                                                                                                                                            |                                                                                                                                                                         |   |     |     |                       |     |                       |
| 754 | [ b01b ]              | 2. Institution delivering the updated curriculum/addendum                                                                                                                                                                                                                                                                                  | radio, Required <table border="1"> <tr> <td>1</td> <td>Yes</td> </tr> <tr> <td>0</td> <td>No</td> </tr> <tr> <td>-99</td> <td>Information not found</td> </tr> </table> | 1 | Yes | 0   | No                    | -99 | Information not found |
| 1   | Yes                   |                                                                                                                                                                                                                                                                                                                                            |                                                                                                                                                                         |   |     |     |                       |     |                       |
| 0   | No                    |                                                                                                                                                                                                                                                                                                                                            |                                                                                                                                                                         |   |     |     |                       |     |                       |
| -99 | Information not found |                                                                                                                                                                                                                                                                                                                                            |                                                                                                                                                                         |   |     |     |                       |     |                       |
| 755 | [ b01c ]              | 3. When was the current curriculum being implemented revised/updated?                                                                                                                                                                                                                                                                      | text, Required                                                                                                                                                          |   |     |     |                       |     |                       |
| 756 | [ b01d ]              | 4. Total number of students admitted                                                                                                                                                                                                                                                                                                       | text (number), Required                                                                                                                                                 |   |     |     |                       |     |                       |
| 757 | [ b001_a ]            | 4a. Number of current final year midwifery students                                                                                                                                                                                                                                                                                        | text (integer), Required                                                                                                                                                |   |     |     |                       |     |                       |
| 758 | [ b01dx ]             | 2021/2022 2022/2023 2023/2024 5. Number of student intakes between... {b01e} {b01f} {b01g}                                                                                                                                                                                                                                                 | descriptive                                                                                                                                                             |   |     |     |                       |     |                       |
| 759 | [ b01e ]              | 5. Number of student intakes between, 2021/2022                                                                                                                                                                                                                                                                                            | text (number), Required                                                                                                                                                 |   |     |     |                       |     |                       |
| 760 | [ b01f ]              | 6. Number of student intakes between, 2022/2023                                                                                                                                                                                                                                                                                            | text (number), Required                                                                                                                                                 |   |     |     |                       |     |                       |
| 761 | [ b01g ]              | 6a. Number of student intakes between 2023/2024                                                                                                                                                                                                                                                                                            | text, Required                                                                                                                                                          |   |     |     |                       |     |                       |
| 762 | [ b01 ]               | 6. How many staff are involved in teaching midwifery modules?                                                                                                                                                                                                                                                                              | text (integer), Required                                                                                                                                                |   |     |     |                       |     |                       |
| 763 | [ b02 ]               | 7. How many midwifery educators are: Male {b_male} Female {b_female}                                                                                                                                                                                                                                                                       | descriptive                                                                                                                                                             |   |     |     |                       |     |                       |
| 764 | [ b_male ]            | 8. How many midwifery educators are male?                                                                                                                                                                                                                                                                                                  | text, Required                                                                                                                                                          |   |     |     |                       |     |                       |
| 765 | [ b_female ]          | 8b. How many midwifery educators are female?                                                                                                                                                                                                                                                                                               | text, Required                                                                                                                                                          |   |     |     |                       |     |                       |
| 766 | [ b03 ]               | 9. In the last 5 years, what training have these members of staff received?<br><i>Please give details - who, when, where, what, by whom</i>                                                                                                                                                                                                | notes, Required                                                                                                                                                         |   |     |     |                       |     |                       |
| 767 | [ b04x ]              | 10. Number of midwifery educators<br>When was the training undertaken (month and year) Where training took place What type of training Who carried out the training {b04a} {b04b} {b04c} {b04d} {b04e} {b04a_2} {b04b_2} {b04c_2} {b04d_2} {b04e_2} {b04a_3} {b04b_3} {b04c_3} {b04d_3} {b04e_3}<br><i>List cadre and type of training</i> | descriptive, Required                                                                                                                                                   |   |     |     |                       |     |                       |
| 768 | [ b04a ]              | 4a. Number of midwifery educators (1)                                                                                                                                                                                                                                                                                                      | text (integer), Required                                                                                                                                                |   |     |     |                       |     |                       |
| 769 | [ b04a_2 ]            | 4a. Number of midwifery educators (2)                                                                                                                                                                                                                                                                                                      | text (integer), Required                                                                                                                                                |   |     |     |                       |     |                       |
| 770 | [ b04a_3 ]            | 4a. Number of midwifery educators (3)                                                                                                                                                                                                                                                                                                      | text (integer), Required                                                                                                                                                |   |     |     |                       |     |                       |
| 771 | [ b04b ]              | 4b. When was the training undertaken (month and year) (1)                                                                                                                                                                                                                                                                                  | text (integer), Required                                                                                                                                                |   |     |     |                       |     |                       |

|     |              |                                                                                                                                    |                          |
|-----|--------------|------------------------------------------------------------------------------------------------------------------------------------|--------------------------|
| 772 | [ b04b_2 ]   | 4b. When was the training undertaken (month and year) (2)                                                                          | text (integer), Required |
| 773 | [ b04b_3 ]   | 4b. When was the training undertaken (month and year) (3)                                                                          | text (integer), Required |
| 774 | [ b04c ]     | 4. Where training took place (1)                                                                                                   | text, Required           |
| 775 | [ b04c_2 ]   | 4. Where training took place (2)                                                                                                   | text, Required           |
| 776 | [ b04c_3 ]   | 4. Where training took place (3)                                                                                                   | text, Required           |
| 777 | [ b04d ]     | 4d. What type of training (1)                                                                                                      | text, Required           |
| 778 | [ b04d_2 ]   | 4d. What type of training (2)                                                                                                      | text, Required           |
| 779 | [ b04d_3 ]   | 4d. What type of training (3)                                                                                                      | text, Required           |
| 780 | [ b04e ]     | 4e. Who carried out the training (1)                                                                                               | text, Required           |
| 781 | [ b04e_2 ]   | 4e. Who carried out the training (2)                                                                                               | text, Required           |
| 782 | [ b04e_3 ]   | 4e. Who carried out the training (3)                                                                                               | text, Required           |
| 783 | [ b05 ]      | 11. Number of midwifery educators with additional teaching qualifications                                                          | text, Required           |
| 784 | [ b06y ]     | 13. Number of midwifery educators with a nursing/midwifery degree                                                                  | text (integer), Required |
| 785 | [ b06 ]      | 14. Number of midwifery educators with Masters degree in nursing/midwifery                                                         | text (integer), Required |
| 786 | [ b07x ]     | 15. Number of midwifery staff who have left this institution in... Total 1 - 2 years {b07b} 3 - 5 years {b07c} 6 - 10 years {b07d} | descriptive              |
| 787 | [ b07b ]     | 15b. Number of midwifery staff who have left this institution in 1 - 2 years                                                       | text (integer), Required |
| 788 | [ b07c ]     | 15c. Number of midwifery staff who have left this institution in 3 - 5 years                                                       | text (integer), Required |
| 789 | [ b07d ]     | 15d. Number of midwifery staff who have left this institution in 6 - 10 years                                                      | text (integer), Required |
| 790 | [ b10 ]      | 16. What is the student to staff ratio? Student {b10a} Midwifery educator {b10b}<br><i>Format: Student:Staff</i>                   | descriptive, Required    |
| 791 | [ b10a ]     | 17a. Student number                                                                                                                | text (integer), Required |
| 792 | [ b10b ]     | 17b. Midwifery educator                                                                                                            | text (integer), Required |
| 793 | [ b_stable ] | 16. Total hours allocated to the programme for... Skill based practice {b_sb} Theory {b_theory}                                    | descriptive              |
| 794 | [ b_sb ]     | 19. Total hours allocated to the programme for... skills based                                                                     | text, Required           |
| 795 | [ b_theory ] | 19. Total hours allocated to the programme for... theory based                                                                     | text, Required           |

|     |                                                   |                                                                                                                                                                        |                                                                                                                                                                                                                                                                                                                       |   |              |                                            |               |        |                                         |   |                         |                                     |
|-----|---------------------------------------------------|------------------------------------------------------------------------------------------------------------------------------------------------------------------------|-----------------------------------------------------------------------------------------------------------------------------------------------------------------------------------------------------------------------------------------------------------------------------------------------------------------------|---|--------------|--------------------------------------------|---------------|--------|-----------------------------------------|---|-------------------------|-------------------------------------|
| 796 | [b13a]                                            | 17. Do members of staff carry out clinical supervision with students when they are out on clinical placement?                                                          | yesno, Required<br><table border="1"> <tr> <td>1</td> <td>Yes</td> </tr> <tr> <td>0</td> <td>No</td> </tr> </table>                                                                                                                                                                                                   | 1 | Yes          | 0                                          | No            |        |                                         |   |                         |                                     |
| 1   | Yes                                               |                                                                                                                                                                        |                                                                                                                                                                                                                                                                                                                       |   |              |                                            |               |        |                                         |   |                         |                                     |
| 0   | No                                                |                                                                                                                                                                        |                                                                                                                                                                                                                                                                                                                       |   |              |                                            |               |        |                                         |   |                         |                                     |
| 797 | [b13b]<br>Show the field ONLY if:<br>[b13a] = '1' | 17a. If so, how often?                                                                                                                                                 | radio, Required<br><table border="1"> <tr> <td>1</td> <td>Every 1 week</td> </tr> <tr> <td>2</td> <td>Every 2 weeks</td> </tr> <tr> <td>3</td> <td>Every 4 weeks</td> </tr> <tr> <td>4</td> <td>After more than 4 weeks</td> </tr> </table>                                                                           | 1 | Every 1 week | 2                                          | Every 2 weeks | 3      | Every 4 weeks                           | 4 | After more than 4 weeks |                                     |
| 1   | Every 1 week                                      |                                                                                                                                                                        |                                                                                                                                                                                                                                                                                                                       |   |              |                                            |               |        |                                         |   |                         |                                     |
| 2   | Every 2 weeks                                     |                                                                                                                                                                        |                                                                                                                                                                                                                                                                                                                       |   |              |                                            |               |        |                                         |   |                         |                                     |
| 3   | Every 4 weeks                                     |                                                                                                                                                                        |                                                                                                                                                                                                                                                                                                                       |   |              |                                            |               |        |                                         |   |                         |                                     |
| 4   | After more than 4 weeks                           |                                                                                                                                                                        |                                                                                                                                                                                                                                                                                                                       |   |              |                                            |               |        |                                         |   |                         |                                     |
| 798 | [b14b]<br>Show the field ONLY if:<br>[b13a] = '0' | 17b. If not, why not?                                                                                                                                                  | text, Required                                                                                                                                                                                                                                                                                                        |   |              |                                            |               |        |                                         |   |                         |                                     |
| 799 | [b15a]                                            | 18. Number of clinical instructors at the institution                                                                                                                  | notes, Required                                                                                                                                                                                                                                                                                                       |   |              |                                            |               |        |                                         |   |                         |                                     |
| 800 | [b15_b]                                           | 19. Number of preceptors in the supported training institution                                                                                                         | text (integer), Required                                                                                                                                                                                                                                                                                              |   |              |                                            |               |        |                                         |   |                         |                                     |
| 801 | [b015a]                                           | 20. Is there a relevant clinical supervision checklist with specific tasks for educators that is completed/confirmed by the students at each visit for accountability? | yesno, Required<br><table border="1"> <tr> <td>1</td> <td>Yes</td> </tr> <tr> <td>0</td> <td>No</td> </tr> </table><br>Custom alignment: RH                                                                                                                                                                           | 1 | Yes          | 0                                          | No            |        |                                         |   |                         |                                     |
| 1   | Yes                                               |                                                                                                                                                                        |                                                                                                                                                                                                                                                                                                                       |   |              |                                            |               |        |                                         |   |                         |                                     |
| 0   | No                                                |                                                                                                                                                                        |                                                                                                                                                                                                                                                                                                                       |   |              |                                            |               |        |                                         |   |                         |                                     |
| 802 | [b15b]                                            | 21. Are there dedicated staff employed by the institution who are trained and responsible for equipment maintenance and skills lab?                                    | yesno, Required<br><table border="1"> <tr> <td>1</td> <td>Yes</td> </tr> <tr> <td>0</td> <td>No</td> </tr> </table><br>Custom alignment: RH                                                                                                                                                                           | 1 | Yes          | 0                                          | No            |        |                                         |   |                         |                                     |
| 1   | Yes                                               |                                                                                                                                                                        |                                                                                                                                                                                                                                                                                                                       |   |              |                                            |               |        |                                         |   |                         |                                     |
| 0   | No                                                |                                                                                                                                                                        |                                                                                                                                                                                                                                                                                                                       |   |              |                                            |               |        |                                         |   |                         |                                     |
| 803 | [b15c]                                            | 22. Are educators familiar with, and know how to use equipment for demonstration/simulation teaching?                                                                  | yesno, Required<br><table border="1"> <tr> <td>1</td> <td>Yes</td> </tr> <tr> <td>0</td> <td>No</td> </tr> </table><br>Custom alignment: RH                                                                                                                                                                           | 1 | Yes          | 0                                          | No            |        |                                         |   |                         |                                     |
| 1   | Yes                                               |                                                                                                                                                                        |                                                                                                                                                                                                                                                                                                                       |   |              |                                            |               |        |                                         |   |                         |                                     |
| 0   | No                                                |                                                                                                                                                                        |                                                                                                                                                                                                                                                                                                                       |   |              |                                            |               |        |                                         |   |                         |                                     |
| 804 | [b12]                                             | Section Header: <i>Section C: Teaching specifics</i><br>1. What type of midwifery program is offered?<br><i>Select all that apply</i>                                  | checkbox, Required<br><table border="1"> <tr> <td>1</td> <td>b12__1</td> <td>18 months (Post basic midwifery programme)</td> </tr> <tr> <td>2</td> <td>b12__2</td> <td>2 years (Community midwifery programme)</td> </tr> <tr> <td>3</td> <td>b12__3</td> <td>3 years (Basic midwifery programme)</td> </tr> </table> | 1 | b12__1       | 18 months (Post basic midwifery programme) | 2             | b12__2 | 2 years (Community midwifery programme) | 3 | b12__3                  | 3 years (Basic midwifery programme) |
| 1   | b12__1                                            | 18 months (Post basic midwifery programme)                                                                                                                             |                                                                                                                                                                                                                                                                                                                       |   |              |                                            |               |        |                                         |   |                         |                                     |
| 2   | b12__2                                            | 2 years (Community midwifery programme)                                                                                                                                |                                                                                                                                                                                                                                                                                                                       |   |              |                                            |               |        |                                         |   |                         |                                     |
| 3   | b12__3                                            | 3 years (Basic midwifery programme)                                                                                                                                    |                                                                                                                                                                                                                                                                                                                       |   |              |                                            |               |        |                                         |   |                         |                                     |
| 805 | [b12b]                                            | 2. Are any digital learning resources/platform are used for teaching the midwifery curriculum?                                                                         | yesno, Required<br><table border="1"> <tr> <td>1</td> <td>Yes</td> </tr> <tr> <td>0</td> <td>No</td> </tr> </table>                                                                                                                                                                                                   | 1 | Yes          | 0                                          | No            |        |                                         |   |                         |                                     |
| 1   | Yes                                               |                                                                                                                                                                        |                                                                                                                                                                                                                                                                                                                       |   |              |                                            |               |        |                                         |   |                         |                                     |
| 0   | No                                                |                                                                                                                                                                        |                                                                                                                                                                                                                                                                                                                       |   |              |                                            |               |        |                                         |   |                         |                                     |
| 806 | [b12c]                                            | 2a. List resources/platforms                                                                                                                                           | notes, Required                                                                                                                                                                                                                                                                                                       |   |              |                                            |               |        |                                         |   |                         |                                     |

|     |                |                                                                  |                                                                                                                                                                                                  |                                                                                                                                                                                                                                                                                                                                                                                                                                              |   |        |                                            |    |        |                                                  |   |        |                                                                  |   |        |                                   |
|-----|----------------|------------------------------------------------------------------|--------------------------------------------------------------------------------------------------------------------------------------------------------------------------------------------------|----------------------------------------------------------------------------------------------------------------------------------------------------------------------------------------------------------------------------------------------------------------------------------------------------------------------------------------------------------------------------------------------------------------------------------------------|---|--------|--------------------------------------------|----|--------|--------------------------------------------------|---|--------|------------------------------------------------------------------|---|--------|-----------------------------------|
|     |                | Show the field ONLY if: [b12b] = '1'                             |                                                                                                                                                                                                  |                                                                                                                                                                                                                                                                                                                                                                                                                                              |   |        |                                            |    |        |                                                  |   |        |                                                                  |   |        |                                   |
| 807 | [b16]          |                                                                  | 3. Number of preceptors trained on updated 2025 curriculum/addendum                                                                                                                              | text (integer), Required                                                                                                                                                                                                                                                                                                                                                                                                                     |   |        |                                            |    |        |                                                  |   |        |                                                                  |   |        |                                   |
| 808 | [b17]          |                                                                  | 4. The school/library has internet access needed for students to access digital/online resources (e.g. Moodle, educational videos, podcasts etc).                                                | yesno, Required<br><table border="1"> <tr> <td>1</td> <td>Yes</td> </tr> <tr> <td>0</td> <td>No</td> </tr> </table>                                                                                                                                                                                                                                                                                                                          | 1 | Yes    | 0                                          | No |        |                                                  |   |        |                                                                  |   |        |                                   |
| 1   | Yes            |                                                                  |                                                                                                                                                                                                  |                                                                                                                                                                                                                                                                                                                                                                                                                                              |   |        |                                            |    |        |                                                  |   |        |                                                                  |   |        |                                   |
| 0   | No             |                                                                  |                                                                                                                                                                                                  |                                                                                                                                                                                                                                                                                                                                                                                                                                              |   |        |                                            |    |        |                                                  |   |        |                                                                  |   |        |                                   |
| 809 | [b18]          |                                                                  | 5. The school has a library/computer lab with functional computers for students to access digital/online resources.                                                                              | yesno, Required<br><table border="1"> <tr> <td>1</td> <td>Yes</td> </tr> <tr> <td>0</td> <td>No</td> </tr> </table>                                                                                                                                                                                                                                                                                                                          | 1 | Yes    | 0                                          | No |        |                                                  |   |        |                                                                  |   |        |                                   |
| 1   | Yes            |                                                                  |                                                                                                                                                                                                  |                                                                                                                                                                                                                                                                                                                                                                                                                                              |   |        |                                            |    |        |                                                  |   |        |                                                                  |   |        |                                   |
| 0   | No             |                                                                  |                                                                                                                                                                                                  |                                                                                                                                                                                                                                                                                                                                                                                                                                              |   |        |                                            |    |        |                                                  |   |        |                                                                  |   |        |                                   |
| 810 | [b13]          |                                                                  | Section Header: <i>Section D: Clinical placements</i><br>1. How are students prepared for clinical placements (Orientation, specific mentor or tutor allocated)?<br><i>Select all that apply</i> | checkbox, Required<br><table border="1"> <tr> <td>1</td> <td>b13__1</td> <td>Orientation done to the classroom and ward</td> </tr> <tr> <td>2</td> <td>b13__2</td> <td>Specific mentor or clinical instructor allocated</td> </tr> <tr> <td>3</td> <td>b13__3</td> <td>specific mentor/clinical instructor and tutor/lecturer allocated</td> </tr> <tr> <td>4</td> <td>b13__4</td> <td>Specific tutor/lecturer allocated</td> </tr> </table> | 1 | b13__1 | Orientation done to the classroom and ward | 2  | b13__2 | Specific mentor or clinical instructor allocated | 3 | b13__3 | specific mentor/clinical instructor and tutor/lecturer allocated | 4 | b13__4 | Specific tutor/lecturer allocated |
| 1   | b13__1         | Orientation done to the classroom and ward                       |                                                                                                                                                                                                  |                                                                                                                                                                                                                                                                                                                                                                                                                                              |   |        |                                            |    |        |                                                  |   |        |                                                                  |   |        |                                   |
| 2   | b13__2         | Specific mentor or clinical instructor allocated                 |                                                                                                                                                                                                  |                                                                                                                                                                                                                                                                                                                                                                                                                                              |   |        |                                            |    |        |                                                  |   |        |                                                                  |   |        |                                   |
| 3   | b13__3         | specific mentor/clinical instructor and tutor/lecturer allocated |                                                                                                                                                                                                  |                                                                                                                                                                                                                                                                                                                                                                                                                                              |   |        |                                            |    |        |                                                  |   |        |                                                                  |   |        |                                   |
| 4   | b13__4         | Specific tutor/lecturer allocated                                |                                                                                                                                                                                                  |                                                                                                                                                                                                                                                                                                                                                                                                                                              |   |        |                                            |    |        |                                                  |   |        |                                                                  |   |        |                                   |
| 811 | [b14]          |                                                                  | Section Header: <i>Section E: Questions for preceptors</i><br>1. How long do midwifery students spend per semester in the clinical site?<br><i>State in weeks</i>                                | text (number), Required                                                                                                                                                                                                                                                                                                                                                                                                                      |   |        |                                            |    |        |                                                  |   |        |                                                                  |   |        |                                   |
| 812 | [c01]          |                                                                  | Section Header: <i>Section F: Training institution skills lab infrastructure Skills lab infrastructure</i><br>1. Skills lab or room for conducting practical training sessions available         | radio, Required<br><table border="1"> <tr> <td>1</td> <td>Yes</td> </tr> <tr> <td>0</td> <td>No</td> </tr> <tr> <td>-88</td> <td>Not applicable</td> </tr> </table>                                                                                                                                                                                                                                                                          | 1 | Yes    | 0                                          | No | -88    | Not applicable                                   |   |        |                                                                  |   |        |                                   |
| 1   | Yes            |                                                                  |                                                                                                                                                                                                  |                                                                                                                                                                                                                                                                                                                                                                                                                                              |   |        |                                            |    |        |                                                  |   |        |                                                                  |   |        |                                   |
| 0   | No             |                                                                  |                                                                                                                                                                                                  |                                                                                                                                                                                                                                                                                                                                                                                                                                              |   |        |                                            |    |        |                                                  |   |        |                                                                  |   |        |                                   |
| -88 | Not applicable |                                                                  |                                                                                                                                                                                                  |                                                                                                                                                                                                                                                                                                                                                                                                                                              |   |        |                                            |    |        |                                                  |   |        |                                                                  |   |        |                                   |
| 813 | [c01a]         | Show the field ONLY if: [c01] = 1                                | 1a. Is the skills lab an upgraded skills lab?                                                                                                                                                    | yesno, Required<br><table border="1"> <tr> <td>1</td> <td>Yes</td> </tr> <tr> <td>0</td> <td>No</td> </tr> </table><br>Custom alignment: RH                                                                                                                                                                                                                                                                                                  | 1 | Yes    | 0                                          | No |        |                                                  |   |        |                                                                  |   |        |                                   |
| 1   | Yes            |                                                                  |                                                                                                                                                                                                  |                                                                                                                                                                                                                                                                                                                                                                                                                                              |   |        |                                            |    |        |                                                  |   |        |                                                                  |   |        |                                   |
| 0   | No             |                                                                  |                                                                                                                                                                                                  |                                                                                                                                                                                                                                                                                                                                                                                                                                              |   |        |                                            |    |        |                                                  |   |        |                                                                  |   |        |                                   |
| 814 | [c02a]         | Show the field ONLY if: [c01] = 1                                | 2. Number of windows                                                                                                                                                                             | text, Required                                                                                                                                                                                                                                                                                                                                                                                                                               |   |        |                                            |    |        |                                                  |   |        |                                                                  |   |        |                                   |
| 815 | [c02b]         | Show the field ONLY if: [c01] = 1                                | 2b. Can the windows be locked?                                                                                                                                                                   | yesno, Required<br><table border="1"> <tr> <td>1</td> <td>Yes</td> </tr> <tr> <td>0</td> <td>No</td> </tr> </table>                                                                                                                                                                                                                                                                                                                          | 1 | Yes    | 0                                          | No |        |                                                  |   |        |                                                                  |   |        |                                   |
| 1   | Yes            |                                                                  |                                                                                                                                                                                                  |                                                                                                                                                                                                                                                                                                                                                                                                                                              |   |        |                                            |    |        |                                                  |   |        |                                                                  |   |        |                                   |
| 0   | No             |                                                                  |                                                                                                                                                                                                  |                                                                                                                                                                                                                                                                                                                                                                                                                                              |   |        |                                            |    |        |                                                  |   |        |                                                                  |   |        |                                   |

|     |                                               |                                                                            |                                                                                                                                                                                                                                                                                                 |                      |     |   |    |     |                |  |
|-----|-----------------------------------------------|----------------------------------------------------------------------------|-------------------------------------------------------------------------------------------------------------------------------------------------------------------------------------------------------------------------------------------------------------------------------------------------|----------------------|-----|---|----|-----|----------------|--|
|     |                                               |                                                                            |                                                                                                                                                                                                                                                                                                 | Custom alignment: RH |     |   |    |     |                |  |
| 816 | [ c02c ]<br>Show the field ONLY if: [c01] = 1 | 2c. Record dimensions for each window                                      | text, Required<br>Custom alignment: RH                                                                                                                                                                                                                                                          |                      |     |   |    |     |                |  |
| 817 | [ c02d ]<br>Show the field ONLY if: [c01] = 1 | 2d. Upload pictures of each window (where applicable)                      | file, Required<br>Custom alignment: RH                                                                                                                                                                                                                                                          |                      |     |   |    |     |                |  |
| 818 | [ c03 ]<br>Show the field ONLY if: [c01] = 1  | 3. Number of doors                                                         | text, Required                                                                                                                                                                                                                                                                                  |                      |     |   |    |     |                |  |
| 819 | [ c03b ]<br>Show the field ONLY if: [c01] = 1 | 3b. Can the doors be locked?                                               | yesno, Required<br><table border="1" style="margin-left: 20px;"> <tr> <td style="width: 20px; text-align: center;">1</td> <td>Yes</td> </tr> <tr> <td style="text-align: center;">0</td> <td>No</td> </tr> </table><br>Custom alignment: RH                                                     | 1                    | Yes | 0 | No |     |                |  |
| 1   | Yes                                           |                                                                            |                                                                                                                                                                                                                                                                                                 |                      |     |   |    |     |                |  |
| 0   | No                                            |                                                                            |                                                                                                                                                                                                                                                                                                 |                      |     |   |    |     |                |  |
| 820 | [ c03c ]<br>Show the field ONLY if: [c01] = 1 | 3c. Record dimensions for doors                                            | text, Required<br>Custom alignment: RH                                                                                                                                                                                                                                                          |                      |     |   |    |     |                |  |
| 821 | [ c03d ]<br>Show the field ONLY if: [c01] = 1 | 3d. Upload pictures of each door (where applicable)                        | file, Required<br>Custom alignment: RH                                                                                                                                                                                                                                                          |                      |     |   |    |     |                |  |
| 822 | [ c04a ]<br>Show the field ONLY if: [c01] = 1 | 4. Describe the type or condition of floor space                           | notes, Required<br>Custom alignment: RH                                                                                                                                                                                                                                                         |                      |     |   |    |     |                |  |
| 823 | [ c04b ]<br>Show the field ONLY if: [c01] = 1 | 4b. Record dimensions of floor space                                       | text, Required<br>Custom alignment: RH                                                                                                                                                                                                                                                          |                      |     |   |    |     |                |  |
| 824 | [ c04c ]<br>Show the field ONLY if: [c01] = 1 | 4c. Upload pictures of floor space                                         | file, Required<br>Custom alignment: RH                                                                                                                                                                                                                                                          |                      |     |   |    |     |                |  |
| 825 | [ c04 ]<br>Show the field ONLY if: [c01] = 1  | 5. Can students access it at other times on their own for skills practice? | radio, Required<br><table border="1" style="margin-left: 20px;"> <tr> <td style="width: 20px; text-align: center;">1</td> <td>Yes</td> </tr> <tr> <td style="text-align: center;">0</td> <td>No</td> </tr> <tr> <td style="text-align: center;">-88</td> <td>Not applicable</td> </tr> </table> | 1                    | Yes | 0 | No | -88 | Not applicable |  |
| 1   | Yes                                           |                                                                            |                                                                                                                                                                                                                                                                                                 |                      |     |   |    |     |                |  |
| 0   | No                                            |                                                                            |                                                                                                                                                                                                                                                                                                 |                      |     |   |    |     |                |  |
| -88 | Not applicable                                |                                                                            |                                                                                                                                                                                                                                                                                                 |                      |     |   |    |     |                |  |
| 826 | [ c05 ]                                       | 6. Is there a full set of equipment in the skills lab?                     | yesno, Required<br><table border="1" style="margin-left: 20px;"> <tr> <td style="width: 20px; text-align: center;">1</td> <td>Yes</td> </tr> </table>                                                                                                                                           | 1                    | Yes |   |    |     |                |  |
| 1   | Yes                                           |                                                                            |                                                                                                                                                                                                                                                                                                 |                      |     |   |    |     |                |  |

|     |                |                                   |                                                                                                                                                                                                                                                                                                                                                                                                                                                                                                                                                                                                                                                                                            |                                                                                                                                                                     |   |     |   |    |     |                |
|-----|----------------|-----------------------------------|--------------------------------------------------------------------------------------------------------------------------------------------------------------------------------------------------------------------------------------------------------------------------------------------------------------------------------------------------------------------------------------------------------------------------------------------------------------------------------------------------------------------------------------------------------------------------------------------------------------------------------------------------------------------------------------------|---------------------------------------------------------------------------------------------------------------------------------------------------------------------|---|-----|---|----|-----|----------------|
|     |                | Show the field ONLY if: [c01] = 1 |                                                                                                                                                                                                                                                                                                                                                                                                                                                                                                                                                                                                                                                                                            | <table border="1"> <tr> <td>0</td> <td>No</td> </tr> </table>                                                                                                       | 0 | No  |   |    |     |                |
| 0   | No             |                                   |                                                                                                                                                                                                                                                                                                                                                                                                                                                                                                                                                                                                                                                                                            |                                                                                                                                                                     |   |     |   |    |     |                |
| 827 | [c05x]         | Show the field ONLY if: [c01] = 1 | Equipment Available In good working order Able to be connected to a power source MamaBirthie {b05d} {b05_d} {b05da} MamaBirthie CS {b05e} {b05_e} {b05ea} MamaNatalie {b05f} {b05_f} {b05fa} NeoNatalie Complete {b05g} {b05_g} {b05ga} Neonatalie Live (NNL) {b05h} {b05_h} {b05ha} Pre-emienatalie with Mama Breast {b05i} {b05_i} {b05ia} Mama-U {b05j} {b05_j} {b05ja} Sister-U {b05k} {b05_k} {b05ka} Episiotomy trainer {b05l} {b05_l} {b05la} Labia repair model (Pack of 6) {b05m} {b05_m} {b05ma} Female catheterisation {b05n} {b05_n} {b05na} Adult IV Arm {b05o} {b05_o} {b05oa} IM Injection trainer {b05p} {b05_p} {b05pa} Little Anne Combo (6-pack) {b05q} {b05_q} {b05qa} | descriptive, Required                                                                                                                                               |   |     |   |    |     |                |
| 828 | [b05d]         |                                   | 5d. MamaBirthie available                                                                                                                                                                                                                                                                                                                                                                                                                                                                                                                                                                                                                                                                  | yesno, Required<br><table border="1"> <tr> <td>1</td> <td>Yes</td> </tr> <tr> <td>0</td> <td>No</td> </tr> </table>                                                 | 1 | Yes | 0 | No |     |                |
| 1   | Yes            |                                   |                                                                                                                                                                                                                                                                                                                                                                                                                                                                                                                                                                                                                                                                                            |                                                                                                                                                                     |   |     |   |    |     |                |
| 0   | No             |                                   |                                                                                                                                                                                                                                                                                                                                                                                                                                                                                                                                                                                                                                                                                            |                                                                                                                                                                     |   |     |   |    |     |                |
| 829 | [b05_d]        |                                   | 5d. MamaBirthie in good working order                                                                                                                                                                                                                                                                                                                                                                                                                                                                                                                                                                                                                                                      | yesno, Required<br><table border="1"> <tr> <td>1</td> <td>Yes</td> </tr> <tr> <td>0</td> <td>No</td> </tr> </table>                                                 | 1 | Yes | 0 | No |     |                |
| 1   | Yes            |                                   |                                                                                                                                                                                                                                                                                                                                                                                                                                                                                                                                                                                                                                                                                            |                                                                                                                                                                     |   |     |   |    |     |                |
| 0   | No             |                                   |                                                                                                                                                                                                                                                                                                                                                                                                                                                                                                                                                                                                                                                                                            |                                                                                                                                                                     |   |     |   |    |     |                |
| 830 | [b05da]        |                                   | 5d. MamaBirthie available power                                                                                                                                                                                                                                                                                                                                                                                                                                                                                                                                                                                                                                                            | radio, Required<br><table border="1"> <tr> <td>1</td> <td>Yes</td> </tr> <tr> <td>0</td> <td>No</td> </tr> <tr> <td>-88</td> <td>Not applicable</td> </tr> </table> | 1 | Yes | 0 | No | -88 | Not applicable |
| 1   | Yes            |                                   |                                                                                                                                                                                                                                                                                                                                                                                                                                                                                                                                                                                                                                                                                            |                                                                                                                                                                     |   |     |   |    |     |                |
| 0   | No             |                                   |                                                                                                                                                                                                                                                                                                                                                                                                                                                                                                                                                                                                                                                                                            |                                                                                                                                                                     |   |     |   |    |     |                |
| -88 | Not applicable |                                   |                                                                                                                                                                                                                                                                                                                                                                                                                                                                                                                                                                                                                                                                                            |                                                                                                                                                                     |   |     |   |    |     |                |
| 831 | [b05e]         |                                   | 5e. MamaBirthie CS available                                                                                                                                                                                                                                                                                                                                                                                                                                                                                                                                                                                                                                                               | yesno, Required<br><table border="1"> <tr> <td>1</td> <td>Yes</td> </tr> <tr> <td>0</td> <td>No</td> </tr> </table>                                                 | 1 | Yes | 0 | No |     |                |
| 1   | Yes            |                                   |                                                                                                                                                                                                                                                                                                                                                                                                                                                                                                                                                                                                                                                                                            |                                                                                                                                                                     |   |     |   |    |     |                |
| 0   | No             |                                   |                                                                                                                                                                                                                                                                                                                                                                                                                                                                                                                                                                                                                                                                                            |                                                                                                                                                                     |   |     |   |    |     |                |
| 832 | [b05_e]        |                                   | 5e. MamaBirthie CS in good working order                                                                                                                                                                                                                                                                                                                                                                                                                                                                                                                                                                                                                                                   | yesno, Required<br><table border="1"> <tr> <td>1</td> <td>Yes</td> </tr> <tr> <td>0</td> <td>No</td> </tr> </table>                                                 | 1 | Yes | 0 | No |     |                |
| 1   | Yes            |                                   |                                                                                                                                                                                                                                                                                                                                                                                                                                                                                                                                                                                                                                                                                            |                                                                                                                                                                     |   |     |   |    |     |                |
| 0   | No             |                                   |                                                                                                                                                                                                                                                                                                                                                                                                                                                                                                                                                                                                                                                                                            |                                                                                                                                                                     |   |     |   |    |     |                |
| 833 | [b05ea]        |                                   | 5e. MamaBirthie CS available power                                                                                                                                                                                                                                                                                                                                                                                                                                                                                                                                                                                                                                                         | radio, Required<br><table border="1"> <tr> <td>1</td> <td>Yes</td> </tr> <tr> <td>0</td> <td>No</td> </tr> <tr> <td>-88</td> <td>Not applicable</td> </tr> </table> | 1 | Yes | 0 | No | -88 | Not applicable |
| 1   | Yes            |                                   |                                                                                                                                                                                                                                                                                                                                                                                                                                                                                                                                                                                                                                                                                            |                                                                                                                                                                     |   |     |   |    |     |                |
| 0   | No             |                                   |                                                                                                                                                                                                                                                                                                                                                                                                                                                                                                                                                                                                                                                                                            |                                                                                                                                                                     |   |     |   |    |     |                |
| -88 | Not applicable |                                   |                                                                                                                                                                                                                                                                                                                                                                                                                                                                                                                                                                                                                                                                                            |                                                                                                                                                                     |   |     |   |    |     |                |
| 834 | [b05f]         |                                   | MamaNatalie available                                                                                                                                                                                                                                                                                                                                                                                                                                                                                                                                                                                                                                                                      | yesno, Required<br><table border="1"> <tr> <td>1</td> <td>Yes</td> </tr> <tr> <td>0</td> <td>No</td> </tr> </table>                                                 | 1 | Yes | 0 | No |     |                |
| 1   | Yes            |                                   |                                                                                                                                                                                                                                                                                                                                                                                                                                                                                                                                                                                                                                                                                            |                                                                                                                                                                     |   |     |   |    |     |                |
| 0   | No             |                                   |                                                                                                                                                                                                                                                                                                                                                                                                                                                                                                                                                                                                                                                                                            |                                                                                                                                                                     |   |     |   |    |     |                |

|     |                |                                                            |                                                                                                                                                                     |   |     |   |    |     |                |
|-----|----------------|------------------------------------------------------------|---------------------------------------------------------------------------------------------------------------------------------------------------------------------|---|-----|---|----|-----|----------------|
| 835 | [ b05_f ]      | 5f. MamaNatalie in good working order                      | yesno, Required<br><table border="1"> <tr> <td>1</td> <td>Yes</td> </tr> <tr> <td>0</td> <td>No</td> </tr> </table>                                                 | 1 | Yes | 0 | No |     |                |
| 1   | Yes            |                                                            |                                                                                                                                                                     |   |     |   |    |     |                |
| 0   | No             |                                                            |                                                                                                                                                                     |   |     |   |    |     |                |
| 836 | [ b05fa ]      | 5f. MamaNatalie available power                            | radio, Required<br><table border="1"> <tr> <td>1</td> <td>Yes</td> </tr> <tr> <td>0</td> <td>No</td> </tr> <tr> <td>-88</td> <td>Not applicable</td> </tr> </table> | 1 | Yes | 0 | No | -88 | Not applicable |
| 1   | Yes            |                                                            |                                                                                                                                                                     |   |     |   |    |     |                |
| 0   | No             |                                                            |                                                                                                                                                                     |   |     |   |    |     |                |
| -88 | Not applicable |                                                            |                                                                                                                                                                     |   |     |   |    |     |                |
| 837 | [ b05g ]       | 5g. NeoNatalie Complete available                          | yesno, Required<br><table border="1"> <tr> <td>1</td> <td>Yes</td> </tr> <tr> <td>0</td> <td>No</td> </tr> </table>                                                 | 1 | Yes | 0 | No |     |                |
| 1   | Yes            |                                                            |                                                                                                                                                                     |   |     |   |    |     |                |
| 0   | No             |                                                            |                                                                                                                                                                     |   |     |   |    |     |                |
| 838 | [ b05_g ]      | 5g. NeoNatalie Complete in good working order              | yesno, Required<br><table border="1"> <tr> <td>1</td> <td>Yes</td> </tr> <tr> <td>0</td> <td>No</td> </tr> </table>                                                 | 1 | Yes | 0 | No |     |                |
| 1   | Yes            |                                                            |                                                                                                                                                                     |   |     |   |    |     |                |
| 0   | No             |                                                            |                                                                                                                                                                     |   |     |   |    |     |                |
| 839 | [ b05ga ]      | 5g. NeoNatalie Complete available power                    | radio, Required<br><table border="1"> <tr> <td>1</td> <td>Yes</td> </tr> <tr> <td>0</td> <td>No</td> </tr> <tr> <td>-88</td> <td>Not applicable</td> </tr> </table> | 1 | Yes | 0 | No | -88 | Not applicable |
| 1   | Yes            |                                                            |                                                                                                                                                                     |   |     |   |    |     |                |
| 0   | No             |                                                            |                                                                                                                                                                     |   |     |   |    |     |                |
| -88 | Not applicable |                                                            |                                                                                                                                                                     |   |     |   |    |     |                |
| 840 | [ b05h ]       | 5h. Neonatalie Live (NNL) available                        | yesno, Required<br><table border="1"> <tr> <td>1</td> <td>Yes</td> </tr> <tr> <td>0</td> <td>No</td> </tr> </table>                                                 | 1 | Yes | 0 | No |     |                |
| 1   | Yes            |                                                            |                                                                                                                                                                     |   |     |   |    |     |                |
| 0   | No             |                                                            |                                                                                                                                                                     |   |     |   |    |     |                |
| 841 | [ b05_h ]      | 5h. Neonatalie Live (NNL) in good working order            | yesno, Required<br><table border="1"> <tr> <td>1</td> <td>Yes</td> </tr> <tr> <td>0</td> <td>No</td> </tr> </table>                                                 | 1 | Yes | 0 | No |     |                |
| 1   | Yes            |                                                            |                                                                                                                                                                     |   |     |   |    |     |                |
| 0   | No             |                                                            |                                                                                                                                                                     |   |     |   |    |     |                |
| 842 | [ b05ha ]      | 5h. Neonatalie Live (NNL) available power                  | radio, Required<br><table border="1"> <tr> <td>1</td> <td>Yes</td> </tr> <tr> <td>0</td> <td>No</td> </tr> <tr> <td>-88</td> <td>Not applicable</td> </tr> </table> | 1 | Yes | 0 | No | -88 | Not applicable |
| 1   | Yes            |                                                            |                                                                                                                                                                     |   |     |   |    |     |                |
| 0   | No             |                                                            |                                                                                                                                                                     |   |     |   |    |     |                |
| -88 | Not applicable |                                                            |                                                                                                                                                                     |   |     |   |    |     |                |
| 843 | [ b05i ]       | 5i. Pre-emienatalie with Mama Breast available             | yesno, Required<br><table border="1"> <tr> <td>1</td> <td>Yes</td> </tr> <tr> <td>0</td> <td>No</td> </tr> </table>                                                 | 1 | Yes | 0 | No |     |                |
| 1   | Yes            |                                                            |                                                                                                                                                                     |   |     |   |    |     |                |
| 0   | No             |                                                            |                                                                                                                                                                     |   |     |   |    |     |                |
| 844 | [ b05_i ]      | 5i. Pre-emienatalie with Mama Breast in good working order | yesno, Required<br><table border="1"> <tr> <td>1</td> <td>Yes</td> </tr> <tr> <td>0</td> <td>No</td> </tr> </table>                                                 | 1 | Yes | 0 | No |     |                |
| 1   | Yes            |                                                            |                                                                                                                                                                     |   |     |   |    |     |                |
| 0   | No             |                                                            |                                                                                                                                                                     |   |     |   |    |     |                |
| 845 | [ b05ia ]      | 5i. Pre-emienatalie with Mama Breast available             | radio, Required<br><table border="1"> <tr> <td>1</td> <td>Yes</td> </tr> <tr> <td>0</td> <td>No</td> </tr> <tr> <td>-88</td> <td>Not applicable</td> </tr> </table> | 1 | Yes | 0 | No | -88 | Not applicable |
| 1   | Yes            |                                                            |                                                                                                                                                                     |   |     |   |    |     |                |
| 0   | No             |                                                            |                                                                                                                                                                     |   |     |   |    |     |                |
| -88 | Not applicable |                                                            |                                                                                                                                                                     |   |     |   |    |     |                |
| 846 | [ b05j ]       | 5j, Mama-U available                                       | yesno, Required                                                                                                                                                     |   |     |   |    |     |                |

|     |                |                                                          |                 |                                                                                                                                         |   |     |   |    |     |                |
|-----|----------------|----------------------------------------------------------|-----------------|-----------------------------------------------------------------------------------------------------------------------------------------|---|-----|---|----|-----|----------------|
|     |                |                                                          |                 | <table border="1"> <tr><td>1</td><td>Yes</td></tr> <tr><td>0</td><td>No</td></tr> </table>                                              | 1 | Yes | 0 | No |     |                |
| 1   | Yes            |                                                          |                 |                                                                                                                                         |   |     |   |    |     |                |
| 0   | No             |                                                          |                 |                                                                                                                                         |   |     |   |    |     |                |
| 847 | [ b05_j ]      | 5j. Mama-U in good working order                         | yesno, Required | <table border="1"> <tr><td>1</td><td>Yes</td></tr> <tr><td>0</td><td>No</td></tr> </table>                                              | 1 | Yes | 0 | No |     |                |
| 1   | Yes            |                                                          |                 |                                                                                                                                         |   |     |   |    |     |                |
| 0   | No             |                                                          |                 |                                                                                                                                         |   |     |   |    |     |                |
| 848 | [ b05ja ]      | 5j. Mama-U available power                               | radio, Required | <table border="1"> <tr><td>1</td><td>Yes</td></tr> <tr><td>0</td><td>No</td></tr> <tr><td>-88</td><td>Not applicable</td></tr> </table> | 1 | Yes | 0 | No | -88 | Not applicable |
| 1   | Yes            |                                                          |                 |                                                                                                                                         |   |     |   |    |     |                |
| 0   | No             |                                                          |                 |                                                                                                                                         |   |     |   |    |     |                |
| -88 | Not applicable |                                                          |                 |                                                                                                                                         |   |     |   |    |     |                |
| 849 | [ b05k ]       | 5k. Sister-U available                                   | yesno, Required | <table border="1"> <tr><td>1</td><td>Yes</td></tr> <tr><td>0</td><td>No</td></tr> </table>                                              | 1 | Yes | 0 | No |     |                |
| 1   | Yes            |                                                          |                 |                                                                                                                                         |   |     |   |    |     |                |
| 0   | No             |                                                          |                 |                                                                                                                                         |   |     |   |    |     |                |
| 850 | [ b05_k ]      | 5k. Sister-U in good working order                       | yesno, Required | <table border="1"> <tr><td>1</td><td>Yes</td></tr> <tr><td>0</td><td>No</td></tr> </table>                                              | 1 | Yes | 0 | No |     |                |
| 1   | Yes            |                                                          |                 |                                                                                                                                         |   |     |   |    |     |                |
| 0   | No             |                                                          |                 |                                                                                                                                         |   |     |   |    |     |                |
| 851 | [ b05ka ]      | 5k. Sister-U available power                             | radio, Required | <table border="1"> <tr><td>1</td><td>Yes</td></tr> <tr><td>0</td><td>No</td></tr> <tr><td>-88</td><td>Not applicable</td></tr> </table> | 1 | Yes | 0 | No | -88 | Not applicable |
| 1   | Yes            |                                                          |                 |                                                                                                                                         |   |     |   |    |     |                |
| 0   | No             |                                                          |                 |                                                                                                                                         |   |     |   |    |     |                |
| -88 | Not applicable |                                                          |                 |                                                                                                                                         |   |     |   |    |     |                |
| 852 | [ b05l ]       | 5l. Episiotomy trainer available                         | yesno, Required | <table border="1"> <tr><td>1</td><td>Yes</td></tr> <tr><td>0</td><td>No</td></tr> </table>                                              | 1 | Yes | 0 | No |     |                |
| 1   | Yes            |                                                          |                 |                                                                                                                                         |   |     |   |    |     |                |
| 0   | No             |                                                          |                 |                                                                                                                                         |   |     |   |    |     |                |
| 853 | [ b05_l ]      | 5l. Episiotomy trainer in good working order             | yesno, Required | <table border="1"> <tr><td>1</td><td>Yes</td></tr> <tr><td>0</td><td>No</td></tr> </table>                                              | 1 | Yes | 0 | No |     |                |
| 1   | Yes            |                                                          |                 |                                                                                                                                         |   |     |   |    |     |                |
| 0   | No             |                                                          |                 |                                                                                                                                         |   |     |   |    |     |                |
| 854 | [ b05la ]      | 5l. Episiotomy trainer available                         | radio, Required | <table border="1"> <tr><td>1</td><td>Yes</td></tr> <tr><td>0</td><td>No</td></tr> <tr><td>-88</td><td>Not applicable</td></tr> </table> | 1 | Yes | 0 | No | -88 | Not applicable |
| 1   | Yes            |                                                          |                 |                                                                                                                                         |   |     |   |    |     |                |
| 0   | No             |                                                          |                 |                                                                                                                                         |   |     |   |    |     |                |
| -88 | Not applicable |                                                          |                 |                                                                                                                                         |   |     |   |    |     |                |
| 855 | [ b05m ]       | 5m. Labia repair model (Pack of 6) available             | yesno, Required | <table border="1"> <tr><td>1</td><td>Yes</td></tr> <tr><td>0</td><td>No</td></tr> </table>                                              | 1 | Yes | 0 | No |     |                |
| 1   | Yes            |                                                          |                 |                                                                                                                                         |   |     |   |    |     |                |
| 0   | No             |                                                          |                 |                                                                                                                                         |   |     |   |    |     |                |
| 856 | [ b05_m ]      | 5m. Labia repair model (Pack of 6) in good working order | yesno, Required | <table border="1"> <tr><td>1</td><td>Yes</td></tr> <tr><td>0</td><td>No</td></tr> </table>                                              | 1 | Yes | 0 | No |     |                |
| 1   | Yes            |                                                          |                 |                                                                                                                                         |   |     |   |    |     |                |
| 0   | No             |                                                          |                 |                                                                                                                                         |   |     |   |    |     |                |
| 857 | [ b05ma ]      | 5m. Labia repair model (Pack of 6) available power       | radio, Required | <table border="1"> <tr><td>1</td><td>Yes</td></tr> <tr><td>0</td><td>No</td></tr> </table>                                              | 1 | Yes | 0 | No |     |                |
| 1   | Yes            |                                                          |                 |                                                                                                                                         |   |     |   |    |     |                |
| 0   | No             |                                                          |                 |                                                                                                                                         |   |     |   |    |     |                |

|     |                |                                                      |                 |                                                                                                                                                  |   |     |   |    |     |                |
|-----|----------------|------------------------------------------------------|-----------------|--------------------------------------------------------------------------------------------------------------------------------------------------|---|-----|---|----|-----|----------------|
|     |                |                                                      |                 | -88   Not applicable                                                                                                                             |   |     |   |    |     |                |
| 858 | [ b05n ]       | 5n. Female catheterisation available                 | yesno, Required | <table border="1"> <tr> <td>1</td> <td>Yes</td> </tr> <tr> <td>0</td> <td>No</td> </tr> </table>                                                 | 1 | Yes | 0 | No |     |                |
| 1   | Yes            |                                                      |                 |                                                                                                                                                  |   |     |   |    |     |                |
| 0   | No             |                                                      |                 |                                                                                                                                                  |   |     |   |    |     |                |
| 859 | [ b05_n ]      | 5n. Female catheterisation in good working order     | yesno, Required | <table border="1"> <tr> <td>1</td> <td>Yes</td> </tr> <tr> <td>0</td> <td>No</td> </tr> </table>                                                 | 1 | Yes | 0 | No |     |                |
| 1   | Yes            |                                                      |                 |                                                                                                                                                  |   |     |   |    |     |                |
| 0   | No             |                                                      |                 |                                                                                                                                                  |   |     |   |    |     |                |
| 860 | [ b05na ]      | 5n. Female catheterisation available power           | radio, Required | <table border="1"> <tr> <td>1</td> <td>Yes</td> </tr> <tr> <td>0</td> <td>No</td> </tr> <tr> <td>-88</td> <td>Not applicable</td> </tr> </table> | 1 | Yes | 0 | No | -88 | Not applicable |
| 1   | Yes            |                                                      |                 |                                                                                                                                                  |   |     |   |    |     |                |
| 0   | No             |                                                      |                 |                                                                                                                                                  |   |     |   |    |     |                |
| -88 | Not applicable |                                                      |                 |                                                                                                                                                  |   |     |   |    |     |                |
| 861 | [ b05o ]       | 5o. Adult IV Arm available                           | yesno, Required | <table border="1"> <tr> <td>1</td> <td>Yes</td> </tr> <tr> <td>0</td> <td>No</td> </tr> </table>                                                 | 1 | Yes | 0 | No |     |                |
| 1   | Yes            |                                                      |                 |                                                                                                                                                  |   |     |   |    |     |                |
| 0   | No             |                                                      |                 |                                                                                                                                                  |   |     |   |    |     |                |
| 862 | [ b05_o ]      | 5o. Adult IV Arm in good working order               | yesno, Required | <table border="1"> <tr> <td>1</td> <td>Yes</td> </tr> <tr> <td>0</td> <td>No</td> </tr> </table>                                                 | 1 | Yes | 0 | No |     |                |
| 1   | Yes            |                                                      |                 |                                                                                                                                                  |   |     |   |    |     |                |
| 0   | No             |                                                      |                 |                                                                                                                                                  |   |     |   |    |     |                |
| 863 | [ b05oa ]      | 5o. Adult IV Arm available power                     | radio, Required | <table border="1"> <tr> <td>1</td> <td>Yes</td> </tr> <tr> <td>0</td> <td>No</td> </tr> <tr> <td>-88</td> <td>Not applicable</td> </tr> </table> | 1 | Yes | 0 | No | -88 | Not applicable |
| 1   | Yes            |                                                      |                 |                                                                                                                                                  |   |     |   |    |     |                |
| 0   | No             |                                                      |                 |                                                                                                                                                  |   |     |   |    |     |                |
| -88 | Not applicable |                                                      |                 |                                                                                                                                                  |   |     |   |    |     |                |
| 864 | [ b05p ]       | 5p. IM Injection trainer available                   | yesno, Required | <table border="1"> <tr> <td>1</td> <td>Yes</td> </tr> <tr> <td>0</td> <td>No</td> </tr> </table>                                                 | 1 | Yes | 0 | No |     |                |
| 1   | Yes            |                                                      |                 |                                                                                                                                                  |   |     |   |    |     |                |
| 0   | No             |                                                      |                 |                                                                                                                                                  |   |     |   |    |     |                |
| 865 | [ b05_p ]      | 5p. IM Injection trainer in good working order       | yesno, Required | <table border="1"> <tr> <td>1</td> <td>Yes</td> </tr> <tr> <td>0</td> <td>No</td> </tr> </table>                                                 | 1 | Yes | 0 | No |     |                |
| 1   | Yes            |                                                      |                 |                                                                                                                                                  |   |     |   |    |     |                |
| 0   | No             |                                                      |                 |                                                                                                                                                  |   |     |   |    |     |                |
| 866 | [ b05pa ]      | 5p. IM Injection trainer available power             | radio, Required | <table border="1"> <tr> <td>1</td> <td>Yes</td> </tr> <tr> <td>0</td> <td>No</td> </tr> <tr> <td>-88</td> <td>Not applicable</td> </tr> </table> | 1 | Yes | 0 | No | -88 | Not applicable |
| 1   | Yes            |                                                      |                 |                                                                                                                                                  |   |     |   |    |     |                |
| 0   | No             |                                                      |                 |                                                                                                                                                  |   |     |   |    |     |                |
| -88 | Not applicable |                                                      |                 |                                                                                                                                                  |   |     |   |    |     |                |
| 867 | [ b05q ]       | 5q. Little Anne Combo (6-pack) available             | yesno, Required | <table border="1"> <tr> <td>1</td> <td>Yes</td> </tr> <tr> <td>0</td> <td>No</td> </tr> </table>                                                 | 1 | Yes | 0 | No |     |                |
| 1   | Yes            |                                                      |                 |                                                                                                                                                  |   |     |   |    |     |                |
| 0   | No             |                                                      |                 |                                                                                                                                                  |   |     |   |    |     |                |
| 868 | [ b05_q ]      | 5q. Little Anne Combo (6-pack) in good working order | yesno, Required | <table border="1"> <tr> <td>1</td> <td>Yes</td> </tr> <tr> <td>0</td> <td>No</td> </tr> </table>                                                 | 1 | Yes | 0 | No |     |                |
| 1   | Yes            |                                                      |                 |                                                                                                                                                  |   |     |   |    |     |                |
| 0   | No             |                                                      |                 |                                                                                                                                                  |   |     |   |    |     |                |

|     |                                               |                                                                                                                                                                         |                                                                                                                                                                     |   |     |   |    |     |                |
|-----|-----------------------------------------------|-------------------------------------------------------------------------------------------------------------------------------------------------------------------------|---------------------------------------------------------------------------------------------------------------------------------------------------------------------|---|-----|---|----|-----|----------------|
| 869 | [ b05qa ]                                     | 5q. Little Anne Combo (6-pack) available power                                                                                                                          | radio, Required<br><table border="1"> <tr> <td>1</td> <td>Yes</td> </tr> <tr> <td>0</td> <td>No</td> </tr> <tr> <td>-88</td> <td>Not applicable</td> </tr> </table> | 1 | Yes | 0 | No | -88 | Not applicable |
| 1   | Yes                                           |                                                                                                                                                                         |                                                                                                                                                                     |   |     |   |    |     |                |
| 0   | No                                            |                                                                                                                                                                         |                                                                                                                                                                     |   |     |   |    |     |                |
| -88 | Not applicable                                |                                                                                                                                                                         |                                                                                                                                                                     |   |     |   |    |     |                |
| 870 | [ c07 ]                                       | 7. Any other comments about use of the skills lab (including maintenance of equipment)                                                                                  | notes                                                                                                                                                               |   |     |   |    |     |                |
| 871 | [ d01 ]                                       | Section Header: <i>Section G: Training corners infrastructure 1</i><br>1. Training corner or room for conducting practical training sessions in the hospital available? | radio, Required<br><table border="1"> <tr> <td>1</td> <td>Yes</td> </tr> <tr> <td>0</td> <td>No</td> </tr> <tr> <td>-88</td> <td>Not applicable</td> </tr> </table> | 1 | Yes | 0 | No | -88 | Not applicable |
| 1   | Yes                                           |                                                                                                                                                                         |                                                                                                                                                                     |   |     |   |    |     |                |
| 0   | No                                            |                                                                                                                                                                         |                                                                                                                                                                     |   |     |   |    |     |                |
| -88 | Not applicable                                |                                                                                                                                                                         |                                                                                                                                                                     |   |     |   |    |     |                |
| 872 | [ d02 ]<br>Show the field ONLY if: [d01] = 1  | 2. Number of windows                                                                                                                                                    | text, Required                                                                                                                                                      |   |     |   |    |     |                |
| 873 | [ d02b ]<br>Show the field ONLY if: [d01] = 1 | 2b. Can the windows be locked?                                                                                                                                          | yesno, Required<br><table border="1"> <tr> <td>1</td> <td>Yes</td> </tr> <tr> <td>0</td> <td>No</td> </tr> </table>                                                 | 1 | Yes | 0 | No |     |                |
| 1   | Yes                                           |                                                                                                                                                                         |                                                                                                                                                                     |   |     |   |    |     |                |
| 0   | No                                            |                                                                                                                                                                         |                                                                                                                                                                     |   |     |   |    |     |                |
| 874 | [ d02c ]<br>Show the field ONLY if: [d01] = 1 | 2c. Record dimensions for each window                                                                                                                                   | text, Required                                                                                                                                                      |   |     |   |    |     |                |
| 875 | [ d02d ]<br>Show the field ONLY if: [d01] = 1 | 2d. Upload pictures of each window (where applicable)                                                                                                                   | file                                                                                                                                                                |   |     |   |    |     |                |
| 876 | [ d03 ]<br>Show the field ONLY if: [d01] = 1  | 3. Number of doors                                                                                                                                                      | text, Required                                                                                                                                                      |   |     |   |    |     |                |
| 877 | [ d03b ]<br>Show the field ONLY if: [d01] = 1 | 3b. Can the doors be locked?                                                                                                                                            | yesno, Required<br><table border="1"> <tr> <td>1</td> <td>Yes</td> </tr> <tr> <td>0</td> <td>No</td> </tr> </table>                                                 | 1 | Yes | 0 | No |     |                |
| 1   | Yes                                           |                                                                                                                                                                         |                                                                                                                                                                     |   |     |   |    |     |                |
| 0   | No                                            |                                                                                                                                                                         |                                                                                                                                                                     |   |     |   |    |     |                |
| 878 | [ d03c ]<br>Show the field ONLY if: [d01] = 1 | 3c. Record dimensions for doors                                                                                                                                         | text, Required                                                                                                                                                      |   |     |   |    |     |                |
| 879 | [ d03d ]<br>Show the field ONLY if: [d01] = 1 | 3d. Upload pictures of each door (where applicable)                                                                                                                     | file                                                                                                                                                                |   |     |   |    |     |                |

|     |                                               |                                                                                                                                                                                                |                                                                                                                                                            |   |            |   |            |     |                |
|-----|-----------------------------------------------|------------------------------------------------------------------------------------------------------------------------------------------------------------------------------------------------|------------------------------------------------------------------------------------------------------------------------------------------------------------|---|------------|---|------------|-----|----------------|
| 880 | [ d04a ]<br>Show the field ONLY if: [d01] = 1 | 4. Describe the type or condition of floor space                                                                                                                                               | notes, Required                                                                                                                                            |   |            |   |            |     |                |
| 881 | [ d04b ]<br>Show the field ONLY if: [d01] = 1 | 4b. Record dimensions of floor space                                                                                                                                                           | text, Required                                                                                                                                             |   |            |   |            |     |                |
| 882 | [ d04c ]<br>Show the field ONLY if: [d01] = 1 | 4c. Upload pictures of floor space (where applicable)                                                                                                                                          | file                                                                                                                                                       |   |            |   |            |     |                |
| 883 | [ d04 ]<br>Show the field ONLY if: [d01] = 1  | 5. Can students access it at other times on their own for skills practice?                                                                                                                     | radio, Required<br><table border="1"> <tr><td>1</td><td>Yes</td></tr> <tr><td>0</td><td>No</td></tr> <tr><td>-88</td><td>Not applicable</td></tr> </table> | 1 | Yes        | 0 | No         | -88 | Not applicable |
| 1   | Yes                                           |                                                                                                                                                                                                |                                                                                                                                                            |   |            |   |            |     |                |
| 0   | No                                            |                                                                                                                                                                                                |                                                                                                                                                            |   |            |   |            |     |                |
| -88 | Not applicable                                |                                                                                                                                                                                                |                                                                                                                                                            |   |            |   |            |     |                |
| 884 | [ d05 ]<br>Show the field ONLY if: [d01] = 1  | 6. Is there a full set of equipment in the training corner?                                                                                                                                    | radio, Required<br><table border="1"> <tr><td>1</td><td>Yes</td></tr> <tr><td>0</td><td>No</td></tr> <tr><td>-88</td><td>Not applicable</td></tr> </table> | 1 | Yes        | 0 | No         | -88 | Not applicable |
| 1   | Yes                                           |                                                                                                                                                                                                |                                                                                                                                                            |   |            |   |            |     |                |
| 0   | No                                            |                                                                                                                                                                                                |                                                                                                                                                            |   |            |   |            |     |                |
| -88 | Not applicable                                |                                                                                                                                                                                                |                                                                                                                                                            |   |            |   |            |     |                |
| 885 | [ d05a ]<br>Show the field ONLY if: [d01] = 1 | 6a. Is the set of equipment in good working order?                                                                                                                                             | radio, Required<br><table border="1"> <tr><td>1</td><td>Yes</td></tr> <tr><td>0</td><td>No</td></tr> <tr><td>-88</td><td>Not applicable</td></tr> </table> | 1 | Yes        | 0 | No         | -88 | Not applicable |
| 1   | Yes                                           |                                                                                                                                                                                                |                                                                                                                                                            |   |            |   |            |     |                |
| 0   | No                                            |                                                                                                                                                                                                |                                                                                                                                                            |   |            |   |            |     |                |
| -88 | Not applicable                                |                                                                                                                                                                                                |                                                                                                                                                            |   |            |   |            |     |                |
| 886 | [ d06 ]<br>Show the field ONLY if: [d01] = 1  | 7. Can the equipment be connected to a power source?                                                                                                                                           | radio, Required<br><table border="1"> <tr><td>1</td><td>Yes</td></tr> <tr><td>0</td><td>No</td></tr> <tr><td>-88</td><td>Not applicable</td></tr> </table> | 1 | Yes        | 0 | No         | -88 | Not applicable |
| 1   | Yes                                           |                                                                                                                                                                                                |                                                                                                                                                            |   |            |   |            |     |                |
| 0   | No                                            |                                                                                                                                                                                                |                                                                                                                                                            |   |            |   |            |     |                |
| -88 | Not applicable                                |                                                                                                                                                                                                |                                                                                                                                                            |   |            |   |            |     |                |
| 887 | [ d07 ]                                       | 8. Any other comments about use of the training corner in the hospital (including maintenance of equipment)                                                                                    | notes                                                                                                                                                      |   |            |   |            |     |                |
| 888 | [ f01 ]                                       | Section Header: <i>Section H: Experience implementing updated curriculum</i><br>1. What is your experience in implementing the new updated curriculum integrated with EmONC/MNH interventions? | notes, Required                                                                                                                                            |   |            |   |            |     |                |
| 889 | [ f02 ]                                       | 2. What are the bottlenecks experienced in implementing the updated curriculum at the institution?                                                                                             | notes, Required                                                                                                                                            |   |            |   |            |     |                |
| 890 | [ institutional_assessment_tool_v4_complete ] | Section Header: <i>Form Status</i><br>Complete?                                                                                                                                                | dropdown<br><table border="1"> <tr><td>0</td><td>Incomplete</td></tr> <tr><td>1</td><td>Unverified</td></tr> </table>                                      | 0 | Incomplete | 1 | Unverified |     |                |
| 0   | Incomplete                                    |                                                                                                                                                                                                |                                                                                                                                                            |   |            |   |            |     |                |
| 1   | Unverified                                    |                                                                                                                                                                                                |                                                                                                                                                            |   |            |   |            |     |                |

2 Complete

|                                                                                                                      |
|----------------------------------------------------------------------------------------------------------------------|
| Instrument: <b>Teaching Observation Form_V3</b> (teaching_observation_form_v3) [collapsed]                           |
| Instrument: <b>Staff retention initial online survey</b> (staff_retention_initial_online_survey) [collapsed]         |
| Instrument: <b>NMCN checklist Headquarters_V2</b> (nmcn_checklist_headquarters_v2) [collapsed]                       |
| Instrument: <b>OSCE Basic Life Support Of The Newborn V2</b> (osce_basic_life_support_of_the_newborn_v2) [collapsed] |
| Instrument: <b>OSCE Management Of PPH_V3</b> (osce_management_of_pph_v3) [collapsed]                                 |
| Instrument: <b>OSCE Labour Care Guide (LCG)_V1</b> (osce_labour_care_guide_lcg_v1) [collapsed]                       |
| Instrument: <b>NMCN checklist Zonal Office_V2</b> (nmcn_checklist_zonal_office_v2) [collapsed]                       |

## Data Dictionary Codebook

2025-01-28 1:58pm

| #                                                                                                                  | Variable / Field Name                                    | Field Label<br><i>Field Note</i>                                                  | Field Attributes (Field Type, Validation, Choices, Calculations, etc.)                                                                                                                                                                                                                                                                                                                                                                                                                            |   |                                                    |   |                                                          |   |       |   |       |   |      |   |      |   |        |   |         |   |        |    |         |    |           |
|--------------------------------------------------------------------------------------------------------------------|----------------------------------------------------------|-----------------------------------------------------------------------------------|---------------------------------------------------------------------------------------------------------------------------------------------------------------------------------------------------------------------------------------------------------------------------------------------------------------------------------------------------------------------------------------------------------------------------------------------------------------------------------------------------|---|----------------------------------------------------|---|----------------------------------------------------------|---|-------|---|-------|---|------|---|------|---|--------|---|---------|---|--------|----|---------|----|-----------|
| Instrument: <b>Students Maternal Shock Scenario</b> (students_maternal_shock_scenario) [collapsed]                 |                                                          |                                                                                   |                                                                                                                                                                                                                                                                                                                                                                                                                                                                                                   |   |                                                    |   |                                                          |   |       |   |       |   |      |   |      |   |        |   |         |   |        |    |         |    |           |
| Instrument: <b>BMGF Nigeria Maternal Mortality Baseline</b> (bmgf_nigeria_maternal_mortality_baseline) [collapsed] |                                                          |                                                                                   |                                                                                                                                                                                                                                                                                                                                                                                                                                                                                                   |   |                                                    |   |                                                          |   |       |   |       |   |      |   |      |   |        |   |         |   |        |    |         |    |           |
| Instrument: <b>Data demo</b> (data_demo) [collapsed]                                                               |                                                          |                                                                                   |                                                                                                                                                                                                                                                                                                                                                                                                                                                                                                   |   |                                                    |   |                                                          |   |       |   |       |   |      |   |      |   |        |   |         |   |        |    |         |    |           |
| Instrument: <b>Institutional assessment tool_V2</b> (institutional_assessment_tool_v2) [collapsed]                 |                                                          |                                                                                   |                                                                                                                                                                                                                                                                                                                                                                                                                                                                                                   |   |                                                    |   |                                                          |   |       |   |       |   |      |   |      |   |        |   |         |   |        |    |         |    |           |
| Instrument: <b>Teaching Observation Form_V3</b> (teaching_observation_form_v3)                                     |                                                          |                                                                                   |                                                                                                                                                                                                                                                                                                                                                                                                                                                                                                   |   |                                                    |   |                                                          |   |       |   |       |   |      |   |      |   |        |   |         |   |        |    |         |    |           |
| 854                                                                                                                | [aa01]                                                   | Section Header: <i>Section A: Demographics</i><br>1. Lecturer identification code | text (number), Required                                                                                                                                                                                                                                                                                                                                                                                                                                                                           |   |                                                    |   |                                                          |   |       |   |       |   |      |   |      |   |        |   |         |   |        |    |         |    |           |
| 855                                                                                                                | [aa02]                                                   | 2. State                                                                          | dropdown, Required <table border="1" style="width: 100%; border-collapse: collapse;"> <tr><td>1</td><td>Katsina</td></tr> <tr><td>2</td><td>Bauchi</td></tr> <tr><td>3</td><td>Borno</td></tr> <tr><td>4</td><td>Niger</td></tr> <tr><td>5</td><td>Yobe</td></tr> <tr><td>6</td><td>Kano</td></tr> <tr><td>7</td><td>Kaduna</td></tr> <tr><td>8</td><td>Plateau</td></tr> <tr><td>9</td><td>Ebonyi</td></tr> <tr><td>10</td><td>Zamfara</td></tr> <tr><td>11</td><td>Akwa Ibom</td></tr> </table> | 1 | Katsina                                            | 2 | Bauchi                                                   | 3 | Borno | 4 | Niger | 5 | Yobe | 6 | Kano | 7 | Kaduna | 8 | Plateau | 9 | Ebonyi | 10 | Zamfara | 11 | Akwa Ibom |
| 1                                                                                                                  | Katsina                                                  |                                                                                   |                                                                                                                                                                                                                                                                                                                                                                                                                                                                                                   |   |                                                    |   |                                                          |   |       |   |       |   |      |   |      |   |        |   |         |   |        |    |         |    |           |
| 2                                                                                                                  | Bauchi                                                   |                                                                                   |                                                                                                                                                                                                                                                                                                                                                                                                                                                                                                   |   |                                                    |   |                                                          |   |       |   |       |   |      |   |      |   |        |   |         |   |        |    |         |    |           |
| 3                                                                                                                  | Borno                                                    |                                                                                   |                                                                                                                                                                                                                                                                                                                                                                                                                                                                                                   |   |                                                    |   |                                                          |   |       |   |       |   |      |   |      |   |        |   |         |   |        |    |         |    |           |
| 4                                                                                                                  | Niger                                                    |                                                                                   |                                                                                                                                                                                                                                                                                                                                                                                                                                                                                                   |   |                                                    |   |                                                          |   |       |   |       |   |      |   |      |   |        |   |         |   |        |    |         |    |           |
| 5                                                                                                                  | Yobe                                                     |                                                                                   |                                                                                                                                                                                                                                                                                                                                                                                                                                                                                                   |   |                                                    |   |                                                          |   |       |   |       |   |      |   |      |   |        |   |         |   |        |    |         |    |           |
| 6                                                                                                                  | Kano                                                     |                                                                                   |                                                                                                                                                                                                                                                                                                                                                                                                                                                                                                   |   |                                                    |   |                                                          |   |       |   |       |   |      |   |      |   |        |   |         |   |        |    |         |    |           |
| 7                                                                                                                  | Kaduna                                                   |                                                                                   |                                                                                                                                                                                                                                                                                                                                                                                                                                                                                                   |   |                                                    |   |                                                          |   |       |   |       |   |      |   |      |   |        |   |         |   |        |    |         |    |           |
| 8                                                                                                                  | Plateau                                                  |                                                                                   |                                                                                                                                                                                                                                                                                                                                                                                                                                                                                                   |   |                                                    |   |                                                          |   |       |   |       |   |      |   |      |   |        |   |         |   |        |    |         |    |           |
| 9                                                                                                                  | Ebonyi                                                   |                                                                                   |                                                                                                                                                                                                                                                                                                                                                                                                                                                                                                   |   |                                                    |   |                                                          |   |       |   |       |   |      |   |      |   |        |   |         |   |        |    |         |    |           |
| 10                                                                                                                 | Zamfara                                                  |                                                                                   |                                                                                                                                                                                                                                                                                                                                                                                                                                                                                                   |   |                                                    |   |                                                          |   |       |   |       |   |      |   |      |   |        |   |         |   |        |    |         |    |           |
| 11                                                                                                                 | Akwa Ibom                                                |                                                                                   |                                                                                                                                                                                                                                                                                                                                                                                                                                                                                                   |   |                                                    |   |                                                          |   |       |   |       |   |      |   |      |   |        |   |         |   |        |    |         |    |           |
| 856                                                                                                                | [aa02a]<br>Show the field ONLY if:<br>[aa02] = '1'       | 2a. Katsina state facilities                                                      | dropdown, Required <table border="1" style="width: 100%; border-collapse: collapse;"> <tr><td>1</td><td>Katsina State College of Nursing Sciences, Katsina</td></tr> <tr><td>2</td><td>Nana Bojo College of Nursing Sciences, Malumfashi Campus</td></tr> </table>                                                                                                                                                                                                                                | 1 | Katsina State College of Nursing Sciences, Katsina | 2 | Nana Bojo College of Nursing Sciences, Malumfashi Campus |   |       |   |       |   |      |   |      |   |        |   |         |   |        |    |         |    |           |
| 1                                                                                                                  | Katsina State College of Nursing Sciences, Katsina       |                                                                                   |                                                                                                                                                                                                                                                                                                                                                                                                                                                                                                   |   |                                                    |   |                                                          |   |       |   |       |   |      |   |      |   |        |   |         |   |        |    |         |    |           |
| 2                                                                                                                  | Nana Bojo College of Nursing Sciences, Malumfashi Campus |                                                                                   |                                                                                                                                                                                                                                                                                                                                                                                                                                                                                                   |   |                                                    |   |                                                          |   |       |   |       |   |      |   |      |   |        |   |         |   |        |    |         |    |           |
| 857                                                                                                                | [aa02b]<br>Show the field ONLY if:<br>[aa02] = '2'       | 2b. Bauchi state facilities                                                       | dropdown, Required <table border="1" style="width: 100%; border-collapse: collapse;"> <tr><td>1</td><td>ATBUTH College of Nursing Sciences, Bauchi</td></tr> <tr><td>2</td><td>Adamu College of Nursing Sciences, Azare Bauchi</td></tr> </table>                                                                                                                                                                                                                                                 | 1 | ATBUTH College of Nursing Sciences, Bauchi         | 2 | Adamu College of Nursing Sciences, Azare Bauchi          |   |       |   |       |   |      |   |      |   |        |   |         |   |        |    |         |    |           |
| 1                                                                                                                  | ATBUTH College of Nursing Sciences, Bauchi               |                                                                                   |                                                                                                                                                                                                                                                                                                                                                                                                                                                                                                   |   |                                                    |   |                                                          |   |       |   |       |   |      |   |      |   |        |   |         |   |        |    |         |    |           |
| 2                                                                                                                  | Adamu College of Nursing Sciences, Azare Bauchi          |                                                                                   |                                                                                                                                                                                                                                                                                                                                                                                                                                                                                                   |   |                                                    |   |                                                          |   |       |   |       |   |      |   |      |   |        |   |         |   |        |    |         |    |           |
| 858                                                                                                                | [aa02c]<br>Show the field ONLY if:                       | 2c. Borno state facilities                                                        | dropdown, Required <table border="1" style="width: 100%; border-collapse: collapse;"> <tr><td>1</td><td>Borno State College of Nursing Sciences, Maiduguri</td></tr> </table>                                                                                                                                                                                                                                                                                                                     | 1 | Borno State College of Nursing Sciences, Maiduguri |   |                                                          |   |       |   |       |   |      |   |      |   |        |   |         |   |        |    |         |    |           |
| 1                                                                                                                  | Borno State College of Nursing Sciences, Maiduguri       |                                                                                   |                                                                                                                                                                                                                                                                                                                                                                                                                                                                                                   |   |                                                    |   |                                                          |   |       |   |       |   |      |   |      |   |        |   |         |   |        |    |         |    |           |

|     |         |                                       |                                |                                                                                                                        |
|-----|---------|---------------------------------------|--------------------------------|------------------------------------------------------------------------------------------------------------------------|
|     |         | [aa02] = '3'                          |                                | 2 University of Maiduguri College of Nursing Sciences                                                                  |
| 859 | [aa02d] | Show the field ONLY if: [aa02] = '4'  | 2d. Niger state facilities     | dropdown, Required<br>1 College of Nursing Sciences, Bida<br>2 College of Nursing Sciences, Kontagora                  |
| 860 | [aa02e] | Show the field ONLY if: [aa02] = '5'  | 2e. Yobe state facilities      | dropdown, Required<br>1 Shehu Sule College of Nursing Sciences, Damatutru<br>2 College of Nursing Sciences, FMC, Nguru |
| 861 | [aa02f] | Show the field ONLY if: [aa02] = '6'  | 2f. Kano state facilities      | dropdown, Required<br>1 College of Nursing Sciences, Kano<br>2 College of Nursing Sciences, Gwarzo Kano                |
| 862 | [aa02g] | Show the field ONLY if: [aa02] = '7'  | 2g. Kaduna state facilities    | dropdown, Required<br>1 College of Nursing Sciences, Tudun Wada, Kaduna<br>2 College of Nursing Sciences, ABUTH, Zaria |
| 863 | [aa02h] | Show the field ONLY if: [aa02] = '8'  | 2h. Plateau state facilities   | dropdown, Required<br>1 College of Nursing Sciences, JOS<br>2 College of Nursing Sciences, JUTH, JOS                   |
| 864 | [aa02i] | Show the field ONLY if: [aa02] = '9'  | 2i. Ebonyi state facilities    | dropdown, Required<br>1 College of Nursing Sciences, Abakaliki<br>2 College of Nursing Sciences, Uburu                 |
| 865 | [aa02j] | Show the field ONLY if: [aa02] = '10' | 2j. Zamfara state facilities   | dropdown, Required<br>1 College of Nursing Sciences, Gusau                                                             |
| 866 | [aa02k] | Show the field ONLY if: [aa02] = '11' | 2k. Akwa Ibom state facilities | dropdown, Required<br>1 College of Nursing Sciences, Anua Uyo                                                          |
| 867 | [aa04]  |                                       | 4. Observer's name             | text, Required                                                                                                         |
| 868 | [aa05]  |                                       | 5. What is the course title?   | text, Required                                                                                                         |
| 869 | [aa06]  |                                       | 6. What is the topic covered?  | notes, Required                                                                                                        |
| 870 | [aa07]  |                                       | 7. Type of session             | radio, Required<br>1 Lecture                                                                                           |

|     |                                                       |                                                                                                                                                                                                   |                         |                                                                                                                                                                                                                    |   |                         |                                                  |                        |           |                                   |   |                    |
|-----|-------------------------------------------------------|---------------------------------------------------------------------------------------------------------------------------------------------------------------------------------------------------|-------------------------|--------------------------------------------------------------------------------------------------------------------------------------------------------------------------------------------------------------------|---|-------------------------|--------------------------------------------------|------------------------|-----------|-----------------------------------|---|--------------------|
|     |                                                       |                                                                                                                                                                                                   |                         | 2 Practical                                                                                                                                                                                                        |   |                         |                                                  |                        |           |                                   |   |                    |
| 871 | [aa08]                                                | 8. Class Level                                                                                                                                                                                    | radio, Required         | <table border="1"> <tr><td>1</td><td>First year</td></tr> <tr><td>2</td><td>Second year</td></tr> <tr><td>3</td><td>Third year</td></tr> <tr><td>4</td><td>Fourth year</td></tr> </table>                          | 1 | First year              | 2                                                | Second year            | 3         | Third year                        | 4 | Fourth year        |
| 1   | First year                                            |                                                                                                                                                                                                   |                         |                                                                                                                                                                                                                    |   |                         |                                                  |                        |           |                                   |   |                    |
| 2   | Second year                                           |                                                                                                                                                                                                   |                         |                                                                                                                                                                                                                    |   |                         |                                                  |                        |           |                                   |   |                    |
| 3   | Third year                                            |                                                                                                                                                                                                   |                         |                                                                                                                                                                                                                    |   |                         |                                                  |                        |           |                                   |   |                    |
| 4   | Fourth year                                           |                                                                                                                                                                                                   |                         |                                                                                                                                                                                                                    |   |                         |                                                  |                        |           |                                   |   |                    |
| 872 | [aa09]                                                | 9. Number of students in class observed                                                                                                                                                           | text (number), Required |                                                                                                                                                                                                                    |   |                         |                                                  |                        |           |                                   |   |                    |
| 873 | [aa010]                                               | 10. Do you have a valid practice license?                                                                                                                                                         | yesno, Required         | <table border="1"> <tr><td>1</td><td>Yes</td></tr> <tr><td>0</td><td>No</td></tr> </table>                                                                                                                         | 1 | Yes                     | 0                                                | No                     |           |                                   |   |                    |
| 1   | Yes                                                   |                                                                                                                                                                                                   |                         |                                                                                                                                                                                                                    |   |                         |                                                  |                        |           |                                   |   |                    |
| 0   | No                                                    |                                                                                                                                                                                                   |                         |                                                                                                                                                                                                                    |   |                         |                                                  |                        |           |                                   |   |                    |
| 874 | [aa010b]                                              | 11. As an educator, do you also provide midwifery services in a health facility?                                                                                                                  | yesno, Required         | <table border="1"> <tr><td>1</td><td>Yes</td></tr> <tr><td>0</td><td>No</td></tr> </table>                                                                                                                         | 1 | Yes                     | 0                                                | No                     |           |                                   |   |                    |
| 1   | Yes                                                   |                                                                                                                                                                                                   |                         |                                                                                                                                                                                                                    |   |                         |                                                  |                        |           |                                   |   |                    |
| 0   | No                                                    |                                                                                                                                                                                                   |                         |                                                                                                                                                                                                                    |   |                         |                                                  |                        |           |                                   |   |                    |
| 875 | [aa010c]<br>Show the field ONLY if:<br>[aa010b] = '1' | 12. How often do you provide midwifery care?                                                                                                                                                      | radio, Required         | <table border="1"> <tr><td>1</td><td>1-2 hours</td></tr> <tr><td>2</td><td>3-4 hours</td></tr> <tr><td>3</td><td>5-6 hours</td></tr> <tr><td>4</td><td>More than 7 hours</td></tr> </table>                        | 1 | 1-2 hours               | 2                                                | 3-4 hours              | 3         | 5-6 hours                         | 4 | More than 7 hours  |
| 1   | 1-2 hours                                             |                                                                                                                                                                                                   |                         |                                                                                                                                                                                                                    |   |                         |                                                  |                        |           |                                   |   |                    |
| 2   | 3-4 hours                                             |                                                                                                                                                                                                   |                         |                                                                                                                                                                                                                    |   |                         |                                                  |                        |           |                                   |   |                    |
| 3   | 5-6 hours                                             |                                                                                                                                                                                                   |                         |                                                                                                                                                                                                                    |   |                         |                                                  |                        |           |                                   |   |                    |
| 4   | More than 7 hours                                     |                                                                                                                                                                                                   |                         |                                                                                                                                                                                                                    |   |                         |                                                  |                        |           |                                   |   |                    |
| 876 | [aa011]                                               | 13. Do you have additional teaching qualification?                                                                                                                                                | yesno, Required         | <table border="1"> <tr><td>1</td><td>Yes</td></tr> <tr><td>0</td><td>No</td></tr> </table>                                                                                                                         | 1 | Yes                     | 0                                                | No                     |           |                                   |   |                    |
| 1   | Yes                                                   |                                                                                                                                                                                                   |                         |                                                                                                                                                                                                                    |   |                         |                                                  |                        |           |                                   |   |                    |
| 0   | No                                                    |                                                                                                                                                                                                   |                         |                                                                                                                                                                                                                    |   |                         |                                                  |                        |           |                                   |   |                    |
| 877 | [aa011a]<br>Show the field ONLY if:<br>[aa011] = '1'  | 13a. Type of additional teaching qualifications                                                                                                                                                   | checkbox, Required      | <table border="1"> <tr> <td>1</td> <td>aa011a__1</td> <td>Postgraduate diploma (midwifery tutor programme)</td> </tr> <tr> <td>2</td> <td>aa011a__2</td> <td>Postgraduate diploma in education</td> </tr> </table> | 1 | aa011a__1               | Postgraduate diploma (midwifery tutor programme) | 2                      | aa011a__2 | Postgraduate diploma in education |   |                    |
| 1   | aa011a__1                                             | Postgraduate diploma (midwifery tutor programme)                                                                                                                                                  |                         |                                                                                                                                                                                                                    |   |                         |                                                  |                        |           |                                   |   |                    |
| 2   | aa011a__2                                             | Postgraduate diploma in education                                                                                                                                                                 |                         |                                                                                                                                                                                                                    |   |                         |                                                  |                        |           |                                   |   |                    |
| 878 | [aa012]                                               | 14. As an educator do you participate in...                                                                                                                                                       | radio                   | <table border="1"> <tr><td>1</td><td>Classroom teaching only</td></tr> <tr><td>2</td><td>Clinical teaching only</td></tr> <tr><td>3</td><td>Both</td></tr> </table>                                                | 1 | Classroom teaching only | 2                                                | Clinical teaching only | 3         | Both                              |   |                    |
| 1   | Classroom teaching only                               |                                                                                                                                                                                                   |                         |                                                                                                                                                                                                                    |   |                         |                                                  |                        |           |                                   |   |                    |
| 2   | Clinical teaching only                                |                                                                                                                                                                                                   |                         |                                                                                                                                                                                                                    |   |                         |                                                  |                        |           |                                   |   |                    |
| 3   | Both                                                  |                                                                                                                                                                                                   |                         |                                                                                                                                                                                                                    |   |                         |                                                  |                        |           |                                   |   |                    |
| 879 | [b013]                                                | 13. Number of years teaching midwifery                                                                                                                                                            | dropdown, Required      | <table border="1"> <tr><td>1</td><td>Less than 2 years</td></tr> <tr><td>2</td><td>2-5 years</td></tr> <tr><td>3</td><td>6-10 years</td></tr> <tr><td>4</td><td>More than 10 years</td></tr> </table>              | 1 | Less than 2 years       | 2                                                | 2-5 years              | 3         | 6-10 years                        | 4 | More than 10 years |
| 1   | Less than 2 years                                     |                                                                                                                                                                                                   |                         |                                                                                                                                                                                                                    |   |                         |                                                  |                        |           |                                   |   |                    |
| 2   | 2-5 years                                             |                                                                                                                                                                                                   |                         |                                                                                                                                                                                                                    |   |                         |                                                  |                        |           |                                   |   |                    |
| 3   | 6-10 years                                            |                                                                                                                                                                                                   |                         |                                                                                                                                                                                                                    |   |                         |                                                  |                        |           |                                   |   |                    |
| 4   | More than 10 years                                    |                                                                                                                                                                                                   |                         |                                                                                                                                                                                                                    |   |                         |                                                  |                        |           |                                   |   |                    |
| 880 | [ab01]                                                | Section Header: <i>Section B: Observation of teaching Directions: Please respond to each of the following statements by checking the appropriate option which corresponds to your observation</i> | yesno, Required         | <table border="1"> <tr><td>1</td><td>Yes</td></tr> </table>                                                                                                                                                        | 1 | Yes                     |                                                  |                        |           |                                   |   |                    |
| 1   | Yes                                                   |                                                                                                                                                                                                   |                         |                                                                                                                                                                                                                    |   |                         |                                                  |                        |           |                                   |   |                    |

|     |          |                                                                                                                           |                                                                                |
|-----|----------|---------------------------------------------------------------------------------------------------------------------------|--------------------------------------------------------------------------------|
|     |          | 1. Is there a written teaching plan for the lesson?                                                                       | <input type="checkbox"/> No                                                    |
| 881 | [ ab02 ] | 2. Stated the purpose of the class session (learning outcomes)                                                            | yesno, Required<br><input type="checkbox"/> Yes<br><input type="checkbox"/> No |
| 882 | [ ab03 ] | 3. Made explicit the relationship between today's and other aspects of the course                                         | yesno, Required<br><input type="checkbox"/> Yes<br><input type="checkbox"/> No |
| 883 | [ ab04 ] | 4. Arranged and discussed the content in a systematic and organized fashion                                               | yesno, Required<br><input type="checkbox"/> Yes<br><input type="checkbox"/> No |
| 884 | [ ab05 ] | 5. Asked questions periodically to determine whether students are understanding                                           | yesno, Required<br><input type="checkbox"/> Yes<br><input type="checkbox"/> No |
| 885 | [ ab06 ] | 6. Used alternate explanations when necessary                                                                             | yesno, Required<br><input type="checkbox"/> Yes<br><input type="checkbox"/> No |
| 886 | [ ab07 ] | 7. Summarised the most important ideas at different sections                                                              | yesno, Required<br><input type="checkbox"/> Yes<br><input type="checkbox"/> No |
| 887 | [ ab08 ] | 8. Did not often deviate from the main topic                                                                              | yesno, Required<br><input type="checkbox"/> Yes<br><input type="checkbox"/> No |
| 888 | [ ab09 ] | 9. Content was factually correct and evidence-based                                                                       | yesno, Required<br><input type="checkbox"/> Yes<br><input type="checkbox"/> No |
| 889 | [ ab10 ] | 10. Please provide additional comments on the teaching content above.                                                     | notes                                                                          |
| 890 | [ ac01 ] | Section Header: <i>Section C: Use of questions</i><br>1. Asked questions to assess student knowledge on the lecture topic | yesno, Required<br><input type="checkbox"/> Yes<br><input type="checkbox"/> No |
| 891 | [ ac02 ] | 2. Addressed questions to individual students as well as to the group at large                                            | yesno, Required<br><input type="checkbox"/> Yes<br><input type="checkbox"/> No |
| 892 | [ ac03 ] | 3. Paused after questions to allow students time to think of an answer (students challenged to think)                     | yesno, Required<br><input type="checkbox"/> Yes<br><input type="checkbox"/> No |
| 893 | [ ac04 ] | 4. Received student questions politely and enthusiastically                                                               | yesno, Required<br><input type="checkbox"/> Yes                                |

|     |                |                                                                                                                                                                                                  |                    |                                                                                                                                                                                                                                                                                                                                                     |   |         |             |    |         |                |   |         |        |   |         |                                     |   |         |      |
|-----|----------------|--------------------------------------------------------------------------------------------------------------------------------------------------------------------------------------------------|--------------------|-----------------------------------------------------------------------------------------------------------------------------------------------------------------------------------------------------------------------------------------------------------------------------------------------------------------------------------------------------|---|---------|-------------|----|---------|----------------|---|---------|--------|---|---------|-------------------------------------|---|---------|------|
|     |                |                                                                                                                                                                                                  |                    | <table border="1"> <tr> <td>0</td> <td>No</td> </tr> </table>                                                                                                                                                                                                                                                                                       | 0 | No      |             |    |         |                |   |         |        |   |         |                                     |   |         |      |
| 0   | No             |                                                                                                                                                                                                  |                    |                                                                                                                                                                                                                                                                                                                                                     |   |         |             |    |         |                |   |         |        |   |         |                                     |   |         |      |
| 894 | [ ac05 ]       | 5. Encouraged students to answer difficult questions by providing cues or rephrasing                                                                                                             | yesno, Required    | <table border="1"> <tr> <td>1</td> <td>Yes</td> </tr> <tr> <td>0</td> <td>No</td> </tr> </table>                                                                                                                                                                                                                                                    | 1 | Yes     | 0           | No |         |                |   |         |        |   |         |                                     |   |         |      |
| 1   | Yes            |                                                                                                                                                                                                  |                    |                                                                                                                                                                                                                                                                                                                                                     |   |         |             |    |         |                |   |         |        |   |         |                                     |   |         |      |
| 0   | No             |                                                                                                                                                                                                  |                    |                                                                                                                                                                                                                                                                                                                                                     |   |         |             |    |         |                |   |         |        |   |         |                                     |   |         |      |
| 895 | [ ac06 ]       | 6. Involved the entire class in answering questions                                                                                                                                              | yesno, Required    | <table border="1"> <tr> <td>1</td> <td>Yes</td> </tr> <tr> <td>0</td> <td>No</td> </tr> </table>                                                                                                                                                                                                                                                    | 1 | Yes     | 0           | No |         |                |   |         |        |   |         |                                     |   |         |      |
| 1   | Yes            |                                                                                                                                                                                                  |                    |                                                                                                                                                                                                                                                                                                                                                     |   |         |             |    |         |                |   |         |        |   |         |                                     |   |         |      |
| 0   | No             |                                                                                                                                                                                                  |                    |                                                                                                                                                                                                                                                                                                                                                     |   |         |             |    |         |                |   |         |        |   |         |                                     |   |         |      |
| 896 | [ ac07 ]       | 7. Encouraged students to ask questions                                                                                                                                                          | yesno, Required    | <table border="1"> <tr> <td>1</td> <td>Yes</td> </tr> <tr> <td>0</td> <td>No</td> </tr> </table>                                                                                                                                                                                                                                                    | 1 | Yes     | 0           | No |         |                |   |         |        |   |         |                                     |   |         |      |
| 1   | Yes            |                                                                                                                                                                                                  |                    |                                                                                                                                                                                                                                                                                                                                                     |   |         |             |    |         |                |   |         |        |   |         |                                     |   |         |      |
| 0   | No             |                                                                                                                                                                                                  |                    |                                                                                                                                                                                                                                                                                                                                                     |   |         |             |    |         |                |   |         |        |   |         |                                     |   |         |      |
| 897 | [ ac08 ]       | 8. Please provide additional comments on the use of questions identified above                                                                                                                   | notes, Required    |                                                                                                                                                                                                                                                                                                                                                     |   |         |             |    |         |                |   |         |        |   |         |                                     |   |         |      |
| 898 | [ ad01 ]       | <p>Section Header: <i>Section D: Resources</i></p> <p>1. Which of the listed teaching aids were used?<br/><i>Select all that apply</i></p>                                                       | checkbox, Required | <table border="1"> <tr> <td>1</td> <td>ad01__1</td> <td>Visual aids</td> </tr> <tr> <td>2</td> <td>ad01__2</td> <td>Flip charts</td> </tr> <tr> <td>3</td> <td>ad01__3</td> <td>Models</td> </tr> <tr> <td>4</td> <td>ad01__4</td> <td>IT and/or communications technology</td> </tr> <tr> <td>0</td> <td>ad01__0</td> <td>None</td> </tr> </table> | 1 | ad01__1 | Visual aids | 2  | ad01__2 | Flip charts    | 3 | ad01__3 | Models | 4 | ad01__4 | IT and/or communications technology | 0 | ad01__0 | None |
| 1   | ad01__1        | Visual aids                                                                                                                                                                                      |                    |                                                                                                                                                                                                                                                                                                                                                     |   |         |             |    |         |                |   |         |        |   |         |                                     |   |         |      |
| 2   | ad01__2        | Flip charts                                                                                                                                                                                      |                    |                                                                                                                                                                                                                                                                                                                                                     |   |         |             |    |         |                |   |         |        |   |         |                                     |   |         |      |
| 3   | ad01__3        | Models                                                                                                                                                                                           |                    |                                                                                                                                                                                                                                                                                                                                                     |   |         |             |    |         |                |   |         |        |   |         |                                     |   |         |      |
| 4   | ad01__4        | IT and/or communications technology                                                                                                                                                              |                    |                                                                                                                                                                                                                                                                                                                                                     |   |         |             |    |         |                |   |         |        |   |         |                                     |   |         |      |
| 0   | ad01__0        | None                                                                                                                                                                                             |                    |                                                                                                                                                                                                                                                                                                                                                     |   |         |             |    |         |                |   |         |        |   |         |                                     |   |         |      |
| 899 | [ ad02 ]       | 2. Writing onboard/overhead/ slides was legible (font size, contrast, neatness)                                                                                                                  | radio, Required    | <table border="1"> <tr> <td>1</td> <td>Yes</td> </tr> <tr> <td>0</td> <td>No</td> </tr> <tr> <td>-88</td> <td>Not applicable</td> </tr> </table>                                                                                                                                                                                                    | 1 | Yes     | 0           | No | -88     | Not applicable |   |         |        |   |         |                                     |   |         |      |
| 1   | Yes            |                                                                                                                                                                                                  |                    |                                                                                                                                                                                                                                                                                                                                                     |   |         |             |    |         |                |   |         |        |   |         |                                     |   |         |      |
| 0   | No             |                                                                                                                                                                                                  |                    |                                                                                                                                                                                                                                                                                                                                                     |   |         |             |    |         |                |   |         |        |   |         |                                     |   |         |      |
| -88 | Not applicable |                                                                                                                                                                                                  |                    |                                                                                                                                                                                                                                                                                                                                                     |   |         |             |    |         |                |   |         |        |   |         |                                     |   |         |      |
| 900 | [ ad03 ]       | 3. Information presented onboard/overhead/slides was organized and easy to follow                                                                                                                | radio, Required    | <table border="1"> <tr> <td>1</td> <td>Yes</td> </tr> <tr> <td>0</td> <td>No</td> </tr> <tr> <td>-88</td> <td>Not applicable</td> </tr> </table>                                                                                                                                                                                                    | 1 | Yes     | 0           | No | -88     | Not applicable |   |         |        |   |         |                                     |   |         |      |
| 1   | Yes            |                                                                                                                                                                                                  |                    |                                                                                                                                                                                                                                                                                                                                                     |   |         |             |    |         |                |   |         |        |   |         |                                     |   |         |      |
| 0   | No             |                                                                                                                                                                                                  |                    |                                                                                                                                                                                                                                                                                                                                                     |   |         |             |    |         |                |   |         |        |   |         |                                     |   |         |      |
| -88 | Not applicable |                                                                                                                                                                                                  |                    |                                                                                                                                                                                                                                                                                                                                                     |   |         |             |    |         |                |   |         |        |   |         |                                     |   |         |      |
| 901 | [ ad04 ]       | 4. The resource materials were handled competently(e.g., the instructor did not walk in front of the image for slide projector; the instructor spoke to the class not the screen or board; etc.) | radio, Required    | <table border="1"> <tr> <td>1</td> <td>Yes</td> </tr> <tr> <td>0</td> <td>No</td> </tr> <tr> <td>-88</td> <td>Not applicable</td> </tr> </table>                                                                                                                                                                                                    | 1 | Yes     | 0           | No | -88     | Not applicable |   |         |        |   |         |                                     |   |         |      |
| 1   | Yes            |                                                                                                                                                                                                  |                    |                                                                                                                                                                                                                                                                                                                                                     |   |         |             |    |         |                |   |         |        |   |         |                                     |   |         |      |
| 0   | No             |                                                                                                                                                                                                  |                    |                                                                                                                                                                                                                                                                                                                                                     |   |         |             |    |         |                |   |         |        |   |         |                                     |   |         |      |
| -88 | Not applicable |                                                                                                                                                                                                  |                    |                                                                                                                                                                                                                                                                                                                                                     |   |         |             |    |         |                |   |         |        |   |         |                                     |   |         |      |
| 902 | [ ad05 ]       | 5. Appropriate learning materials were provided to students e.g. lecture notes/slides, handouts, procedure manuals etc...                                                                        | radio, Required    | <table border="1"> <tr> <td>1</td> <td>Yes</td> </tr> <tr> <td>0</td> <td>No</td> </tr> <tr> <td>-88</td> <td>Not applicable</td> </tr> </table>                                                                                                                                                                                                    | 1 | Yes     | 0           | No | -88     | Not applicable |   |         |        |   |         |                                     |   |         |      |
| 1   | Yes            |                                                                                                                                                                                                  |                    |                                                                                                                                                                                                                                                                                                                                                     |   |         |             |    |         |                |   |         |        |   |         |                                     |   |         |      |
| 0   | No             |                                                                                                                                                                                                  |                    |                                                                                                                                                                                                                                                                                                                                                     |   |         |             |    |         |                |   |         |        |   |         |                                     |   |         |      |
| -88 | Not applicable |                                                                                                                                                                                                  |                    |                                                                                                                                                                                                                                                                                                                                                     |   |         |             |    |         |                |   |         |        |   |         |                                     |   |         |      |
| 903 | [ ad06 ]       | 6. Please provide additional comments on the resources available to support teaching and learning                                                                                                | notes, Required    |                                                                                                                                                                                                                                                                                                                                                     |   |         |             |    |         |                |   |         |        |   |         |                                     |   |         |      |
| 904 | [ ae01 ]       | Section Header: <i>Section E: Use of examples</i>                                                                                                                                                | radio, Required    |                                                                                                                                                                                                                                                                                                                                                     |   |         |             |    |         |                |   |         |        |   |         |                                     |   |         |      |

|     |                      |                                                                                                                       |                                                                                                                                                                                                                                                               |   |                |   |                 |     |                 |   |                      |
|-----|----------------------|-----------------------------------------------------------------------------------------------------------------------|---------------------------------------------------------------------------------------------------------------------------------------------------------------------------------------------------------------------------------------------------------------|---|----------------|---|-----------------|-----|-----------------|---|----------------------|
|     |                      | 1. Were examples used to enhance student understanding?                                                               | <table border="1"> <tr><td>1</td><td>Yes</td></tr> <tr><td>0</td><td>No</td></tr> <tr><td>-88</td><td>Not applicable</td></tr> </table>                                                                                                                       | 1 | Yes            | 0 | No              | -88 | Not applicable  |   |                      |
| 1   | Yes                  |                                                                                                                       |                                                                                                                                                                                                                                                               |   |                |   |                 |     |                 |   |                      |
| 0   | No                   |                                                                                                                       |                                                                                                                                                                                                                                                               |   |                |   |                 |     |                 |   |                      |
| -88 | Not applicable       |                                                                                                                       |                                                                                                                                                                                                                                                               |   |                |   |                 |     |                 |   |                      |
| 905 | [ ae02 ]             | 2. Were student examples asked for?                                                                                   | radio, Required<br><table border="1"> <tr><td>1</td><td>Yes</td></tr> <tr><td>0</td><td>No</td></tr> <tr><td>-88</td><td>Not applicable</td></tr> </table>                                                                                                    | 1 | Yes            | 0 | No              | -88 | Not applicable  |   |                      |
| 1   | Yes                  |                                                                                                                       |                                                                                                                                                                                                                                                               |   |                |   |                 |     |                 |   |                      |
| 0   | No                   |                                                                                                                       |                                                                                                                                                                                                                                                               |   |                |   |                 |     |                 |   |                      |
| -88 | Not applicable       |                                                                                                                       |                                                                                                                                                                                                                                                               |   |                |   |                 |     |                 |   |                      |
| 906 | [ ae04 ]             | 4. Please provide additional comments on the use of examples observed                                                 | notes, Required                                                                                                                                                                                                                                               |   |                |   |                 |     |                 |   |                      |
| 907 | [ af01 ]             | Section Header: <i>Section F: Individual style</i><br>1. Voice could be easily heard                                  | yesno, Required<br><table border="1"> <tr><td>1</td><td>Yes</td></tr> <tr><td>0</td><td>No</td></tr> </table>                                                                                                                                                 | 1 | Yes            | 0 | No              |     |                 |   |                      |
| 1   | Yes                  |                                                                                                                       |                                                                                                                                                                                                                                                               |   |                |   |                 |     |                 |   |                      |
| 0   | No                   |                                                                                                                       |                                                                                                                                                                                                                                                               |   |                |   |                 |     |                 |   |                      |
| 908 | [ af02 ]             | 2. Voice was raised or lowered for variety and emphasis                                                               | radio, Required<br><table border="1"> <tr><td>1</td><td>Never</td></tr> <tr><td>2</td><td>Sometimes</td></tr> <tr><td>3</td><td>Frequently</td></tr> </table>                                                                                                 | 1 | Never          | 2 | Sometimes       | 3   | Frequently      |   |                      |
| 1   | Never                |                                                                                                                       |                                                                                                                                                                                                                                                               |   |                |   |                 |     |                 |   |                      |
| 2   | Sometimes            |                                                                                                                       |                                                                                                                                                                                                                                                               |   |                |   |                 |     |                 |   |                      |
| 3   | Frequently           |                                                                                                                       |                                                                                                                                                                                                                                                               |   |                |   |                 |     |                 |   |                      |
| 909 | [ af03 ]             | 3. Was there room for questions and discussion?                                                                       | radio, Required<br><table border="1"> <tr><td>1</td><td>Never</td></tr> <tr><td>2</td><td>Sometimes</td></tr> <tr><td>3</td><td>Frequently</td></tr> </table>                                                                                                 | 1 | Never          | 2 | Sometimes       | 3   | Frequently      |   |                      |
| 1   | Never                |                                                                                                                       |                                                                                                                                                                                                                                                               |   |                |   |                 |     |                 |   |                      |
| 2   | Sometimes            |                                                                                                                       |                                                                                                                                                                                                                                                               |   |                |   |                 |     |                 |   |                      |
| 3   | Frequently           |                                                                                                                       |                                                                                                                                                                                                                                                               |   |                |   |                 |     |                 |   |                      |
| 910 | [ af04 ]             | 4. Please provide additional comments on the individual style observed                                                | notes, Required                                                                                                                                                                                                                                               |   |                |   |                 |     |                 |   |                      |
| 911 | [ ag01 ]             | Section Header: <i>Section G: What teaching methods were applied in this teaching session?</i><br>1. Didactic/lecture | dropdown, Required<br><table border="1"> <tr><td>1</td><td>0% of the time</td></tr> <tr><td>2</td><td>25% of the time</td></tr> <tr><td>3</td><td>50% of the time</td></tr> <tr><td>4</td><td>Over 50% of the time</td></tr> </table><br>Custom alignment: RH | 1 | 0% of the time | 2 | 25% of the time | 3   | 50% of the time | 4 | Over 50% of the time |
| 1   | 0% of the time       |                                                                                                                       |                                                                                                                                                                                                                                                               |   |                |   |                 |     |                 |   |                      |
| 2   | 25% of the time      |                                                                                                                       |                                                                                                                                                                                                                                                               |   |                |   |                 |     |                 |   |                      |
| 3   | 50% of the time      |                                                                                                                       |                                                                                                                                                                                                                                                               |   |                |   |                 |     |                 |   |                      |
| 4   | Over 50% of the time |                                                                                                                       |                                                                                                                                                                                                                                                               |   |                |   |                 |     |                 |   |                      |
| 912 | [ ag02 ]             | 2. Small group discussions                                                                                            | dropdown, Required<br><table border="1"> <tr><td>1</td><td>0% of the time</td></tr> <tr><td>2</td><td>25% of the time</td></tr> <tr><td>3</td><td>50% of the time</td></tr> <tr><td>4</td><td>Over 50% of the time</td></tr> </table><br>Custom alignment: RH | 1 | 0% of the time | 2 | 25% of the time | 3   | 50% of the time | 4 | Over 50% of the time |
| 1   | 0% of the time       |                                                                                                                       |                                                                                                                                                                                                                                                               |   |                |   |                 |     |                 |   |                      |
| 2   | 25% of the time      |                                                                                                                       |                                                                                                                                                                                                                                                               |   |                |   |                 |     |                 |   |                      |
| 3   | 50% of the time      |                                                                                                                       |                                                                                                                                                                                                                                                               |   |                |   |                 |     |                 |   |                      |
| 4   | Over 50% of the time |                                                                                                                       |                                                                                                                                                                                                                                                               |   |                |   |                 |     |                 |   |                      |
| 913 | [ ag03 ]             | 3. Simulation/demonstration                                                                                           | dropdown, Required<br><table border="1"> <tr><td>1</td><td>0% of the time</td></tr> <tr><td>2</td><td>25% of the time</td></tr> <tr><td>3</td><td>50% of the time</td></tr> </table>                                                                          | 1 | 0% of the time | 2 | 25% of the time | 3   | 50% of the time |   |                      |
| 1   | 0% of the time       |                                                                                                                       |                                                                                                                                                                                                                                                               |   |                |   |                 |     |                 |   |                      |
| 2   | 25% of the time      |                                                                                                                       |                                                                                                                                                                                                                                                               |   |                |   |                 |     |                 |   |                      |
| 3   | 50% of the time      |                                                                                                                       |                                                                                                                                                                                                                                                               |   |                |   |                 |     |                 |   |                      |

|     |                      |                                                                                                                                                                                                             |                    |                                                                                                                                                                                                                                                         |   |                      |   |                 |     |                 |   |                      |
|-----|----------------------|-------------------------------------------------------------------------------------------------------------------------------------------------------------------------------------------------------------|--------------------|---------------------------------------------------------------------------------------------------------------------------------------------------------------------------------------------------------------------------------------------------------|---|----------------------|---|-----------------|-----|-----------------|---|----------------------|
|     |                      |                                                                                                                                                                                                             |                    | <table border="1"> <tr> <td>4</td> <td>Over 50% of the time</td> </tr> </table> <p>Custom alignment: RH</p>                                                                                                                                             | 4 | Over 50% of the time |   |                 |     |                 |   |                      |
| 4   | Over 50% of the time |                                                                                                                                                                                                             |                    |                                                                                                                                                                                                                                                         |   |                      |   |                 |     |                 |   |                      |
| 914 | [ ag04 ]             | 4. Hands-on using mannequins                                                                                                                                                                                | dropdown, Required | <table border="1"> <tr> <td>1</td> <td>0% of the time</td> </tr> <tr> <td>2</td> <td>25% of the time</td> </tr> <tr> <td>3</td> <td>50% of the time</td> </tr> <tr> <td>4</td> <td>Over 50% of the time</td> </tr> </table> <p>Custom alignment: RH</p> | 1 | 0% of the time       | 2 | 25% of the time | 3   | 50% of the time | 4 | Over 50% of the time |
| 1   | 0% of the time       |                                                                                                                                                                                                             |                    |                                                                                                                                                                                                                                                         |   |                      |   |                 |     |                 |   |                      |
| 2   | 25% of the time      |                                                                                                                                                                                                             |                    |                                                                                                                                                                                                                                                         |   |                      |   |                 |     |                 |   |                      |
| 3   | 50% of the time      |                                                                                                                                                                                                             |                    |                                                                                                                                                                                                                                                         |   |                      |   |                 |     |                 |   |                      |
| 4   | Over 50% of the time |                                                                                                                                                                                                             |                    |                                                                                                                                                                                                                                                         |   |                      |   |                 |     |                 |   |                      |
| 915 | [ ag05 ]             | 5. Videos                                                                                                                                                                                                   | dropdown, Required | <table border="1"> <tr> <td>1</td> <td>0% of the time</td> </tr> <tr> <td>2</td> <td>25% of the time</td> </tr> <tr> <td>3</td> <td>50% of the time</td> </tr> <tr> <td>4</td> <td>Over 50% of the time</td> </tr> </table> <p>Custom alignment: RH</p> | 1 | 0% of the time       | 2 | 25% of the time | 3   | 50% of the time | 4 | Over 50% of the time |
| 1   | 0% of the time       |                                                                                                                                                                                                             |                    |                                                                                                                                                                                                                                                         |   |                      |   |                 |     |                 |   |                      |
| 2   | 25% of the time      |                                                                                                                                                                                                             |                    |                                                                                                                                                                                                                                                         |   |                      |   |                 |     |                 |   |                      |
| 3   | 50% of the time      |                                                                                                                                                                                                             |                    |                                                                                                                                                                                                                                                         |   |                      |   |                 |     |                 |   |                      |
| 4   | Over 50% of the time |                                                                                                                                                                                                             |                    |                                                                                                                                                                                                                                                         |   |                      |   |                 |     |                 |   |                      |
| 916 | [ ag06 ]             | 6. Scenario                                                                                                                                                                                                 | dropdown, Required | <table border="1"> <tr> <td>1</td> <td>0% of the time</td> </tr> <tr> <td>2</td> <td>25% of the time</td> </tr> <tr> <td>3</td> <td>50% of the time</td> </tr> <tr> <td>4</td> <td>Over 50% of the time</td> </tr> </table> <p>Custom alignment: RH</p> | 1 | 0% of the time       | 2 | 25% of the time | 3   | 50% of the time | 4 | Over 50% of the time |
| 1   | 0% of the time       |                                                                                                                                                                                                             |                    |                                                                                                                                                                                                                                                         |   |                      |   |                 |     |                 |   |                      |
| 2   | 25% of the time      |                                                                                                                                                                                                             |                    |                                                                                                                                                                                                                                                         |   |                      |   |                 |     |                 |   |                      |
| 3   | 50% of the time      |                                                                                                                                                                                                             |                    |                                                                                                                                                                                                                                                         |   |                      |   |                 |     |                 |   |                      |
| 4   | Over 50% of the time |                                                                                                                                                                                                             |                    |                                                                                                                                                                                                                                                         |   |                      |   |                 |     |                 |   |                      |
| 917 | [ ag07 ]             | 7. Use of digital content Available a. First person point of view videos - 1PPoV {ag07a} b. Podcast {ag07b} c. 2D/3D animations {ag07c} d. Interactive learning activities with H5P (HTMLs package) {ag07d} | descriptive        |                                                                                                                                                                                                                                                         |   |                      |   |                 |     |                 |   |                      |
| 918 | [ ag07a ]            | 7a. First person point of view videos - 1PPoV                                                                                                                                                               | radio, Required    | <table border="1"> <tr> <td>1</td> <td>Yes</td> </tr> <tr> <td>0</td> <td>No</td> </tr> <tr> <td>-99</td> <td>INF</td> </tr> </table> <p>Custom alignment: RH</p>                                                                                       | 1 | Yes                  | 0 | No              | -99 | INF             |   |                      |
| 1   | Yes                  |                                                                                                                                                                                                             |                    |                                                                                                                                                                                                                                                         |   |                      |   |                 |     |                 |   |                      |
| 0   | No                   |                                                                                                                                                                                                             |                    |                                                                                                                                                                                                                                                         |   |                      |   |                 |     |                 |   |                      |
| -99 | INF                  |                                                                                                                                                                                                             |                    |                                                                                                                                                                                                                                                         |   |                      |   |                 |     |                 |   |                      |
| 919 | [ ag07b ]            | 7b. Podcast                                                                                                                                                                                                 | radio, Required    | <table border="1"> <tr> <td>1</td> <td>Yes</td> </tr> <tr> <td>0</td> <td>No</td> </tr> <tr> <td>-99</td> <td>INF</td> </tr> </table> <p>Custom alignment: RH</p>                                                                                       | 1 | Yes                  | 0 | No              | -99 | INF             |   |                      |
| 1   | Yes                  |                                                                                                                                                                                                             |                    |                                                                                                                                                                                                                                                         |   |                      |   |                 |     |                 |   |                      |
| 0   | No                   |                                                                                                                                                                                                             |                    |                                                                                                                                                                                                                                                         |   |                      |   |                 |     |                 |   |                      |
| -99 | INF                  |                                                                                                                                                                                                             |                    |                                                                                                                                                                                                                                                         |   |                      |   |                 |     |                 |   |                      |
| 920 | [ ag07c ]            | 7c. 2D/3D animations                                                                                                                                                                                        | radio, Required    | <table border="1"> <tr> <td>1</td> <td>Yes</td> </tr> </table>                                                                                                                                                                                          | 1 | Yes                  |   |                 |     |                 |   |                      |
| 1   | Yes                  |                                                                                                                                                                                                             |                    |                                                                                                                                                                                                                                                         |   |                      |   |                 |     |                 |   |                      |

|                                                                                                                             |                                                   |                                                                                  |                                                                                                                                                                                 |                                                                                                                          |            |    |            |     |          |
|-----------------------------------------------------------------------------------------------------------------------------|---------------------------------------------------|----------------------------------------------------------------------------------|---------------------------------------------------------------------------------------------------------------------------------------------------------------------------------|--------------------------------------------------------------------------------------------------------------------------|------------|----|------------|-----|----------|
|                                                                                                                             |                                                   |                                                                                  |                                                                                                                                                                                 | <table border="1"> <tr><td>0</td><td>No</td></tr> <tr><td>-99</td><td>INF</td></tr> </table> <p>Custom alignment: RH</p> | 0          | No | -99        | INF |          |
| 0                                                                                                                           | No                                                |                                                                                  |                                                                                                                                                                                 |                                                                                                                          |            |    |            |     |          |
| -99                                                                                                                         | INF                                               |                                                                                  |                                                                                                                                                                                 |                                                                                                                          |            |    |            |     |          |
| 921                                                                                                                         | [ ag07d ]                                         | 7d. Interactive learning activities with H5P (HTMLs package)                     | <p>radio, Required</p> <table border="1"> <tr><td>1</td><td>Yes</td></tr> <tr><td>0</td><td>No</td></tr> <tr><td>-99</td><td>INF</td></tr> </table> <p>Custom alignment: RH</p> | 1                                                                                                                        | Yes        | 0  | No         | -99 | INF      |
| 1                                                                                                                           | Yes                                               |                                                                                  |                                                                                                                                                                                 |                                                                                                                          |            |    |            |     |          |
| 0                                                                                                                           | No                                                |                                                                                  |                                                                                                                                                                                 |                                                                                                                          |            |    |            |     |          |
| -99                                                                                                                         | INF                                               |                                                                                  |                                                                                                                                                                                 |                                                                                                                          |            |    |            |     |          |
| 922                                                                                                                         | [ ag09 ]                                          | 9. Please provide any comments on the key strengths observed                     | <p>notes, Required</p> <p>Custom alignment: RH</p>                                                                                                                              |                                                                                                                          |            |    |            |     |          |
| 923                                                                                                                         | [ ag10 ]                                          | 10. Please provide any comments on the areas for improvement observed/identified | <p>notes, Required</p> <p>Custom alignment: RH</p>                                                                                                                              |                                                                                                                          |            |    |            |     |          |
| 924                                                                                                                         | [ teaching_observati<br>on_form_v3_complet<br>e ] | Section Header: <i>Form Status</i><br>Complete?                                  | <p>dropdown</p> <table border="1"> <tr><td>0</td><td>Incomplete</td></tr> <tr><td>1</td><td>Unverified</td></tr> <tr><td>2</td><td>Complete</td></tr> </table>                  | 0                                                                                                                        | Incomplete | 1  | Unverified | 2   | Complete |
| 0                                                                                                                           | Incomplete                                        |                                                                                  |                                                                                                                                                                                 |                                                                                                                          |            |    |            |     |          |
| 1                                                                                                                           | Unverified                                        |                                                                                  |                                                                                                                                                                                 |                                                                                                                          |            |    |            |     |          |
| 2                                                                                                                           | Complete                                          |                                                                                  |                                                                                                                                                                                 |                                                                                                                          |            |    |            |     |          |
| <p><b>Instrument: Staff retention initial online survey</b> (staff_retention_initial_online_survey) [collapsed]</p>         |                                                   |                                                                                  |                                                                                                                                                                                 |                                                                                                                          |            |    |            |     |          |
| <p><b>Instrument: NMCN checklist tool_2025</b> (nmcn_checklist_tool_2025) [collapsed]</p>                                   |                                                   |                                                                                  |                                                                                                                                                                                 |                                                                                                                          |            |    |            |     |          |
| <p><b>Instrument: OSCE Basic Life Support Of The Newborn V2</b> (osce_basic_life_support_of_the_newborn_v2) [collapsed]</p> |                                                   |                                                                                  |                                                                                                                                                                                 |                                                                                                                          |            |    |            |     |          |
| <p><b>Instrument: OSCE Management Of PPH_V3</b> (osce_management_of_pph_v3) [collapsed]</p>                                 |                                                   |                                                                                  |                                                                                                                                                                                 |                                                                                                                          |            |    |            |     |          |
| <p><b>Instrument: OSCE Labour Care Guide (LCG)_V1</b> (osce_labour_care_guide_lcg_v1) [collapsed]</p>                       |                                                   |                                                                                  |                                                                                                                                                                                 |                                                                                                                          |            |    |            |     |          |
